# Supplementary material
Source: publisher site journal article supplement (https://www.dovepress.com/get_supplementary_file.php?f=488400.xlsx)
Supplement: Supplementary file 1 [file get_supplementary_file.php]

## Sheet: Table S1
	ONTOLOGY	ID	Description	GeneRatio	BgRatio	pvalue	p.adjust	qvalue	geneID	Count
GO:0019221	BP	GO:0019221	cytokine-mediated signaling pathway	19/51	450/28891	9.52074e-22	2.14978e-18	7.88718e-19	Il4ra/Csf2rb/Cxcl10/Fcer1g/Il2rg/Nfkbia/Ifih1/Ccl3/Il1a/Il13ra1/Il1b/Ccl2/Ccrl2/Il1rn/Ikbke/Ccl4/Irf7/Il6/Syk	19
GO:0032680	BP	GO:0032680	regulation of tumor necrosis factor production	15/51	216/28891	1.95965e-20	1.76366e-17	6.47058e-18	Fcer1g/Cd14/Ifih1/Ccl3/Il1a/Trim30a/Bcl3/Ccn1/H2-Q4/Ccl2/Tnfaip3/Cybb/Ccl4/Il6/Syk	15
GO:1903555	BP	GO:1903555	regulation of tumor necrosis factor superfamily cytokine production	15/51	219/28891	2.4184e-20	1.76366e-17	6.47058e-18	Fcer1g/Cd14/Ifih1/Ccl3/Il1a/Trim30a/Bcl3/Ccn1/H2-Q4/Ccl2/Tnfaip3/Cybb/Ccl4/Il6/Syk	15
GO:0032640	BP	GO:0032640	tumor necrosis factor production	15/51	223/28891	3.18642e-20	1.76366e-17	6.47058e-18	Fcer1g/Cd14/Ifih1/Ccl3/Il1a/Trim30a/Bcl3/Ccn1/H2-Q4/Ccl2/Tnfaip3/Cybb/Ccl4/Il6/Syk	15
GO:0071706	BP	GO:0071706	tumor necrosis factor superfamily cytokine production	15/51	226/28891	3.90537e-20	1.76366e-17	6.47058e-18	Fcer1g/Cd14/Ifih1/Ccl3/Il1a/Trim30a/Bcl3/Ccn1/H2-Q4/Ccl2/Tnfaip3/Cybb/Ccl4/Il6/Syk	15
GO:0032760	BP	GO:0032760	positive regulation of tumor necrosis factor production	12/51	143/28891	1.8175e-17	6.83985e-15	2.50942e-15	Fcer1g/Cd14/Ifih1/Ccl3/Il1a/Ccn1/H2-Q4/Ccl2/Cybb/Ccl4/Il6/Syk	12
GO:1903557	BP	GO:1903557	positive regulation of tumor necrosis factor superfamily cytokine production	12/51	145/28891	2.15621e-17	6.95533e-15	2.55179e-15	Fcer1g/Cd14/Ifih1/Ccl3/Il1a/Ccn1/H2-Q4/Ccl2/Cybb/Ccl4/Il6/Syk	12
GO:0005125	MF	GO:0005125	cytokine activity	13/51	236/28407	2.31973e-16	4.87144e-14	2.2709e-14	Cxcl10/Ccl3/Il1a/Fgf2/Tnfsf9/Il1b/Ccl2/Tnfsf8/Il1rn/Lif/Ccl4/Csf3/Il6	13
GO:0005126	MF	GO:0005126	cytokine receptor binding	13/51	323/28407	1.3483e-14	1.41571e-12	6.59956e-13	Cxcl10/Ccl3/Tnfsf9/Il1b/Ccl2/Ccrl2/Tnfsf8/Il1rn/Lif/Ccl4/Csf3/Il6/Syk	13
GO:0030217	BP	GO:0030217	T cell differentiation	13/51	339/28891	2.02623e-14	5.71903e-12	2.09821e-12	Il4ra/Fas/Fcer1g/Il2rg/Il1a/Tnfsf9/Bcl3/Relb/Il1b/Tnfsf8/Rsad2/Il6/Syk	13
GO:0030098	BP	GO:0030098	lymphocyte differentiation	14/51	486/28891	8.83407e-14	2.21637e-11	8.13147e-12	Il4ra/Fas/Fcer1g/Il2rg/Il1a/Tnfsf9/Bcl3/Relb/Il1b/Tnfsf8/Rsad2/Tnfaip3/Il6/Syk	14
GO:0002460	BP	GO:0002460	adaptive immune response based on somatic recombination of immune receptors built from immunoglobulin superfamily domains	14/51	491/28891	1.01533e-13	2.29261e-11	8.41118e-12	Il4ra/Csf2rb/Fas/Icam1/Fcer1g/Bcl3/Fcgr2b/H2-Q4/Relb/Il1b/Rsad2/Tnfaip3/Irf7/Il6	14
GO:0032675	BP	GO:0032675	regulation of interleukin-6 production	10/51	173/28891	4.71302e-13	9.67454e-11	3.54942e-11	Fcer1g/Ifih1/Il1a/Trim30a/Tnfsf9/Ccn1/Il1b/Tnfaip3/Il6/Syk	10
GO:0032635	BP	GO:0032635	interleukin-6 production	10/51	182/28891	7.83937e-13	1.44506e-10	5.30167e-11	Fcer1g/Ifih1/Il1a/Trim30a/Tnfsf9/Ccn1/Il1b/Tnfaip3/Il6/Syk	10
GO:0071216	BP	GO:0071216	cellular response to biotic stimulus	12/51	349/28891	8.31965e-13	1.44506e-10	5.30167e-11	Cxcl10/Nfkbia/Cd14/Il1a/Gbp2/Trim30a/Fcgr2b/Il1b/Ccl2/Tnfaip3/Il6/Syk	12
GO:0045088	BP	GO:0045088	regulation of innate immune response	13/51	474/28891	1.43175e-12	2.30921e-10	8.4721e-11	Nfkbia/Cd14/Ifih1/Gbp2/Trim30a/H2-Q4/Eif2ak2/Rsad2/Fgr/Ikbke/Tnfaip3/Irf7/Syk	13
GO:0045089	BP	GO:0045089	positive regulation of innate immune response	12/51	385/28891	2.62967e-12	3.95852e-10	1.45231e-10	Nfkbia/Cd14/Ifih1/Gbp2/Trim30a/H2-Q4/Eif2ak2/Rsad2/Ikbke/Tnfaip3/Irf7/Syk	12
GO:0009615	BP	GO:0009615	response to virus	12/51	389/28891	2.9673e-12	4.1876e-10	1.53636e-10	Cxcl10/Ifih1/Trim30a/Bcl3/Lcn2/Il1b/Eif2ak2/Rsad2/Ikbke/Tnfaip3/Irf7/Il6	12
GO:0002833	BP	GO:0002833	positive regulation of response to biotic stimulus	12/51	413/28891	5.96495e-12	7.92285e-10	2.90676e-10	Nfkbia/Cd14/Ifih1/Gbp2/Trim30a/H2-Q4/Eif2ak2/Rsad2/Ikbke/Tnfaip3/Irf7/Syk	12
GO:0002237	BP	GO:0002237	response to molecule of bacterial origin	12/51	421/28891	7.45689e-12	9.35425e-10	3.43191e-10	Cxcl10/Nfkbia/Cd14/Il1a/Gbp2/Trim30a/Fcgr2b/Il1b/Ccl2/Eif2ak2/Tnfaip3/Il6	12
GO:0071219	BP	GO:0071219	cellular response to molecule of bacterial origin	11/51	322/28891	8.90215e-12	1.05795e-09	3.88144e-10	Cxcl10/Nfkbia/Cd14/Il1a/Gbp2/Trim30a/Fcgr2b/Il1b/Ccl2/Tnfaip3/Il6	11
GO:0051090	BP	GO:0051090	regulation of DNA-binding transcription factor activity	12/51	436/28891	1.11992e-11	1.26439e-09	4.63882e-10	Icam1/Nfkbia/Trim30a/Bcl3/Fcgr2b/Il1b/Eif2ak2/Ikbke/Tnfaip3/Csf3/Il6/Syk	12
GO:0002757	BP	GO:0002757	immune response-activating signaling pathway	12/51	440/28891	1.24509e-11	1.33876e-09	4.91169e-10	Fcer1g/Nfkbia/Cd14/Ifih1/Gbp2/Lcp2/Trim30a/Eif2ak2/Rsad2/Tnfaip3/Irf7/Syk	12
GO:0002758	BP	GO:0002758	innate immune response-activating signaling pathway	10/51	244/28891	1.44774e-11	1.48591e-09	5.45153e-10	Nfkbia/Cd14/Ifih1/Gbp2/Trim30a/Eif2ak2/Rsad2/Tnfaip3/Irf7/Syk	10
GO:0002764	BP	GO:0002764	immune response-regulating signaling pathway	12/51	450/28891	1.61553e-11	1.58603e-09	5.81887e-10	Fcer1g/Nfkbia/Cd14/Ifih1/Gbp2/Lcp2/Trim30a/Eif2ak2/Rsad2/Tnfaip3/Irf7/Syk	12
GO:0070372	BP	GO:0070372	regulation of ERK1 and ERK2 cascade	11/51	343/28891	1.75503e-11	1.65119e-09	6.05792e-10	Icam1/Ccl3/Il1a/Fgf2/Ccn1/Il1b/Ccl2/Lif/Ccl4/Il6/Syk	11
GO:0032755	BP	GO:0032755	positive regulation of interleukin-6 production	8/51	113/28891	2.35732e-11	2.12913e-09	7.81142e-10	Fcer1g/Ifih1/Il1a/Tnfsf9/Ccn1/Il1b/Il6/Syk	8
GO:0070371	BP	GO:0070371	ERK1 and ERK2 cascade	11/51	367/28891	3.61972e-11	3.14359e-09	1.15333e-09	Icam1/Ccl3/Il1a/Fgf2/Ccn1/Il1b/Ccl2/Lif/Ccl4/Il6/Syk	11
GO:0002449	BP	GO:0002449	lymphocyte mediated immunity	12/51	489/28891	4.2196e-11	3.52884e-09	1.29467e-09	Il4ra/Csf2rb/Fas/Icam1/Fcer1g/Bcl3/Fcgr2b/H2-Q4/Il1b/Rsad2/Irf7/Il6	12
GO:0002218	BP	GO:0002218	activation of innate immune response	10/51	281/28891	5.80503e-11	4.68134e-09	1.7175e-09	Nfkbia/Cd14/Ifih1/Gbp2/Trim30a/Eif2ak2/Rsad2/Tnfaip3/Irf7/Syk	10
GO:0032496	BP	GO:0032496	response to lipopolysaccharide	11/51	401/28891	9.30334e-11	7.24377e-09	2.65761e-09	Cxcl10/Nfkbia/Cd14/Il1a/Gbp2/Trim30a/Il1b/Ccl2/Eif2ak2/Tnfaip3/Il6	11
GO:0071347	BP	GO:0071347	cellular response to interleukin-1	7/51	81/28891	1.0949e-10	8.24095e-09	3.02346e-09	Nfkbia/Ccl3/Il1b/Ccl2/Il1rn/Ccl4/Il6	7
GO:0046632	BP	GO:0046632	alpha-beta T cell differentiation	8/51	138/28891	1.18233e-10	8.30098e-09	3.04548e-09	Il4ra/Il2rg/Bcl3/Relb/Tnfsf8/Rsad2/Il6/Syk	8
GO:1990266	BP	GO:1990266	neutrophil migration	8/51	138/28891	1.18233e-10	8.30098e-09	3.04548e-09	Cxcl10/Fcer1g/Ccl3/Il1a/Il1b/Ccl2/Ccl4/Syk	8
GO:1903039	BP	GO:1903039	positive regulation of leukocyte cell-cell adhesion	10/51	303/28891	1.21316e-10	8.30098e-09	3.04548e-09	Il4ra/Icam1/Il2rg/Il1a/Tnfsf9/H2-Q4/Il1b/Ccl2/Il6/Syk	10
GO:0002526	BP	GO:0002526	acute inflammatory response	8/51	139/28891	1.25287e-10	8.32054e-09	3.05266e-09	Icam1/Fcer1g/Il1a/Fcgr2b/H2-Q4/Il1b/Il1rn/Il6	8
GO:0071222	BP	GO:0071222	cellular response to lipopolysaccharide	10/51	312/28891	1.61384e-10	1.04116e-08	3.81982e-09	Cxcl10/Nfkbia/Cd14/Il1a/Gbp2/Trim30a/Il1b/Ccl2/Tnfaip3/Il6	10
GO:0002703	BP	GO:0002703	regulation of leukocyte mediated immunity	10/51	314/28891	1.71747e-10	1.07018e-08	3.92631e-09	Il4ra/Fcer1g/Fcgr2b/H2-Q4/Il1b/Ccl2/Rsad2/Fgr/Il6/Syk	10
GO:0046631	BP	GO:0046631	alpha-beta T cell activation	9/51	221/28891	1.75362e-10	1.07018e-08	3.92631e-09	Il4ra/Il2rg/Bcl3/H2-Q4/Relb/Tnfsf8/Rsad2/Il6/Syk	9
GO:0002696	BP	GO:0002696	positive regulation of leukocyte activation	11/51	432/28891	2.0486e-10	1.2173e-08	4.46606e-09	Il4ra/Fcer1g/Il2rg/Il1a/Tnfsf9/H2-Q4/Il1b/Ccl2/Fgr/Il6/Syk	11
GO:0002753	BP	GO:0002753	cytosolic pattern recognition receptor signaling pathway	8/51	150/28891	2.30583e-10	1.33501e-08	4.89794e-09	Nfkbia/Ifih1/Gbp2/Trim30a/Eif2ak2/Rsad2/Tnfaip3/Irf7	8
GO:0002221	BP	GO:0002221	pattern recognition receptor signaling pathway	9/51	233/28891	2.80216e-10	1.58182e-08	5.80342e-09	Nfkbia/Cd14/Ifih1/Gbp2/Trim30a/Eif2ak2/Rsad2/Tnfaip3/Irf7	9
GO:0002700	BP	GO:0002700	regulation of production of molecular mediator of immune response	9/51	236/28891	3.13804e-10	1.72822e-08	6.34054e-09	Il4ra/Fcer1g/Fcgr2b/H2-Q4/Il1b/Rsad2/Tnfaip3/Il6/Syk	9
GO:1903706	BP	GO:1903706	regulation of hemopoiesis	11/51	452/28891	3.30371e-10	1.77614e-08	6.51634e-09	Il4ra/Fas/Il2rg/Nfkbia/Ccl3/Tnfsf9/Lif/Csf3/Il6/Syk/Fos	11
GO:0050867	BP	GO:0050867	positive regulation of cell activation	11/51	454/28891	3.46111e-10	1.81748e-08	6.66803e-09	Il4ra/Fcer1g/Il2rg/Il1a/Tnfsf9/H2-Q4/Il1b/Ccl2/Fgr/Il6/Syk	11
GO:0070555	BP	GO:0070555	response to interleukin-1	7/51	96/28891	3.6787e-10	1.88784e-08	6.92616e-09	Nfkbia/Ccl3/Il1b/Ccl2/Il1rn/Ccl4/Il6	7
GO:0002697	BP	GO:0002697	regulation of immune effector process	11/51	473/28891	5.32878e-10	2.63455e-08	9.66571e-09	Il4ra/Fcer1g/Fcgr2b/H2-Q4/Il1b/Ccl2/Rsad2/Fgr/Tnfaip3/Il6/Syk	11
GO:0097530	BP	GO:0097530	granulocyte migration	8/51	167/28891	5.42693e-10	2.63455e-08	9.66571e-09	Cxcl10/Fcer1g/Ccl3/Il1a/Il1b/Ccl2/Ccl4/Syk	8
GO:0022409	BP	GO:0022409	positive regulation of cell-cell adhesion	10/51	354/28891	5.49808e-10	2.63455e-08	9.66571e-09	Il4ra/Icam1/Il2rg/Il1a/Tnfsf9/H2-Q4/Il1b/Ccl2/Il6/Syk	10
GO:0002819	BP	GO:0002819	regulation of adaptive immune response	9/51	252/28891	5.60046e-10	2.63455e-08	9.66571e-09	Il4ra/Fcer1g/Fcgr2b/H2-Q4/Il1b/Rsad2/Tnfaip3/Irf7/Il6	9
GO:0097398	BP	GO:0097398	cellular response to interleukin-17	5/51	24/28891	5.80612e-10	2.67555e-08	9.81614e-09	Socs3/Cxcl10/Il1b/Ikbke/Il6	5
GO:0030593	BP	GO:0030593	neutrophil chemotaxis	7/51	110/28891	9.63952e-10	4.35321e-08	1.59712e-08	Cxcl10/Fcer1g/Ccl3/Il1b/Ccl2/Ccl4/Syk	7
GO:0097396	BP	GO:0097396	response to interleukin-17	5/51	27/28891	1.0984e-09	4.86312e-08	1.78419e-08	Socs3/Cxcl10/Il1b/Ikbke/Il6	5
GO:0050870	BP	GO:0050870	positive regulation of T cell activation	9/51	277/28891	1.2864e-09	5.58594e-08	2.04938e-08	Il4ra/Il2rg/Il1a/Tnfsf9/H2-Q4/Il1b/Ccl2/Il6/Syk	9
GO:1903037	BP	GO:1903037	regulation of leukocyte cell-cell adhesion	10/51	407/28891	2.10612e-09	8.97285e-08	3.29198e-08	Il4ra/Icam1/Il2rg/Il1a/Tnfsf9/H2-Q4/Il1b/Ccl2/Il6/Syk	10
GO:0050863	BP	GO:0050863	regulation of T cell activation	10/51	411/28891	2.31297e-09	9.67163e-08	3.54835e-08	Il4ra/Fas/Il2rg/Il1a/Tnfsf9/H2-Q4/Il1b/Ccl2/Il6/Syk	10
GO:0050764	BP	GO:0050764	regulation of phagocytosis	7/51	127/28891	2.64605e-09	1.08633e-07	3.98554e-08	Fcer1g/Il2rg/Fcgr2b/Il1b/Ccl2/Fgr/Syk	7
GO:0002440	BP	GO:0002440	production of molecular mediator of immune response	10/51	425/28891	3.1865e-09	1.28484e-07	4.71386e-08	Il4ra/Fas/Fcer1g/Fcgr2b/H2-Q4/Il1b/Rsad2/Tnfaip3/Il6/Syk	10
GO:1902107	BP	GO:1902107	positive regulation of leukocyte differentiation	8/51	213/28891	3.71103e-09	1.44474e-07	5.30051e-08	Il4ra/Il2rg/Ccl3/Tnfsf9/Lif/Il6/Syk/Fos	8
GO:1903708	BP	GO:1903708	positive regulation of hemopoiesis	8/51	213/28891	3.71103e-09	1.44474e-07	5.30051e-08	Il4ra/Il2rg/Ccl3/Tnfsf9/Lif/Il6/Syk/Fos	8
GO:0071621	BP	GO:0071621	granulocyte chemotaxis	7/51	135/28891	4.05575e-09	1.55219e-07	5.6947e-08	Cxcl10/Fcer1g/Ccl3/Il1b/Ccl2/Ccl4/Syk	7
GO:0007159	BP	GO:0007159	leukocyte cell-cell adhesion	10/51	447/28891	5.15643e-09	1.94054e-07	7.11949e-08	Il4ra/Icam1/Il2rg/Il1a/Tnfsf9/H2-Q4/Il1b/Ccl2/Il6/Syk	10
GO:0002699	BP	GO:0002699	positive regulation of immune effector process	9/51	326/28891	5.32905e-09	1.97262e-07	7.2372e-08	Il4ra/Fcer1g/H2-Q4/Il1b/Ccl2/Rsad2/Fgr/Il6/Syk	9
GO:0062207	BP	GO:0062207	regulation of pattern recognition receptor signaling pathway	7/51	141/28891	5.49234e-09	2.00028e-07	7.33866e-08	Cd14/Gbp2/Trim30a/Eif2ak2/Rsad2/Tnfaip3/Irf7	7
GO:0051607	BP	GO:0051607	defense response to virus	9/51	328/28891	5.61965e-09	2.01415e-07	7.38958e-08	Cxcl10/Ifih1/Trim30a/Il1b/Eif2ak2/Rsad2/Tnfaip3/Irf7/Il6	9
GO:0140546	BP	GO:0140546	defense response to symbiont	9/51	329/28891	5.7701e-09	2.03576e-07	7.46886e-08	Cxcl10/Ifih1/Trim30a/Il1b/Eif2ak2/Rsad2/Tnfaip3/Irf7/Il6	9
GO:0060326	BP	GO:0060326	cell chemotaxis	9/51	331/28891	6.08163e-09	2.11267e-07	7.75101e-08	Cxcl10/Fcer1g/Ccl3/Fgf2/Il1b/Ccl2/Ccrl2/Ccl4/Syk	9
GO:0002366	BP	GO:0002366	leukocyte activation involved in immune response	9/51	333/28891	6.40783e-09	2.19226e-07	8.043e-08	Il4ra/Icam1/Fcer1g/Bcl3/Relb/Fgr/Tnfaip3/Il6/Syk	9
GO:0006935	BP	GO:0006935	chemotaxis	10/51	462/28891	7.05739e-09	2.3598e-07	8.65771e-08	Cxcl10/Fcer1g/Ccl3/Fgf2/Ccn1/Il1b/Ccl2/Ccrl2/Ccl4/Syk	10
GO:0002263	BP	GO:0002263	cell activation involved in immune response	9/51	337/28891	7.10658e-09	2.3598e-07	8.65771e-08	Il4ra/Icam1/Fcer1g/Bcl3/Relb/Fgr/Tnfaip3/Il6/Syk	9
GO:0042330	BP	GO:0042330	taxis	10/51	464/28891	7.35287e-09	2.4062e-07	8.82793e-08	Cxcl10/Fcer1g/Ccl3/Fgf2/Ccn1/Il1b/Ccl2/Ccrl2/Ccl4/Syk	10
GO:0002822	BP	GO:0002822	regulation of adaptive immune response based on somatic recombination of immune receptors built from immunoglobulin superfamily domains	8/51	236/28891	8.2828e-09	2.6718e-07	9.80236e-08	Il4ra/Fcer1g/Fcgr2b/H2-Q4/Il1b/Rsad2/Tnfaip3/Il6	8
GO:0070374	BP	GO:0070374	positive regulation of ERK1 and ERK2 cascade	8/51	239/28891	9.14102e-09	2.9071e-07	1.06656e-07	Icam1/Ccl3/Il1a/Fgf2/Il1b/Ccl2/Ccl4/Il6	8
GO:0032722	BP	GO:0032722	positive regulation of chemokine production	6/51	86/28891	9.42529e-09	2.95588e-07	1.08446e-07	Il4ra/Ccn1/Il1b/Eif2ak2/Il6/Syk	6
GO:0006909	BP	GO:0006909	phagocytosis	8/51	242/28891	1.00751e-08	3.11637e-07	1.14334e-07	Msr1/Fcer1g/Il2rg/Fcgr2b/Il1b/Ccl2/Fgr/Syk	8
GO:0140375	MF	GO:0140375	immune receptor activity	7/51	138/28407	5.30562e-09	3.71393e-07	1.73131e-07	Il4ra/Csf2rb/Fcer1g/Il2rg/Il13ra1/Fcgr2b/Ccrl2	7
GO:1902105	BP	GO:1902105	regulation of leukocyte differentiation	9/51	363/28891	1.35099e-08	4.12234e-07	1.51242e-07	Il4ra/Fas/Il2rg/Ccl3/Tnfsf9/Lif/Il6/Syk/Fos	9
GO:0097529	BP	GO:0097529	myeloid leukocyte migration	8/51	253/28891	1.4242e-08	4.28779e-07	1.57312e-07	Cxcl10/Fcer1g/Ccl3/Il1a/Il1b/Ccl2/Ccl4/Syk	8
GO:0051251	BP	GO:0051251	positive regulation of lymphocyte activation	9/51	367/28891	1.48482e-08	4.41148e-07	1.6185e-07	Il4ra/Il2rg/Il1a/Tnfsf9/H2-Q4/Il1b/Ccl2/Il6/Syk	9
GO:0002702	BP	GO:0002702	positive regulation of production of molecular mediator of immune response	7/51	171/28891	2.09157e-08	6.13345e-07	2.25026e-07	Il4ra/Fcer1g/H2-Q4/Il1b/Rsad2/Il6/Syk	7
GO:0043367	BP	GO:0043367	CD4-positive, alpha-beta T cell differentiation	6/51	99/28891	2.20766e-08	6.39088e-07	2.3447e-07	Il4ra/Il2rg/Bcl3/Relb/Rsad2/Il6	6
GO:0051091	BP	GO:0051091	positive regulation of DNA-binding transcription factor activity	8/51	269/28891	2.29248e-08	6.55243e-07	2.40397e-07	Icam1/Trim30a/Fcgr2b/Il1b/Eif2ak2/Ikbke/Csf3/Il6	8
GO:0050900	BP	GO:0050900	leukocyte migration	9/51	398/28891	2.98022e-08	8.41166e-07	3.08609e-07	Icam1/Cxcl10/Fcer1g/Ccl3/Il1a/Il1b/Ccl2/Ccl4/Syk	9
GO:0050727	BP	GO:0050727	regulation of inflammatory response	9/51	411/28891	3.92366e-08	1.09378e-06	4.01289e-07	Socs3/Fcer1g/Nfkbia/Ccl3/Fcgr2b/H2-Q4/Il1b/Tnfaip3/Il6	9
GO:0002720	BP	GO:0002720	positive regulation of cytokine production involved in immune response	6/51	114/28891	5.15006e-08	1.41815e-06	5.20295e-07	Fcer1g/H2-Q4/Il1b/Rsad2/Il6/Syk	6
GO:0032642	BP	GO:0032642	regulation of chemokine production	6/51	116/28891	5.71463e-08	1.55094e-06	5.69013e-07	Il4ra/Ccn1/Il1b/Eif2ak2/Il6/Syk	6
GO:0042742	BP	GO:0042742	defense response to bacterium	9/51	430/28891	5.76966e-08	1.55094e-06	5.69013e-07	Fcer1g/Gbp2/Bcl3/Lcn2/H2-Q4/Il1b/Tnfsf8/Fgr/Syk	9
GO:0019724	BP	GO:0019724	B cell mediated immunity	8/51	306/28891	6.19813e-08	1.64651e-06	6.04078e-07	Il4ra/Csf2rb/Fas/Fcer1g/Bcl3/Fcgr2b/H2-Q4/Irf7	8
GO:0070665	BP	GO:0070665	positive regulation of leukocyte proliferation	7/51	202/28891	6.5668e-08	1.72417e-06	6.32567e-07	Csf2rb/Il1a/Tnfsf9/H2-Q4/Il1b/Il6/Syk	7
GO:0045807	BP	GO:0045807	positive regulation of endocytosis	7/51	204/28891	7.0242e-08	1.82306e-06	6.6885e-07	Fcer1g/Il2rg/Cd14/Fcgr2b/Il1b/Ccl2/Syk	7
GO:0070663	BP	GO:0070663	regulation of leukocyte proliferation	8/51	313/28891	7.37403e-08	1.89211e-06	6.94182e-07	Csf2rb/Il1a/Tnfsf9/Fcgr2b/H2-Q4/Il1b/Il6/Syk	8
GO:0034612	BP	GO:0034612	response to tumor necrosis factor	7/51	206/28891	7.50826e-08	1.9049e-06	6.98877e-07	Nfkbia/Cd14/Ccl3/Ccl2/Ccl4/Il6/Syk	7
GO:0032602	BP	GO:0032602	chemokine production	6/51	126/28891	9.35958e-08	2.34821e-06	8.61519e-07	Il4ra/Ccn1/Il1b/Eif2ak2/Il6/Syk	6
GO:0032653	BP	GO:0032653	regulation of interleukin-10 production	5/51	64/28891	9.87659e-08	2.4507e-06	8.99118e-07	Fcer1g/Bcl3/Fcgr2b/Il6/Syk	5
GO:0030522	BP	GO:0030522	intracellular receptor signaling pathway	8/51	328/28891	1.05556e-07	2.54582e-06	9.34018e-07	Nfkbia/Ifih1/Gbp2/Trim30a/Eif2ak2/Rsad2/Tnfaip3/Irf7	8
GO:0033008	BP	GO:0033008	positive regulation of mast cell activation involved in immune response	4/51	25/28891	1.05982e-07	2.54582e-06	9.34018e-07	Il4ra/Fcer1g/Fgr/Syk	4
GO:0043306	BP	GO:0043306	positive regulation of mast cell degranulation	4/51	25/28891	1.05982e-07	2.54582e-06	9.34018e-07	Il4ra/Fcer1g/Fgr/Syk	4
GO:0002286	BP	GO:0002286	T cell activation involved in immune response	6/51	130/28891	1.12722e-07	2.67923e-06	9.82962e-07	Il4ra/Icam1/Fcer1g/Bcl3/Relb/Il6	6
GO:0035710	BP	GO:0035710	CD4-positive, alpha-beta T cell activation	6/51	131/28891	1.17975e-07	2.77487e-06	1.01805e-06	Il4ra/Il2rg/Bcl3/Relb/Rsad2/Il6	6
GO:0032613	BP	GO:0032613	interleukin-10 production	5/51	67/28891	1.24605e-07	2.88214e-06	1.05741e-06	Fcer1g/Bcl3/Fcgr2b/Il6/Syk	5
GO:0070498	BP	GO:0070498	interleukin-1-mediated signaling pathway	4/51	26/28891	1.25089e-07	2.88214e-06	1.05741e-06	Nfkbia/Il1b/Il1rn/Il6	4
GO:0019882	BP	GO:0019882	antigen processing and presentation	6/51	134/28891	1.34957e-07	3.07811e-06	1.1293e-06	Icam1/Fcer1g/Fcgr2b/H2-Q4/Relb/Psmb8	6
GO:0002285	BP	GO:0002285	lymphocyte activation involved in immune response	7/51	227/28891	1.45426e-07	3.2621e-06	1.19681e-06	Il4ra/Icam1/Fcer1g/Bcl3/Relb/Tnfaip3/Il6	7
GO:0030099	BP	GO:0030099	myeloid cell differentiation	9/51	480/28891	1.46649e-07	3.2621e-06	1.19681e-06	Fas/Fcer1g/Nfkbia/Ccl3/Tnfsf9/Relb/Lif/Csf3/Fos	9
GO:0032479	BP	GO:0032479	regulation of type I interferon production	6/51	136/28891	1.47358e-07	3.2621e-06	1.19681e-06	Cd14/Ifih1/Relb/Ikbke/Irf7/Syk	6
GO:0030100	BP	GO:0030100	regulation of endocytosis	8/51	344/28891	1.51868e-07	3.3293e-06	1.22146e-06	Fcer1g/Il2rg/Cd14/Fcgr2b/Il1b/Ccl2/Fgr/Syk	8
GO:0070098	BP	GO:0070098	chemokine-mediated signaling pathway	5/51	70/28891	1.55536e-07	3.37692e-06	1.23893e-06	Cxcl10/Ccl3/Ccl2/Ccrl2/Ccl4	5
GO:0042102	BP	GO:0042102	positive regulation of T cell proliferation	6/51	140/28891	1.74982e-07	3.76294e-06	1.38056e-06	Il1a/Tnfsf9/H2-Q4/Il1b/Il6/Syk	6
GO:0001776	BP	GO:0001776	leukocyte homeostasis	6/51	141/28891	1.82515e-07	3.85157e-06	1.41307e-06	Fas/Fcer1g/Fcgr2b/Ccl2/Tnfaip3/Il6	6
GO:0032606	BP	GO:0032606	type I interferon production	6/51	141/28891	1.82515e-07	3.85157e-06	1.41307e-06	Cd14/Ifih1/Relb/Ikbke/Irf7/Syk	6
GO:0030595	BP	GO:0030595	leukocyte chemotaxis	7/51	240/28891	2.12135e-07	4.43519e-06	1.62719e-06	Cxcl10/Fcer1g/Ccl3/Il1b/Ccl2/Ccl4/Syk	7
GO:0032677	BP	GO:0032677	regulation of interleukin-8 production	5/51	75/28891	2.20333e-07	4.56434e-06	1.67458e-06	Cd14/Bcl3/Il1b/Il6/Syk	5
GO:0032637	BP	GO:0032637	interleukin-8 production	5/51	76/28891	2.35537e-07	4.83493e-06	1.77385e-06	Cd14/Bcl3/Il1b/Il6/Syk	5
GO:0050864	BP	GO:0050864	regulation of B cell activation	6/51	148/28891	2.4307e-07	4.94462e-06	1.8141e-06	Fas/Il2rg/Fcgr2b/Tnfaip3/Il6/Syk	6
GO:0038156	BP	GO:0038156	interleukin-3-mediated signaling pathway	3/51	8/28891	2.88386e-07	5.81407e-06	2.13308e-06	Csf2rb/Fcer1g/Syk	3
GO:1990868	BP	GO:1990868	response to chemokine	5/51	80/28891	3.04865e-07	6.03847e-06	2.21541e-06	Cxcl10/Ccl3/Ccl2/Ccrl2/Ccl4	5
GO:1990869	BP	GO:1990869	cellular response to chemokine	5/51	80/28891	3.04865e-07	6.03847e-06	2.21541e-06	Cxcl10/Ccl3/Ccl2/Ccrl2/Ccl4	5
GO:0002718	BP	GO:0002718	regulation of cytokine production involved in immune response	6/51	155/28891	3.19246e-07	6.26834e-06	2.29974e-06	Fcer1g/H2-Q4/Il1b/Rsad2/Il6/Syk	6
GO:0060759	BP	GO:0060759	regulation of response to cytokine stimulus	6/51	156/28891	3.31573e-07	6.45424e-06	2.36795e-06	Ifih1/Il1rn/Ikbke/Irf7/Il6/Syk	6
GO:0002673	BP	GO:0002673	regulation of acute inflammatory response	5/51	82/28891	3.45104e-07	6.6155e-06	2.42711e-06	Fcer1g/Fcgr2b/H2-Q4/Il1b/Il6	5
GO:0007249	BP	GO:0007249	I-kappaB kinase/NF-kappaB signaling	7/51	258/28891	3.45717e-07	6.6155e-06	2.42711e-06	Nfkbia/Il1a/Trim30a/Bcl3/Relb/Il1b/Tnfaip3	7
GO:0002292	BP	GO:0002292	T cell differentiation involved in immune response	5/51	83/28891	3.66739e-07	6.95879e-06	2.55306e-06	Il4ra/Fcer1g/Bcl3/Relb/Il6	5
GO:0032481	BP	GO:0032481	positive regulation of type I interferon production	5/51	85/28891	4.13224e-07	7.77549e-06	2.85269e-06	Cd14/Ifih1/Ikbke/Irf7/Syk	5
GO:0010574	BP	GO:0010574	regulation of vascular endothelial growth factor production	4/51	35/28891	4.33001e-07	8.08029e-06	2.96452e-06	Il1a/Il1b/Ccl2/Il6	4
GO:0002573	BP	GO:0002573	myeloid leukocyte differentiation	7/51	272/28891	4.93273e-07	9.08612e-06	3.33354e-06	Fcer1g/Ccl3/Tnfsf9/Relb/Lif/Csf3/Fos	7
GO:0050729	BP	GO:0050729	positive regulation of inflammatory response	6/51	167/28891	4.94948e-07	9.08612e-06	3.33354e-06	Fcer1g/Nfkbia/Ccl3/H2-Q4/Il1b/Il6	6
GO:0033005	BP	GO:0033005	positive regulation of mast cell activation	4/51	37/28891	5.44751e-07	9.84039e-06	3.61027e-06	Il4ra/Fcer1g/Fgr/Syk	4
GO:0043302	BP	GO:0043302	positive regulation of leukocyte degranulation	4/51	37/28891	5.44751e-07	9.84039e-06	3.61027e-06	Il4ra/Fcer1g/Fgr/Syk	4
GO:0002274	BP	GO:0002274	myeloid leukocyte activation	7/51	280/28891	5.99155e-07	1.07372e-05	3.93931e-06	Il4ra/Fcer1g/Lcp2/Tnfsf9/Relb/Fgr/Syk	7
GO:0043304	BP	GO:0043304	regulation of mast cell degranulation	4/51	38/28891	6.08048e-07	1.08108e-05	3.9663e-06	Il4ra/Fcer1g/Fgr/Syk	4
GO:0039531	BP	GO:0039531	regulation of viral-induced cytoplasmic pattern recognition receptor signaling pathway	5/51	92/28891	6.13791e-07	1.08277e-05	3.97248e-06	Gbp2/Trim30a/Eif2ak2/Rsad2/Tnfaip3	5
GO:0050766	BP	GO:0050766	positive regulation of phagocytosis	5/51	93/28891	6.47805e-07	1.13391e-05	4.16012e-06	Fcer1g/Il2rg/Fcgr2b/Il1b/Ccl2	5
GO:0010573	BP	GO:0010573	vascular endothelial growth factor production	4/51	39/28891	6.76658e-07	1.1753e-05	4.31198e-06	Il1a/Il1b/Ccl2/Il6	4
GO:0050670	BP	GO:0050670	regulation of lymphocyte proliferation	7/51	286/28891	6.90566e-07	1.1903e-05	4.36702e-06	Il1a/Tnfsf9/Fcgr2b/H2-Q4/Il1b/Il6/Syk	7
GO:0002367	BP	GO:0002367	cytokine production involved in immune response	6/51	178/28891	7.19215e-07	1.23029e-05	4.51374e-06	Fcer1g/H2-Q4/Il1b/Rsad2/Il6/Syk	6
GO:0019955	MF	GO:0019955	cytokine binding	6/51	145/28407	2.3759e-07	1.24735e-05	5.8147e-06	Il2rg/Gbp2/Il13ra1/Fgf2/Ccrl2/Il1rn	6
GO:0070661	BP	GO:0070661	leukocyte proliferation	8/51	425/28891	7.51818e-07	1.2764e-05	4.68287e-06	Csf2rb/Il1a/Tnfsf9/Fcgr2b/H2-Q4/Il1b/Il6/Syk	8
GO:0032944	BP	GO:0032944	regulation of mononuclear cell proliferation	7/51	290/28891	7.57797e-07	1.27695e-05	4.68489e-06	Il1a/Tnfsf9/Fcgr2b/H2-Q4/Il1b/Il6/Syk	7
GO:0045576	BP	GO:0045576	mast cell activation	5/51	97/28891	7.99047e-07	1.33648e-05	4.90331e-06	Il4ra/Fcer1g/Lcp2/Fgr/Syk	5
GO:0030183	BP	GO:0030183	B cell differentiation	6/51	182/28891	8.18967e-07	1.35973e-05	4.9886e-06	Fas/Il2rg/Bcl3/Tnfaip3/Il6/Syk	6
GO:0033006	BP	GO:0033006	regulation of mast cell activation involved in immune response	4/51	41/28891	8.30957e-07	1.36956e-05	5.02469e-06	Il4ra/Fcer1g/Fgr/Syk	4
GO:0050671	BP	GO:0050671	positive regulation of lymphocyte proliferation	6/51	183/28891	8.45598e-07	1.38359e-05	5.07617e-06	Il1a/Tnfsf9/H2-Q4/Il1b/Il6/Syk	6
GO:0043254	BP	GO:0043254	regulation of protein-containing complex assembly	8/51	437/28891	9.26205e-07	1.48896e-05	5.46275e-06	Fas/Icam1/Gbp2/Trim30a/Eif2ak2/Ikbke/Csf3/Syk	8
GO:0032946	BP	GO:0032946	positive regulation of mononuclear cell proliferation	6/51	186/28891	9.29778e-07	1.48896e-05	5.46275e-06	Il1a/Tnfsf9/H2-Q4/Il1b/Il6/Syk	6
GO:0071356	BP	GO:0071356	cellular response to tumor necrosis factor	6/51	186/28891	9.29778e-07	1.48896e-05	5.46275e-06	Nfkbia/Ccl3/Ccl2/Ccl4/Il6/Syk	6
GO:0032611	BP	GO:0032611	interleukin-1 beta production	5/51	101/28891	9.76887e-07	1.55339e-05	5.69911e-06	Ccl3/Ccn1/Il1b/Tnfaip3/Il6	5
GO:0002335	BP	GO:0002335	mature B cell differentiation	4/51	43/28891	1.00999e-06	1.57057e-05	5.76214e-06	Il2rg/Bcl3/Tnfaip3/Il6	4
GO:0032733	BP	GO:0032733	positive regulation of interleukin-10 production	4/51	43/28891	1.00999e-06	1.57057e-05	5.76214e-06	Fcer1g/Bcl3/Il6/Syk	4
GO:0042832	BP	GO:0042832	defense response to protozoan	4/51	43/28891	1.00999e-06	1.57057e-05	5.76214e-06	Il4ra/Gbp2/Bcl3/Il6	4
GO:0016064	BP	GO:0016064	immunoglobulin mediated immune response	7/51	303/28891	1.01551e-06	1.57057e-05	5.76214e-06	Il4ra/Csf2rb/Fcer1g/Bcl3/Fcgr2b/H2-Q4/Irf7	7
GO:0002886	BP	GO:0002886	regulation of myeloid leukocyte mediated immunity	5/51	102/28891	1.02588e-06	1.57581e-05	5.78136e-06	Il4ra/Fcer1g/H2-Q4/Fgr/Syk	5
GO:0045580	BP	GO:0045580	regulation of T cell differentiation	6/51	190/28891	1.05258e-06	1.59511e-05	5.85219e-06	Il4ra/Fas/Il2rg/Tnfsf9/Il6/Syk	6
GO:1905952	BP	GO:1905952	regulation of lipid localization	6/51	190/28891	1.05258e-06	1.59511e-05	5.85219e-06	Msr1/Nfkbia/Il1a/Il1b/Ikbke/Syk	6
GO:0046635	BP	GO:0046635	positive regulation of alpha-beta T cell activation	5/51	103/28891	1.07679e-06	1.62093e-05	5.94691e-06	Il4ra/Il2rg/H2-Q4/Il6/Syk	5
GO:0045765	BP	GO:0045765	regulation of angiogenesis	7/51	307/28891	1.10823e-06	1.64826e-05	6.04718e-06	Cxcl10/Il1a/Fgf2/Il1b/Ccl2/Lif/Cybb	7
GO:0006953	BP	GO:0006953	acute-phase response	4/51	44/28891	1.10955e-06	1.64826e-05	6.04718e-06	Il1a/Il1b/Il1rn/Il6	4
GO:0033077	BP	GO:0033077	T cell differentiation in thymus	5/51	105/28891	1.18459e-06	1.74823e-05	6.41396e-06	Fas/Il2rg/Il1a/Tnfsf9/Il1b	5
GO:1901342	BP	GO:1901342	regulation of vasculature development	7/51	311/28891	1.20795e-06	1.77114e-05	6.498e-06	Cxcl10/Il1a/Fgf2/Il1b/Ccl2/Lif/Cybb	7
GO:0001659	BP	GO:0001659	temperature homeostasis	6/51	195/28891	1.22443e-06	1.78372e-05	6.54414e-06	Il4ra/Il1a/Lcn2/Il1b/Il1rn/Syk	6
GO:0002705	BP	GO:0002705	positive regulation of leukocyte mediated immunity	6/51	197/28891	1.29929e-06	1.87071e-05	6.86331e-06	Fcer1g/H2-Q4/Il1b/Ccl2/Rsad2/Il6	6
GO:0002437	BP	GO:0002437	inflammatory response to antigenic stimulus	5/51	107/28891	1.30072e-06	1.87071e-05	6.86331e-06	Icam1/Fcer1g/Fcgr2b/H2-Q4/Il1rn	5
GO:0042379	MF	GO:0042379	chemokine receptor binding	5/51	85/28407	4.48836e-07	1.88511e-05	8.78774e-06	Cxcl10/Ccl3/Ccl2/Ccrl2/Ccl4	5
GO:0042113	BP	GO:0042113	B cell activation	7/51	320/28891	1.46011e-06	2.08666e-05	7.65561e-06	Fas/Il2rg/Bcl3/Fcgr2b/Tnfaip3/Il6/Syk	7
GO:0018108	BP	GO:0018108	peptidyl-tyrosine phosphorylation	7/51	322/28891	1.52175e-06	2.16108e-05	7.92864e-06	Icam1/Socs3/Fgr/Lif/Csf3/Il6/Syk	7
GO:0001562	BP	GO:0001562	response to protozoan	4/51	48/28891	1.58212e-06	2.22373e-05	8.15848e-06	Il4ra/Gbp2/Bcl3/Il6	4
GO:0018212	BP	GO:0018212	peptidyl-tyrosine modification	7/51	324/28891	1.58557e-06	2.22373e-05	8.15848e-06	Icam1/Socs3/Fgr/Lif/Csf3/Il6/Syk	7
GO:0072676	BP	GO:0072676	lymphocyte migration	5/51	112/28891	1.63056e-06	2.27271e-05	8.33819e-06	Icam1/Cxcl10/Ccl3/Ccl2/Ccl4	5
GO:0002637	BP	GO:0002637	regulation of immunoglobulin production	5/51	113/28891	1.70378e-06	2.36021e-05	8.6592e-06	Il4ra/Fcgr2b/H2-Q4/Tnfaip3/Il6	5
GO:0001660	BP	GO:0001660	fever generation	3/51	14/28891	1.86054e-06	2.55591e-05	9.37721e-06	Il1a/Il1b/Il1rn	3
GO:0042092	BP	GO:0042092	type 2 immune response	4/51	50/28891	1.8677e-06	2.55591e-05	9.37721e-06	Il4ra/Bcl3/Rsad2/Il6	4
GO:0004896	MF	GO:0004896	cytokine receptor activity	5/51	96/28407	8.2406e-07	2.88421e-05	1.34452e-05	Il4ra/Csf2rb/Il2rg/Il13ra1/Ccrl2	5
GO:0042088	BP	GO:0042088	T-helper 1 type immune response	4/51	53/28891	2.36551e-06	3.1984e-05	1.17344e-05	Il4ra/Bcl3/Relb/Il1b	4
GO:0046638	BP	GO:0046638	positive regulation of alpha-beta T cell differentiation	4/51	53/28891	2.36551e-06	3.1984e-05	1.17344e-05	Il4ra/Il2rg/Il6/Syk	4
GO:0032612	BP	GO:0032612	interleukin-1 production	5/51	122/28891	2.48626e-06	3.34165e-05	1.22599e-05	Ccl3/Ccn1/Il1b/Tnfaip3/Il6	5
GO:0048247	BP	GO:0048247	lymphocyte chemotaxis	4/51	54/28891	2.55143e-06	3.40896e-05	1.25069e-05	Cxcl10/Ccl3/Ccl2/Ccl4	4
GO:0045619	BP	GO:0045619	regulation of lymphocyte differentiation	6/51	224/28891	2.7339e-06	3.63126e-05	1.33225e-05	Il4ra/Fas/Il2rg/Tnfsf9/Il6/Syk	6
GO:0045582	BP	GO:0045582	positive regulation of T cell differentiation	5/51	125/28891	2.80185e-06	3.69975e-05	1.35737e-05	Il4ra/Il2rg/Tnfsf9/Il6/Syk	5
GO:0033084	BP	GO:0033084	regulation of immature T cell proliferation in thymus	3/51	16/28891	2.85525e-06	3.74834e-05	1.3752e-05	Il1a/Tnfsf9/Il1b	3
GO:1905954	BP	GO:1905954	positive regulation of lipid localization	5/51	126/28891	2.91376e-06	3.80304e-05	1.39527e-05	Msr1/Nfkbia/Il1a/Il1b/Ikbke	5
GO:0042129	BP	GO:0042129	regulation of T cell proliferation	6/51	227/28891	2.95188e-06	3.83066e-05	1.4054e-05	Il1a/Tnfsf9/H2-Q4/Il1b/Il6/Syk	6
GO:0043300	BP	GO:0043300	regulation of leukocyte degranulation	4/51	57/28891	3.17443e-06	4.09592e-05	1.50272e-05	Il4ra/Fcer1g/Fgr/Syk	4
GO:0043406	BP	GO:0043406	positive regulation of MAP kinase activity	5/51	130/28891	3.39703e-06	4.34396e-05	1.59372e-05	Fgf2/Pik3r5/Il1b/Il1rn/Syk	5
GO:0032757	BP	GO:0032757	positive regulation of interleukin-8 production	4/51	58/28891	3.40514e-06	4.34396e-05	1.59372e-05	Cd14/Il1b/Il6/Syk	4
GO:0033083	BP	GO:0033083	regulation of immature T cell proliferation	3/51	17/28891	3.46277e-06	4.39266e-05	1.61159e-05	Il1a/Tnfsf9/Il1b	3
GO:0031663	BP	GO:0031663	lipopolysaccharide-mediated signaling pathway	4/51	59/28891	3.64804e-06	4.60183e-05	1.68833e-05	Nfkbia/Cd14/Trim30a/Tnfaip3	4
GO:0008009	MF	GO:0008009	chemokine activity	4/51	47/28407	1.55222e-06	4.65666e-05	2.17077e-05	Cxcl10/Ccl3/Ccl2/Ccl4	4
GO:0045637	BP	GO:0045637	regulation of myeloid cell differentiation	6/51	237/28891	3.7832e-06	4.74581e-05	1.74115e-05	Fas/Nfkbia/Ccl3/Lif/Csf3/Fos	6
GO:0042060	BP	GO:0042060	wound healing	7/51	370/28891	3.80717e-06	4.7495e-05	1.74251e-05	Fcer1g/Il1a/Fgf2/Ccn1/Ccl2/Il6/Syk	7
GO:0002675	BP	GO:0002675	positive regulation of acute inflammatory response	4/51	60/28891	3.90353e-06	4.81649e-05	1.76709e-05	Fcer1g/H2-Q4/Il1b/Il6	4
GO:0033003	BP	GO:0033003	regulation of mast cell activation	4/51	60/28891	3.90353e-06	4.81649e-05	1.76709e-05	Il4ra/Fcer1g/Fgr/Syk	4
GO:0002830	BP	GO:0002830	positive regulation of type 2 immune response	3/51	18/28891	4.15015e-06	5.03768e-05	1.84824e-05	Il4ra/Rsad2/Il6	3
GO:0033080	BP	GO:0033080	immature T cell proliferation in thymus	3/51	18/28891	4.15015e-06	5.03768e-05	1.84824e-05	Il1a/Tnfsf9/Il1b	3
GO:0002706	BP	GO:0002706	regulation of lymphocyte mediated immunity	6/51	241/28891	4.16497e-06	5.03768e-05	1.84824e-05	Fcer1g/Fcgr2b/H2-Q4/Il1b/Rsad2/Il6	6
GO:0002438	BP	GO:0002438	acute inflammatory response to antigenic stimulus	4/51	61/28891	4.17204e-06	5.03768e-05	1.84824e-05	Icam1/Fcer1g/Fcgr2b/H2-Q4	4
GO:0097191	BP	GO:0097191	extrinsic apoptotic signaling pathway	6/51	242/28891	4.26516e-06	5.12273e-05	1.87944e-05	Fas/Icam1/Il1a/Lcn2/Il1b/Tnfaip3	6
GO:0003158	BP	GO:0003158	endothelium development	5/51	137/28891	4.39237e-06	5.24761e-05	1.92526e-05	Icam1/Cxcl10/Lcn2/Stc1/Il1b	5
GO:0046651	BP	GO:0046651	lymphocyte proliferation	7/51	383/28891	4.77392e-06	5.67342e-05	2.08148e-05	Il1a/Tnfsf9/Fcgr2b/H2-Q4/Il1b/Il6/Syk	7
GO:0033079	BP	GO:0033079	immature T cell proliferation	3/51	19/28891	4.92217e-06	5.81898e-05	2.13488e-05	Il1a/Tnfsf9/Il1b	3
GO:0045621	BP	GO:0045621	positive regulation of lymphocyte differentiation	5/51	141/28891	5.056e-06	5.91972e-05	2.17184e-05	Il4ra/Il2rg/Tnfsf9/Il6/Syk	5
GO:1903307	BP	GO:1903307	positive regulation of regulated secretory pathway	4/51	64/28891	5.05982e-06	5.91972e-05	2.17184e-05	Il4ra/Fcer1g/Fgr/Syk	4
GO:0032943	BP	GO:0032943	mononuclear cell proliferation	7/51	389/28891	5.28464e-06	6.15089e-05	2.25665e-05	Il1a/Tnfsf9/Fcgr2b/H2-Q4/Il1b/Il6/Syk	7
GO:1903532	BP	GO:1903532	positive regulation of secretion by cell	7/51	390/28891	5.37403e-06	6.20328e-05	2.27588e-05	Il4ra/Fcer1g/Il1a/Il1b/Fgr/Lif/Syk	7
GO:0002548	BP	GO:0002548	monocyte chemotaxis	4/51	65/28891	5.3846e-06	6.20328e-05	2.27588e-05	Cxcl10/Ccl3/Ccl2/Ccl4	4
GO:0001959	BP	GO:0001959	regulation of cytokine-mediated signaling pathway	5/51	146/28891	5.9934e-06	6.8349e-05	2.50761e-05	Il1rn/Ikbke/Irf7/Il6/Syk	5
GO:0046634	BP	GO:0046634	regulation of alpha-beta T cell activation	5/51	146/28891	5.9934e-06	6.8349e-05	2.50761e-05	Il4ra/Il2rg/H2-Q4/Il6/Syk	5
GO:0042063	BP	GO:0042063	gliogenesis	7/51	397/28891	6.03575e-06	6.8486e-05	2.51263e-05	Fas/Ccl3/Fgf2/Il1b/Ccl2/Lif/Il6	7
GO:0045064	BP	GO:0045064	T-helper 2 cell differentiation	3/51	21/28891	6.7391e-06	7.60844e-05	2.79141e-05	Il4ra/Bcl3/Il6	3
GO:0043303	BP	GO:0043303	mast cell degranulation	4/51	69/28891	6.83984e-06	7.68376e-05	2.81904e-05	Il4ra/Fcer1g/Fgr/Syk	4
GO:0050730	BP	GO:0050730	regulation of peptidyl-tyrosine phosphorylation	6/51	266/28891	7.32597e-06	8.18913e-05	3.00445e-05	Icam1/Socs3/Lif/Csf3/Il6/Syk	6
GO:0002448	BP	GO:0002448	mast cell mediated immunity	4/51	71/28891	7.6675e-06	8.52868e-05	3.12903e-05	Il4ra/Fcer1g/Fgr/Syk	4
GO:0048245	BP	GO:0048245	eosinophil chemotaxis	3/51	22/28891	7.79345e-06	8.62628e-05	3.16483e-05	Ccl3/Ccl2/Ccl4	3
GO:0042098	BP	GO:0042098	T cell proliferation	6/51	270/28891	7.97635e-06	8.78566e-05	3.2233e-05	Il1a/Tnfsf9/H2-Q4/Il1b/Il6/Syk	6
GO:0002279	BP	GO:0002279	mast cell activation involved in immune response	4/51	72/28891	8.10799e-06	8.8873e-05	3.2606e-05	Il4ra/Fcer1g/Fgr/Syk	4
GO:0071887	BP	GO:0071887	leukocyte apoptotic process	5/51	157/28891	8.5349e-06	9.29999e-05	3.41201e-05	Fas/Fcer1g/Bcl3/Fcgr2b/Il6	5
GO:1905330	BP	GO:1905330	regulation of morphogenesis of an epithelium	4/51	73/28891	8.56687e-06	9.29999e-05	3.41201e-05	Cxcl10/Fgf2/Lcn2/Lif	4
GO:0002444	BP	GO:0002444	myeloid leukocyte mediated immunity	5/51	158/28891	8.80214e-06	9.50968e-05	3.48894e-05	Il4ra/Fcer1g/H2-Q4/Fgr/Syk	5
GO:0031649	BP	GO:0031649	heat generation	3/51	23/28891	8.95132e-06	9.6248e-05	3.53117e-05	Il1a/Il1b/Il1rn	3
GO:0002377	BP	GO:0002377	immunoglobulin production	6/51	276/28891	9.03909e-06	9.63339e-05	3.53432e-05	Il4ra/Fas/Fcgr2b/H2-Q4/Tnfaip3/Il6	6
GO:0042093	BP	GO:0042093	T-helper cell differentiation	4/51	74/28891	9.04464e-06	9.63339e-05	3.53432e-05	Il4ra/Bcl3/Relb/Il6	4
GO:0002554	BP	GO:0002554	serotonin secretion by platelet	2/51	3/28891	9.15503e-06	9.7052e-05	3.56067e-05	Fcer1g/Syk	2
GO:0002294	BP	GO:0002294	CD4-positive, alpha-beta T cell differentiation involved in immune response	4/51	75/28891	9.54178e-06	9.9784e-05	3.6609e-05	Il4ra/Bcl3/Relb/Il6	4
GO:0046637	BP	GO:0046637	regulation of alpha-beta T cell differentiation	4/51	75/28891	9.54178e-06	9.9784e-05	3.6609e-05	Il4ra/Il2rg/Il6/Syk	4
GO:0033674	BP	GO:0033674	positive regulation of kinase activity	7/51	426/28891	9.54533e-06	9.9784e-05	3.6609e-05	Fgf2/Ccn1/Pik3r5/Il1b/Fgr/Il1rn/Syk	7
GO:0002293	BP	GO:0002293	alpha-beta T cell differentiation involved in immune response	4/51	76/28891	1.00588e-05	0.000104187	3.82244e-05	Il4ra/Bcl3/Relb/Il6	4
GO:0032623	BP	GO:0032623	interleukin-2 production	4/51	76/28891	1.00588e-05	0.000104187	3.82244e-05	Fcer1g/Il1a/Il1b/Tnfaip3	4
GO:0034114	BP	GO:0034114	regulation of heterotypic cell-cell adhesion	3/51	24/28891	1.02173e-05	0.000105346	3.86496e-05	Il1b/Il1rn/Tnfaip3	3
GO:0002287	BP	GO:0002287	alpha-beta T cell activation involved in immune response	4/51	77/28891	1.05962e-05	0.000108628	3.98537e-05	Il4ra/Bcl3/Relb/Il6	4
GO:0002429	BP	GO:0002429	immune response-activating cell surface receptor signaling pathway	6/51	284/28891	1.06319e-05	0.000108628	3.98537e-05	Fcer1g/Nfkbia/Cd14/Lcp2/Tnfaip3/Syk	6
GO:0002456	BP	GO:0002456	T cell mediated immunity	5/51	165/28891	1.08613e-05	0.000110472	4.05301e-05	Icam1/H2-Q4/Il1b/Rsad2/Il6	5
GO:0038034	BP	GO:0038034	signal transduction in absence of ligand	4/51	78/28891	1.11544e-05	0.000112235	4.1177e-05	Fas/Il1a/Lcn2/Il1b	4
GO:0097192	BP	GO:0097192	extrinsic apoptotic signaling pathway in absence of ligand	4/51	78/28891	1.11544e-05	0.000112235	4.1177e-05	Fas/Il1a/Lcn2/Il1b	4
GO:0002824	BP	GO:0002824	positive regulation of adaptive immune response based on somatic recombination of immune receptors built from immunoglobulin superfamily domains	5/51	166/28891	1.11837e-05	0.000112235	4.1177e-05	Fcer1g/H2-Q4/Il1b/Rsad2/Il6	5
GO:0051047	BP	GO:0051047	positive regulation of secretion	7/51	437/28891	1.12576e-05	0.000112476	4.12655e-05	Il4ra/Fcer1g/Il1a/Il1b/Fgr/Lif/Syk	7
GO:0002708	BP	GO:0002708	positive regulation of lymphocyte mediated immunity	5/51	170/28891	1.25491e-05	0.000124828	4.57972e-05	Fcer1g/H2-Q4/Il1b/Rsad2/Il6	5
GO:0002768	BP	GO:0002768	immune response-regulating cell surface receptor signaling pathway	6/51	294/28891	1.29351e-05	0.000127977	4.69524e-05	Fcer1g/Nfkbia/Cd14/Lcp2/Tnfaip3/Syk	6
GO:0002726	BP	GO:0002726	positive regulation of T cell cytokine production	3/51	26/28891	1.30924e-05	0.000127977	4.69524e-05	Il1b/Rsad2/Il6	3
GO:0032303	BP	GO:0032303	regulation of icosanoid secretion	3/51	26/28891	1.30924e-05	0.000127977	4.69524e-05	Il1a/Il1b/Syk	3
GO:0072677	BP	GO:0072677	eosinophil migration	3/51	26/28891	1.30924e-05	0.000127977	4.69524e-05	Ccl3/Ccl2/Ccl4	3
GO:0002220	BP	GO:0002220	innate immune response activating cell surface receptor signaling pathway	4/51	82/28891	1.36065e-05	0.000132428	4.85857e-05	Nfkbia/Cd14/Tnfaip3/Syk	4
GO:0048020	MF	GO:0048020	CCR chemokine receptor binding	4/51	63/28407	5.0752e-06	0.000133224	6.21044e-05	Ccl3/Ccl2/Ccrl2/Ccl4	4
GO:0002821	BP	GO:0002821	positive regulation of adaptive immune response	5/51	174/28891	1.40414e-05	0.000135493	4.97102e-05	Fcer1g/H2-Q4/Il1b/Rsad2/Il6	5
GO:0051250	BP	GO:0051250	negative regulation of lymphocyte activation	5/51	174/28891	1.40414e-05	0.000135493	4.97102e-05	Il4ra/Fas/Fcgr2b/Fgr/Tnfaip3	5
GO:0010575	BP	GO:0010575	positive regulation of vascular endothelial growth factor production	3/51	27/28891	1.47106e-05	0.000140748	5.1638e-05	Il1a/Il1b/Il6	3
GO:0035743	BP	GO:0035743	CD4-positive, alpha-beta T cell cytokine production	3/51	27/28891	1.47106e-05	0.000140748	5.1638e-05	Il1b/Rsad2/Il6	3
GO:0002687	BP	GO:0002687	positive regulation of leukocyte migration	5/51	176/28891	1.48376e-05	0.000141364	5.18641e-05	Icam1/Cxcl10/Il1a/Il1b/Ccl2	5
GO:0006925	BP	GO:0006925	inflammatory cell apoptotic process	3/51	28/28891	1.64554e-05	0.000156119	5.72772e-05	Fas/Fcgr2b/Il6	3
GO:1901652	BP	GO:1901652	response to peptide	7/51	464/28891	1.65665e-05	0.000156515	5.74227e-05	Serpina3f/Icam1/Socs3/Nfkbia/Fcgr2b/Il1b/Tnfaip3	7
GO:0032729	BP	GO:0032729	positive regulation of type II interferon production	4/51	87/28891	1.72037e-05	0.000161858	5.93831e-05	Cd14/Tnfsf9/Bcl3/Il1b	4
GO:0043523	BP	GO:0043523	regulation of neuron apoptotic process	6/51	310/28891	1.74472e-05	0.000163468	5.99735e-05	Fas/Ccl3/Lcn2/Fcgr2b/Il1b/Il6	6
GO:2000660	BP	GO:2000660	negative regulation of interleukin-1-mediated signaling pathway	2/51	4/28891	1.82894e-05	0.00017065	6.26087e-05	Il1rn/Il6	2
GO:0070851	MF	GO:0070851	growth factor receptor binding	5/51	151/28407	7.65904e-06	0.000171466	7.99315e-05	Fgf2/Il1b/Il1rn/Csf3/Il6	5
GO:0005178	MF	GO:0005178	integrin binding	5/51	153/28407	8.16505e-06	0.000171466	7.99315e-05	Icam1/Fgf2/Ccn1/Il1b/Syk	5
GO:0001818	BP	GO:0001818	negative regulation of cytokine production	6/51	314/28891	1.87535e-05	0.000174261	6.39333e-05	Trim30a/Bcl3/Fcgr2b/Relb/Tnfaip3/Il6	6
GO:0045834	BP	GO:0045834	positive regulation of lipid metabolic process	5/51	185/28891	1.88668e-05	0.000174595	6.4056e-05	Il1a/Fgf2/Ccn1/Il1b/Fgr	5
GO:0062197	BP	GO:0062197	cellular response to chemical stress	6/51	316/28891	1.94356e-05	0.000179125	6.57179e-05	Fas/Lcn2/Relb/Tnfaip3/Il6/Fos	6
GO:0031664	BP	GO:0031664	regulation of lipopolysaccharide-mediated signaling pathway	3/51	30/28891	2.03427e-05	0.000186342	6.83655e-05	Cd14/Trim30a/Tnfaip3	3
GO:1903531	BP	GO:1903531	negative regulation of secretion by cell	5/51	188/28891	2.03837e-05	0.000186342	6.83655e-05	Il1b/Rsad2/Il1rn/Lif/Il6	5
GO:0050731	BP	GO:0050731	positive regulation of peptidyl-tyrosine phosphorylation	5/51	189/28891	2.09099e-05	0.000190381	6.98474e-05	Icam1/Lif/Csf3/Il6/Syk	5
GO:0002711	BP	GO:0002711	positive regulation of T cell mediated immunity	4/51	93/28891	2.23911e-05	0.000203049	7.4495e-05	H2-Q4/Il1b/Rsad2/Il6	4
GO:0043525	BP	GO:0043525	positive regulation of neuron apoptotic process	4/51	94/28891	2.33559e-05	0.00021095	7.7394e-05	Fas/Ccl3/Lcn2/Il1b	4
GO:0032651	BP	GO:0032651	regulation of interleukin-1 beta production	4/51	95/28891	2.43509e-05	0.000219061	8.03696e-05	Ccl3/Ccn1/Tnfaip3/Il6	4
GO:0010623	BP	GO:0010623	programmed cell death involved in cell development	3/51	32/28891	2.47903e-05	0.000222129	8.14954e-05	Il1a/Fgf2/Il1b	3
GO:0043405	BP	GO:0043405	regulation of MAP kinase activity	5/51	197/28891	2.55103e-05	0.000227677	8.35307e-05	Fgf2/Pik3r5/Il1b/Il1rn/Syk	5
GO:0043299	BP	GO:0043299	leukocyte degranulation	4/51	97/28891	2.64337e-05	0.000234989	8.62135e-05	Il4ra/Fcer1g/Fgr/Syk	4
GO:0071674	BP	GO:0071674	mononuclear cell migration	5/51	199/28891	2.67746e-05	0.000237087	8.6983e-05	Icam1/Cxcl10/Ccl3/Ccl2/Ccl4	5
GO:0043372	BP	GO:0043372	positive regulation of CD4-positive, alpha-beta T cell differentiation	3/51	33/28891	2.72355e-05	0.000240225	8.81345e-05	Il4ra/Il2rg/Il6	3
GO:0071902	BP	GO:0071902	positive regulation of protein serine/threonine kinase activity	5/51	202/28891	2.87619e-05	0.000252702	9.27118e-05	Fgf2/Pik3r5/Il1b/Il1rn/Syk	5
GO:0050830	BP	GO:0050830	defense response to Gram-positive bacterium	5/51	203/28891	2.94491e-05	0.000257737	9.45592e-05	Gbp2/H2-Q4/Il1b/Tnfsf8/Fgr	5
GO:0002313	BP	GO:0002313	mature B cell differentiation involved in immune response	3/51	34/28891	2.9834e-05	0.000259097	9.50581e-05	Bcl3/Tnfaip3/Il6	3
GO:0002828	BP	GO:0002828	regulation of type 2 immune response	3/51	34/28891	2.9834e-05	0.000259097	9.50581e-05	Il4ra/Rsad2/Il6	3
GO:0002351	BP	GO:0002351	serotonin production involved in inflammatory response	2/51	5/28891	3.04478e-05	0.000261411	9.59073e-05	Fcer1g/Syk	2
GO:0002442	BP	GO:0002442	serotonin secretion involved in inflammatory response	2/51	5/28891	3.04478e-05	0.000261411	9.59073e-05	Fcer1g/Syk	2
GO:0060591	BP	GO:0060591	chondroblast differentiation	2/51	5/28891	3.04478e-05	0.000261411	9.59073e-05	Fgf2/Ccn1	2
GO:0071900	BP	GO:0071900	regulation of protein serine/threonine kinase activity	6/51	343/28891	3.07758e-05	0.000263046	9.65069e-05	Fgf2/Pik3r5/Il1b/Il1rn/Tnfaip3/Syk	6
GO:0019915	BP	GO:0019915	lipid storage	4/51	101/28891	3.09877e-05	0.000263046	9.65069e-05	Msr1/Nfkbia/Il1b/Ikbke	4
GO:0032890	BP	GO:0032890	regulation of organic acid transport	4/51	101/28891	3.09877e-05	0.000263046	9.65069e-05	Il1a/Il1b/Il1rn/Syk	4
GO:0002695	BP	GO:0002695	negative regulation of leukocyte activation	5/51	206/28891	3.15877e-05	0.000266138	9.76414e-05	Il4ra/Fas/Fcgr2b/Fgr/Tnfaip3	5
GO:0032872	BP	GO:0032872	regulation of stress-activated MAPK cascade	5/51	206/28891	3.15877e-05	0.000266138	9.76414e-05	Fas/Il1a/Fcgr2b/Il1b/Eif2ak2	5
GO:0032418	BP	GO:0032418	lysosome localization	4/51	102/28891	3.22106e-05	0.000269376	9.88294e-05	Il4ra/Fcer1g/Fgr/Syk	4
GO:1990849	BP	GO:1990849	vacuolar localization	4/51	102/28891	3.22106e-05	0.000269376	9.88294e-05	Il4ra/Fcer1g/Fgr/Syk	4
GO:0007259	BP	GO:0007259	receptor signaling pathway via JAK-STAT	5/51	208/28891	3.3079e-05	0.000275618	0.000101119	Csf2rb/Socs3/Bcl3/Lif/Il6	5
GO:0045921	BP	GO:0045921	positive regulation of exocytosis	4/51	103/28891	3.34685e-05	0.000277838	0.000101934	Il4ra/Fcer1g/Fgr/Syk	4
GO:0051048	BP	GO:0051048	negative regulation of secretion	5/51	210/28891	3.46245e-05	0.000285336	0.000104685	Il1b/Rsad2/Il1rn/Lif/Il6	5
GO:0070302	BP	GO:0070302	regulation of stress-activated protein kinase signaling cascade	5/51	210/28891	3.46245e-05	0.000285336	0.000104685	Fas/Il1a/Fcgr2b/Il1b/Eif2ak2	5
GO:0048525	BP	GO:0048525	negative regulation of viral process	4/51	105/28891	3.60919e-05	0.000296347	0.000108725	Ifih1/Trim30a/Eif2ak2/Rsad2	4
GO:0031334	BP	GO:0031334	positive regulation of protein-containing complex assembly	5/51	214/28891	3.78831e-05	0.000309928	0.000113707	Fas/Icam1/Gbp2/Csf3/Syk	5
GO:0002724	BP	GO:0002724	regulation of T cell cytokine production	3/51	37/28891	3.85939e-05	0.000313471	0.000115007	Il1b/Rsad2/Il6	3
GO:0050869	BP	GO:0050869	negative regulation of B cell activation	3/51	37/28891	3.85939e-05	0.000313471	0.000115007	Fas/Fcgr2b/Tnfaip3	3
GO:0097696	BP	GO:0097696	receptor signaling pathway via STAT	5/51	216/28891	3.95991e-05	0.000320483	0.00011758	Csf2rb/Socs3/Bcl3/Lif/Il6	5
GO:0052548	BP	GO:0052548	regulation of endopeptidase activity	6/51	360/28891	4.02993e-05	0.000323875	0.000118824	Fas/Serpina3f/Ccn1/Psmb8/Il6/Syk	6
GO:0002532	BP	GO:0002532	production of molecular mediator involved in inflammatory response	4/51	108/28891	4.03051e-05	0.000323875	0.000118824	Il4ra/Fcer1g/Il6/Syk	4
GO:0045577	BP	GO:0045577	regulation of B cell differentiation	3/51	38/28891	4.18498e-05	0.000333912	0.000122506	Fas/Il2rg/Syk	3
GO:2000191	BP	GO:2000191	regulation of fatty acid transport	3/51	38/28891	4.18498e-05	0.000333912	0.000122506	Il1a/Il1b/Syk	3
GO:0002434	BP	GO:0002434	immune complex clearance	2/51	6/28891	4.56201e-05	0.000361439	0.000132606	Fcgr2b/Ccl2	2
GO:0032765	BP	GO:0032765	positive regulation of mast cell cytokine production	2/51	6/28891	4.56201e-05	0.000361439	0.000132606	Fcer1g/Syk	2
GO:0045860	BP	GO:0045860	positive regulation of protein kinase activity	6/51	369/28891	4.62235e-05	0.000363668	0.000133423	Fgf2/Ccn1/Pik3r5/Il1b/Il1rn/Syk	6
GO:0051402	BP	GO:0051402	neuron apoptotic process	6/51	369/28891	4.62235e-05	0.000363668	0.000133423	Fas/Ccl3/Lcn2/Fcgr2b/Il1b/Il6	6
GO:0050866	BP	GO:0050866	negative regulation of cell activation	5/51	225/28891	4.808e-05	0.000376961	0.0001383	Il4ra/Fas/Fcgr2b/Fgr/Tnfaip3	5
GO:1905332	BP	GO:1905332	positive regulation of morphogenesis of an epithelium	3/51	40/28891	4.88915e-05	0.000381997	0.000140148	Fgf2/Lcn2/Lif	3
GO:0051235	BP	GO:0051235	maintenance of location	6/51	373/28891	4.90712e-05	0.000382079	0.000140178	Msr1/Cxcl10/Nfkbia/Fgf2/Il1b/Ikbke	6
GO:0141085	NA	GO:0141085	GO:0141085	3/51	41/28891	5.26857e-05	0.000408812	0.000149986	Gbp2/Trim30a/Eif2ak2	3
GO:0032652	BP	GO:0032652	regulation of interleukin-1 production	4/51	116/28891	5.32947e-05	0.000410715	0.000150684	Ccl3/Ccn1/Tnfaip3/Il6	4
GO:0045639	BP	GO:0045639	positive regulation of myeloid cell differentiation	4/51	116/28891	5.32947e-05	0.000410715	0.000150684	Ccl3/Lif/Csf3/Fos	4
GO:0002275	BP	GO:0002275	myeloid cell activation involved in immune response	4/51	119/28891	5.88743e-05	0.000452171	0.000165894	Il4ra/Fcer1g/Fgr/Syk	4
GO:0002883	BP	GO:0002883	regulation of hypersensitivity	3/51	43/28891	6.08423e-05	0.000465701	0.000170858	Fcer1g/Fcgr2b/H2-Q4	3
GO:0002576	BP	GO:0002576	platelet degranulation	2/51	7/28891	6.3796e-05	0.000478576	0.000175581	Fcer1g/Syk	2
GO:0033091	BP	GO:0033091	positive regulation of immature T cell proliferation	2/51	7/28891	6.3796e-05	0.000478576	0.000175581	Il1a/Il1b	2
GO:0033092	BP	GO:0033092	positive regulation of immature T cell proliferation in thymus	2/51	7/28891	6.3796e-05	0.000478576	0.000175581	Il1a/Il1b	2
GO:0045630	BP	GO:0045630	positive regulation of T-helper 2 cell differentiation	2/51	7/28891	6.3796e-05	0.000478576	0.000175581	Il4ra/Il6	2
GO:1901509	BP	GO:1901509	regulation of endothelial tube morphogenesis	2/51	7/28891	6.3796e-05	0.000478576	0.000175581	Cxcl10/Lcn2	2
GO:2000659	BP	GO:2000659	regulation of interleukin-1-mediated signaling pathway	2/51	7/28891	6.3796e-05	0.000478576	0.000175581	Il1rn/Il6	2
GO:0002709	BP	GO:0002709	regulation of T cell mediated immunity	4/51	122/28891	6.48687e-05	0.000483411	0.000177355	H2-Q4/Il1b/Rsad2/Il6	4
GO:0071346	BP	GO:0071346	cellular response to type II interferon	4/51	122/28891	6.48687e-05	0.000483411	0.000177355	Ccl3/Gbp2/Ccl2/Ccl4	4
GO:0010543	BP	GO:0010543	regulation of platelet activation	3/51	44/28891	6.5213e-05	0.000484378	0.00017771	Fcer1g/Il6/Syk	3
GO:0043550	BP	GO:0043550	regulation of lipid kinase activity	3/51	45/28891	6.97842e-05	0.000514943	0.000188924	Fgf2/Pik3r5/Fgr	3
GO:2000516	BP	GO:2000516	positive regulation of CD4-positive, alpha-beta T cell activation	3/51	45/28891	6.97842e-05	0.000514943	0.000188924	Il4ra/Il2rg/Il6	3
GO:0048872	BP	GO:0048872	homeostasis of number of cells	6/51	401/28891	7.31845e-05	0.000538276	0.000197484	Fas/Fcer1g/Fcgr2b/Ccl2/Tnfaip3/Il6	6
GO:0002524	BP	GO:0002524	hypersensitivity	3/51	46/28891	7.456e-05	0.000544843	0.000199894	Fcer1g/Fcgr2b/H2-Q4	3
GO:0033028	BP	GO:0033028	myeloid cell apoptotic process	3/51	46/28891	7.456e-05	0.000544843	0.000199894	Fcer1g/Fcgr2b/Il6	3
GO:0032649	BP	GO:0032649	regulation of type II interferon production	4/51	127/28891	7.58313e-05	0.000552345	0.000202646	Cd14/Tnfsf9/Bcl3/Il1b	4
GO:0051403	BP	GO:0051403	stress-activated MAPK cascade	5/51	248/28891	7.61886e-05	0.000553164	0.000202946	Fas/Il1a/Fcgr2b/Il1b/Eif2ak2	5
GO:0002685	BP	GO:0002685	regulation of leukocyte migration	5/51	249/28891	7.76469e-05	0.000561945	0.000206168	Icam1/Cxcl10/Il1a/Il1b/Ccl2	5
GO:0038061	BP	GO:0038061	NIK/NF-kappaB signaling	4/51	128/28891	7.81759e-05	0.000563965	0.000206909	Nfkbia/Relb/Il1b/Eif2ak2	4
GO:0019058	BP	GO:0019058	viral life cycle	5/51	250/28891	7.91267e-05	0.000569006	0.000208759	Icam1/Ifih1/Trim30a/Eif2ak2/Rsad2	5
GO:0141084	NA	GO:0141084	GO:0141084	3/51	47/28891	7.95447e-05	0.000570196	0.000209195	Gbp2/Trim30a/Eif2ak2	3
GO:0014050	BP	GO:0014050	negative regulation of glutamate secretion	2/51	8/28891	8.49651e-05	0.000603306	0.000221342	Il1b/Il1rn	2
GO:0070427	BP	GO:0070427	nucleotide-binding oligomerization domain containing 1 signaling pathway	2/51	8/28891	8.49651e-05	0.000603306	0.000221342	Nfkbia/Tnfaip3	2
GO:0097368	BP	GO:0097368	establishment of Sertoli cell barrier	2/51	8/28891	8.49651e-05	0.000603306	0.000221342	Icam1/Il1a	2
GO:0072593	BP	GO:0072593	reactive oxygen species metabolic process	5/51	257/28891	9.01032e-05	0.000636168	0.000233399	Trim30a/Ccn1/Lcn2/Cybb/Syk	5
GO:0002369	BP	GO:0002369	T cell cytokine production	3/51	49/28891	9.01566e-05	0.000636168	0.000233399	Il1b/Rsad2/Il6	3
GO:0002864	BP	GO:0002864	regulation of acute inflammatory response to antigenic stimulus	3/51	50/28891	9.57921e-05	0.000673827	0.000247215	Fcer1g/Fcgr2b/H2-Q4	3
GO:0031098	BP	GO:0031098	stress-activated protein kinase signaling cascade	5/51	261/28891	9.68809e-05	0.00067937	0.000249249	Fas/Il1a/Fcgr2b/Il1b/Eif2ak2	5
GO:0045429	BP	GO:0045429	positive regulation of nitric oxide biosynthetic process	3/51	51/28891	0.000101653	0.000710624	0.000260716	Icam1/Il1b/Il6	3
GO:0046425	BP	GO:0046425	regulation of receptor signaling pathway via JAK-STAT	4/51	138/28891	0.00010462	0.00072911	0.000267498	Socs3/Bcl3/Lif/Il6	4
GO:0032874	BP	GO:0032874	positive regulation of stress-activated MAPK cascade	4/51	139/28891	0.00010758	0.000743981	0.000272954	Il1a/Fcgr2b/Il1b/Eif2ak2	4
GO:0032309	BP	GO:0032309	icosanoid secretion	3/51	52/28891	0.000107742	0.000743981	0.000272954	Il1a/Il1b/Syk	3
GO:0032753	BP	GO:0032753	positive regulation of interleukin-4 production	3/51	52/28891	0.000107742	0.000743981	0.000272954	Fcer1g/H2-Q4/Syk	3
GO:0001810	BP	GO:0001810	regulation of type I hypersensitivity	2/51	9/28891	0.000109117	0.000746628	0.000273925	Fcer1g/Fcgr2b	2
GO:0032763	BP	GO:0032763	regulation of mast cell cytokine production	2/51	9/28891	0.000109117	0.000746628	0.000273925	Fcer1g/Syk	2
GO:2000553	BP	GO:2000553	positive regulation of T-helper 2 cell cytokine production	2/51	9/28891	0.000109117	0.000746628	0.000273925	Rsad2/Il6	2
GO:0032609	BP	GO:0032609	type II interferon production	4/51	141/28891	0.000113682	0.000771132	0.000282915	Cd14/Tnfsf9/Bcl3/Il1b	4
GO:0070304	BP	GO:0070304	positive regulation of stress-activated protein kinase signaling cascade	4/51	141/28891	0.000113682	0.000771132	0.000282915	Il1a/Fcgr2b/Il1b/Eif2ak2	4
GO:0002478	BP	GO:0002478	antigen processing and presentation of exogenous peptide antigen	3/51	53/28891	0.000114065	0.000771132	0.000282915	Fcer1g/Fcgr2b/H2-Q4	3
GO:1904407	BP	GO:1904407	positive regulation of nitric oxide metabolic process	3/51	53/28891	0.000114065	0.000771132	0.000282915	Icam1/Il1b/Il6	3
GO:0008360	BP	GO:0008360	regulation of cell shape	4/51	142/28891	0.000116825	0.000787438	0.000288897	Icam1/Ccl3/Fgr/Il6	4
GO:0006898	BP	GO:0006898	receptor-mediated endocytosis	5/51	272/28891	0.000117553	0.000789985	0.000289832	Msr1/Fcer1g/Cd14/Fcgr2b/Syk	5
GO:0014013	BP	GO:0014013	regulation of gliogenesis	4/51	143/28891	0.000120031	0.000804246	0.000295064	Fas/Il1b/Lif/Il6	4
GO:0034614	BP	GO:0034614	cellular response to reactive oxygen species	4/51	145/28891	0.000126634	0.000845977	0.000310374	Lcn2/Tnfaip3/Il6/Fos	4
GO:0043370	BP	GO:0043370	regulation of CD4-positive, alpha-beta T cell differentiation	3/51	55/28891	0.000127425	0.000848748	0.000311391	Il4ra/Il2rg/Il6	3
GO:1904892	BP	GO:1904892	regulation of receptor signaling pathway via STAT	4/51	146/28891	0.000130033	0.00086357	0.000316829	Socs3/Bcl3/Lif/Il6	4
GO:0043507	BP	GO:0043507	positive regulation of JUN kinase activity	3/51	56/28891	0.00013447	0.00088523	0.000324776	Il1b/Il1rn/Syk	3
GO:0045071	BP	GO:0045071	negative regulation of viral genome replication	3/51	56/28891	0.00013447	0.00088523	0.000324776	Ifih1/Eif2ak2/Rsad2	3
GO:0060251	BP	GO:0060251	regulation of glial cell proliferation	3/51	56/28891	0.00013447	0.00088523	0.000324776	Fas/Il1b/Il6	3
GO:0002315	BP	GO:0002315	marginal zone B cell differentiation	2/51	10/28891	0.000136243	0.000889121	0.000326203	Bcl3/Tnfaip3	2
GO:0016068	BP	GO:0016068	type I hypersensitivity	2/51	10/28891	0.000136243	0.000889121	0.000326203	Fcer1g/Fcgr2b	2
GO:0032762	BP	GO:0032762	mast cell cytokine production	2/51	10/28891	0.000136243	0.000889121	0.000326203	Fcer1g/Syk	2
GO:0010883	BP	GO:0010883	regulation of lipid storage	3/51	57/28891	0.000141765	0.00091984	0.000337473	Msr1/Nfkbia/Ikbke	3
GO:0034113	BP	GO:0034113	heterotypic cell-cell adhesion	3/51	57/28891	0.000141765	0.00091984	0.000337473	Il1b/Il1rn/Tnfaip3	3
GO:0034341	BP	GO:0034341	response to type II interferon	4/51	150/28891	0.00014429	0.000933543	0.000342501	Ccl3/Gbp2/Ccl2/Ccl4	4
GO:0001906	BP	GO:0001906	cell killing	5/51	286/28891	0.000148579	0.000956105	0.000350778	Cxcl10/Gbp2/H2-Q4/Ccl2/Syk	5
GO:0032731	BP	GO:0032731	positive regulation of interleukin-1 beta production	3/51	58/28891	0.000149311	0.000956105	0.000350778	Ccl3/Ccn1/Il6	3
GO:0045058	BP	GO:0045058	T cell selection	3/51	58/28891	0.000149311	0.000956105	0.000350778	Fas/Il6/Syk	3
GO:0052547	BP	GO:0052547	regulation of peptidase activity	6/51	457/28891	0.000149471	0.000956105	0.000350778	Fas/Serpina3f/Ccn1/Psmb8/Il6/Syk	6
GO:0038187	MF	GO:0038187	pattern recognition receptor activity	3/51	40/28407	5.13931e-05	0.000981141	0.000457374	Cd14/Ifih1/Trim30a	3
GO:0043235	CC	GO:0043235	receptor complex	7/51	417/28573	8.92557e-06	0.000990739	0.000488558	Il4ra/Csf2rb/Il2rg/Cd14/Il13ra1/Il6/Syk	7
GO:0032673	BP	GO:0032673	regulation of interleukin-4 production	3/51	59/28891	0.000157115	0.00100216	0.000367676	Fcer1g/H2-Q4/Syk	3
GO:0019884	BP	GO:0019884	antigen processing and presentation of exogenous antigen	3/51	60/28891	0.000165179	0.00105063	0.000385457	Fcer1g/Fcgr2b/H2-Q4	3
GO:0034115	BP	GO:0034115	negative regulation of heterotypic cell-cell adhesion	2/51	11/28891	0.000166331	0.00105203	0.000385972	Il1rn/Tnfaip3	2
GO:0070587	BP	GO:0070587	regulation of cell-cell adhesion involved in gastrulation	2/51	11/28891	0.000166331	0.00105203	0.000385972	Il1rn/Tnfaip3	2
GO:0051092	BP	GO:0051092	positive regulation of NF-kappaB transcription factor activity	4/51	156/28891	0.000167752	0.00105511	0.000387101	Icam1/Trim30a/Il1b/Eif2ak2	4
GO:1903900	BP	GO:1903900	regulation of viral life cycle	4/51	156/28891	0.000167752	0.00105511	0.000387101	Ifih1/Trim30a/Eif2ak2/Rsad2	4
GO:0042056	MF	GO:0042056	chemoattractant activity	3/51	43/28407	6.39513e-05	0.00106586	0.000496869	Cxcl10/Ccl3/Fgf2	3
GO:0031726	MF	GO:0031726	CCR1 chemokine receptor binding	2/51	7/28407	6.59821e-05	0.00106586	0.000496869	Ccl3/Ccl4	2
GO:0004715	MF	GO:0004715	non-membrane spanning protein tyrosine kinase activity	3/51	45/28407	7.3347e-05	0.00110019	0.000512871	Eif2ak2/Fgr/Syk	3
GO:0019864	MF	GO:0019864	IgG binding	2/51	8/28407	8.7875e-05	0.00110019	0.000512871	Fcer1g/Fcgr2b	2
GO:0031730	MF	GO:0031730	CCR5 chemokine receptor binding	2/51	8/28407	8.7875e-05	0.00110019	0.000512871	Ccl3/Ccl4	2
GO:0001784	MF	GO:0001784	phosphotyrosine residue binding	3/51	48/28407	8.9063e-05	0.00110019	0.000512871	Socs3/Fgr/Syk	3
GO:0032368	BP	GO:0032368	regulation of lipid transport	4/51	158/28891	0.000176151	0.00110486	0.000405354	Nfkbia/Il1a/Il1b/Syk	4
GO:0070301	BP	GO:0070301	cellular response to hydrogen peroxide	3/51	62/28891	0.000182102	0.00113902	0.000417888	Lcn2/Tnfaip3/Il6	3
GO:1903305	BP	GO:1903305	regulation of regulated secretory pathway	4/51	161/28891	0.000189314	0.00118086	0.000433237	Il4ra/Fcer1g/Fgr/Syk	4
GO:0001781	BP	GO:0001781	neutrophil apoptotic process	2/51	12/28891	0.000199371	0.00123337	0.000452503	Fcgr2b/Il6	2
GO:0070586	BP	GO:0070586	cell-cell adhesion involved in gastrulation	2/51	12/28891	0.000199371	0.00123337	0.000452503	Il1rn/Tnfaip3	2
GO:2000551	BP	GO:2000551	regulation of T-helper 2 cell cytokine production	2/51	12/28891	0.000199371	0.00123337	0.000452503	Rsad2/Il6	2
GO:0001503	BP	GO:0001503	ossification	6/51	484/28891	0.000203828	0.0012575	0.000461353	Fgf2/Ccn1/Stc1/Rsad2/Fgr/Il6	6
GO:0032102	BP	GO:0032102	negative regulation of response to external stimulus	6/51	485/28891	0.000206106	0.00126808	0.000465237	Socs3/Fgf2/Trim30a/Fcgr2b/H2-Q4/Tnfaip3	6
GO:0050921	BP	GO:0050921	positive regulation of chemotaxis	4/51	165/28891	0.000207951	0.00127596	0.000468127	Cxcl10/Fgf2/Il1b/Ccl2	4
GO:0006911	BP	GO:0006911	phagocytosis, engulfment	3/51	65/28891	0.000209535	0.00127873	0.000469145	Msr1/Fcer1g/Fcgr2b	3
GO:0060760	BP	GO:0060760	positive regulation of response to cytokine stimulus	3/51	65/28891	0.000209535	0.00127873	0.000469145	Ifih1/Ikbke/Irf7	3
GO:0019763	MF	GO:0019763	immunoglobulin receptor activity	2/51	9/28407	0.000112852	0.00131661	0.000613758	Fcer1g/Fcgr2b	2
GO:0060337	BP	GO:0060337	type I interferon-mediated signaling pathway	3/51	66/28891	0.000219241	0.0013272	0.000486927	Ifih1/Ikbke/Irf7	3
GO:0071357	BP	GO:0071357	cellular response to type I interferon	3/51	66/28891	0.000219241	0.0013272	0.000486927	Ifih1/Ikbke/Irf7	3
GO:0071715	BP	GO:0071715	icosanoid transport	3/51	66/28891	0.000219241	0.0013272	0.000486927	Il1a/Il1b/Syk	3
GO:0002861	BP	GO:0002861	regulation of inflammatory response to antigenic stimulus	3/51	67/28891	0.000229233	0.00137662	0.000505056	Fcer1g/Fcgr2b/H2-Q4	3
GO:0032633	BP	GO:0032633	interleukin-4 production	3/51	67/28891	0.000229233	0.00137662	0.000505056	Fcer1g/H2-Q4/Syk	3
GO:0140895	BP	GO:0140895	cell surface toll-like receptor signaling pathway	3/51	67/28891	0.000229233	0.00137662	0.000505056	Nfkbia/Cd14/Tnfaip3	3
GO:0002698	BP	GO:0002698	negative regulation of immune effector process	4/51	170/28891	0.000233064	0.00139591	0.000512136	Il4ra/Fcgr2b/H2-Q4/Tnfaip3	4
GO:0032725	BP	GO:0032725	positive regulation of granulocyte macrophage colony-stimulating factor production	2/51	13/28891	0.000235355	0.0014059	0.000515801	Il1b/Syk	2
GO:0032663	BP	GO:0032663	regulation of interleukin-2 production	3/51	68/28891	0.000239515	0.00142322	0.000522156	Il1a/Il1b/Tnfaip3	3
GO:0032720	BP	GO:0032720	negative regulation of tumor necrosis factor production	3/51	68/28891	0.000239515	0.00142322	0.000522156	Trim30a/Bcl3/Tnfaip3	3
GO:0030856	BP	GO:0030856	regulation of epithelial cell differentiation	4/51	173/28891	0.00024914	0.00146677	0.000538132	Il1a/Fgf2/Il1b/Lif	4
GO:0061082	BP	GO:0061082	myeloid leukocyte cytokine production	3/51	69/28891	0.000250091	0.00146677	0.000538132	Fcer1g/Il1b/Syk	3
GO:0062208	BP	GO:0062208	positive regulation of pattern recognition receptor signaling pathway	3/51	69/28891	0.000250091	0.00146677	0.000538132	Cd14/Gbp2/Rsad2	3
GO:0072678	BP	GO:0072678	T cell migration	3/51	69/28891	0.000250091	0.00146677	0.000538132	Icam1/Cxcl10/Ccl2	3
GO:1903556	BP	GO:1903556	negative regulation of tumor necrosis factor superfamily cytokine production	3/51	69/28891	0.000250091	0.00146677	0.000538132	Trim30a/Bcl3/Tnfaip3	3
GO:0002752	BP	GO:0002752	cell surface pattern recognition receptor signaling pathway	3/51	70/28891	0.000260965	0.00152263	0.000558627	Nfkbia/Cd14/Tnfaip3	3
GO:0032732	BP	GO:0032732	positive regulation of interleukin-1 production	3/51	70/28891	0.000260965	0.00152263	0.000558627	Ccl3/Ccn1/Il6	3
GO:0001885	BP	GO:0001885	endothelial cell development	3/51	71/28891	0.00027214	0.00157562	0.000578067	Icam1/Stc1/Il1b	3
GO:0008347	BP	GO:0008347	glial cell migration	3/51	71/28891	0.00027214	0.00157562	0.000578067	Fas/Ccl3/Ccl2	3
GO:0042509	BP	GO:0042509	regulation of tyrosine phosphorylation of STAT protein	3/51	71/28891	0.00027214	0.00157562	0.000578067	Socs3/Lif/Il6	3
GO:0045628	BP	GO:0045628	regulation of T-helper 2 cell differentiation	2/51	14/28891	0.00027427	0.00157985	0.000579621	Il4ra/Il6	2
GO:0072683	BP	GO:0072683	T cell extravasation	2/51	14/28891	0.00027427	0.00157985	0.000579621	Icam1/Ccl2	2
GO:0032608	BP	GO:0032608	interferon-beta production	3/51	72/28891	0.000283619	0.00162375	0.000595726	Ifih1/Relb/Irf7	3
GO:0032648	BP	GO:0032648	regulation of interferon-beta production	3/51	72/28891	0.000283619	0.00162375	0.000595726	Ifih1/Relb/Irf7	3
GO:0016032	BP	GO:0016032	viral process	5/51	329/28891	0.000284048	0.00162375	0.000595726	Icam1/Ifih1/Trim30a/Eif2ak2/Rsad2	5
GO:0031348	BP	GO:0031348	negative regulation of defense response	5/51	330/28891	0.000288037	0.00164239	0.000602565	Socs3/Trim30a/Fcgr2b/H2-Q4/Tnfaip3	5
GO:0008083	MF	GO:0008083	growth factor activity	4/51	149/28407	0.000149975	0.00165762	0.000772723	Fgf2/Lif/Csf3/Il6	4
GO:0018105	BP	GO:0018105	peptidyl-serine phosphorylation	5/51	331/28891	0.000292068	0.00166118	0.000609459	Lif/Ikbke/Csf3/Il6/Syk	5
GO:0034340	BP	GO:0034340	response to type I interferon	3/51	73/28891	0.000295407	0.00167595	0.000614878	Ifih1/Ikbke/Irf7	3
GO:0006606	BP	GO:0006606	protein import into nucleus	4/51	182/28891	0.000302157	0.00170143	0.000624223	Nfkbia/Bcl3/Il6/Syk	4
GO:0045766	BP	GO:0045766	positive regulation of angiogenesis	4/51	182/28891	0.000302157	0.00170143	0.000624223	Il1a/Fgf2/Il1b/Cybb	4
GO:1904018	BP	GO:1904018	positive regulation of vasculature development	4/51	182/28891	0.000302157	0.00170143	0.000624223	Il1a/Fgf2/Il1b/Cybb	4
GO:0043506	BP	GO:0043506	regulation of JUN kinase activity	3/51	74/28891	0.000307507	0.00171869	0.000630558	Il1b/Il1rn/Syk	3
GO:0045428	BP	GO:0045428	regulation of nitric oxide biosynthetic process	3/51	74/28891	0.000307507	0.00171869	0.000630558	Icam1/Il1b/Il6	3
GO:0099024	BP	GO:0099024	plasma membrane invagination	3/51	74/28891	0.000307507	0.00171869	0.000630558	Msr1/Fcer1g/Fcgr2b	3
GO:0032308	BP	GO:0032308	positive regulation of prostaglandin secretion	2/51	15/28891	0.000316108	0.00175374	0.000643417	Il1a/Il1b	2
GO:0044406	BP	GO:0044406	adhesion of symbiont to host	2/51	15/28891	0.000316108	0.00175374	0.000643417	Icam1/Gbp2	2
GO:0048711	BP	GO:0048711	positive regulation of astrocyte differentiation	2/51	15/28891	0.000316108	0.00175374	0.000643417	Il1b/Lif	2
GO:0006959	BP	GO:0006959	humoral immune response	5/51	337/28891	0.000317162	0.00175527	0.000643979	Cxcl10/Bcl3/Fcgr2b/H2-Q4/Il1b	5
GO:0002763	BP	GO:0002763	positive regulation of myeloid leukocyte differentiation	3/51	75/28891	0.000319922	0.00176191	0.000646415	Ccl3/Lif/Fos	3
GO:0007260	BP	GO:0007260	tyrosine phosphorylation of STAT protein	3/51	75/28891	0.000319922	0.00176191	0.000646415	Socs3/Lif/Il6	3
GO:0050792	BP	GO:0050792	regulation of viral process	4/51	187/28891	0.000334879	0.00183533	0.000673351	Ifih1/Trim30a/Eif2ak2/Rsad2	4
GO:0051170	BP	GO:0051170	import into nucleus	4/51	187/28891	0.000334879	0.00183533	0.000673351	Nfkbia/Bcl3/Il6/Syk	4
GO:0018209	BP	GO:0018209	peptidyl-serine modification	5/51	343/28891	0.00034386	0.00187999	0.000689736	Lif/Ikbke/Csf3/Il6/Syk	5
GO:0045669	BP	GO:0045669	positive regulation of osteoblast differentiation	3/51	77/28891	0.000345713	0.00188101	0.00069011	Fgf2/Ccn1/Il6	3
GO:0080164	BP	GO:0080164	regulation of nitric oxide metabolic process	3/51	77/28891	0.000345713	0.00188101	0.00069011	Icam1/Il1b/Il6	3
GO:0009410	BP	GO:0009410	response to xenobiotic stimulus	5/51	346/28891	0.000357832	0.00194227	0.000712585	Lcn2/Il1b/Cybb/Ccl4/Fos	5
GO:0002467	BP	GO:0002467	germinal center formation	2/51	16/28891	0.000360859	0.00194933	0.000715175	Bcl3/Tnfaip3	2
GO:0032645	BP	GO:0032645	regulation of granulocyte macrophage colony-stimulating factor production	2/51	16/28891	0.000360859	0.00194933	0.000715175	Il1b/Syk	2
GO:0014009	BP	GO:0014009	glial cell proliferation	3/51	79/28891	0.000372807	0.00200906	0.000737091	Fas/Il1b/Il6	3
GO:0051897	BP	GO:0051897	positive regulation of protein kinase B signaling	4/51	193/28891	0.000377409	0.00202902	0.000744414	Fgf2/Fgr/Csf3/Il6	4
GO:2000514	BP	GO:2000514	regulation of CD4-positive, alpha-beta T cell activation	3/51	80/28891	0.000386851	0.00207485	0.000761225	Il4ra/Il2rg/Il6	3
GO:0000302	BP	GO:0000302	response to reactive oxygen species	4/51	195/28891	0.000392407	0.00209965	0.000770327	Lcn2/Tnfaip3/Il6/Fos	4
GO:0032306	BP	GO:0032306	regulation of prostaglandin secretion	2/51	17/28891	0.000408512	0.00218066	0.000800047	Il1a/Il1b	2
GO:0045309	MF	GO:0045309	protein phosphorylated amino acid binding	3/51	64/28407	0.000210245	0.00219774	0.00102451	Socs3/Fgr/Syk	3
GO:0050839	MF	GO:0050839	cell adhesion molecule binding	5/51	306/28407	0.000219774	0.00219774	0.00102451	Icam1/Fgf2/Ccn1/Il1b/Syk	5
GO:0008625	BP	GO:0008625	extrinsic apoptotic signaling pathway via death domain receptors	3/51	82/28891	0.000415952	0.00220474	0.00080888	Fas/Icam1/Tnfaip3	3
GO:0010324	BP	GO:0010324	membrane invagination	3/51	82/28891	0.000415952	0.00220474	0.00080888	Msr1/Fcer1g/Fcgr2b	3
GO:0032088	BP	GO:0032088	negative regulation of NF-kappaB transcription factor activity	3/51	82/28891	0.000415952	0.00220474	0.00080888	Nfkbia/Bcl3/Tnfaip3	3
GO:0048002	BP	GO:0048002	antigen processing and presentation of peptide antigen	3/51	83/28891	0.000431014	0.00227923	0.000836209	Fcer1g/Fcgr2b/H2-Q4	3
GO:0046942	BP	GO:0046942	carboxylic acid transport	5/51	362/28891	0.000439752	0.00232	0.000851168	Il1a/Il1b/Il1rn/Nfkbie/Syk	5
GO:0002639	BP	GO:0002639	positive regulation of immunoglobulin production	3/51	84/28891	0.000446423	0.00234424	0.000860062	Il4ra/H2-Q4/Il6	3
GO:0140888	BP	GO:0140888	interferon-mediated signaling pathway	3/51	84/28891	0.000446423	0.00234424	0.000860062	Ifih1/Ikbke/Irf7	3
GO:0015849	BP	GO:0015849	organic acid transport	5/51	364/28891	0.00045091	0.00236231	0.00086669	Il1a/Il1b/Il1rn/Nfkbie/Syk	5
GO:0032604	BP	GO:0032604	granulocyte macrophage colony-stimulating factor production	2/51	18/28891	0.000459057	0.00238837	0.00087625	Il1b/Syk	2
GO:0035745	BP	GO:0035745	T-helper 2 cell cytokine production	2/51	18/28891	0.000459057	0.00238837	0.00087625	Rsad2/Il6	2
GO:0045837	BP	GO:0045837	negative regulation of membrane potential	2/51	18/28891	0.000459057	0.00238837	0.00087625	Il1rn/Il6	2
GO:2000107	BP	GO:2000107	negative regulation of leukocyte apoptotic process	3/51	86/28891	0.000478293	0.00248273	0.000910869	Fcer1g/Bcl3/Fcgr2b	3
GO:0006809	BP	GO:0006809	nitric oxide biosynthetic process	3/51	87/28891	0.000494761	0.00256232	0.000940069	Icam1/Il1b/Il6	3
GO:0001820	BP	GO:0001820	serotonin secretion	2/51	19/28891	0.000512485	0.00262401	0.000962705	Fcer1g/Syk	2
GO:0003159	BP	GO:0003159	morphogenesis of an endothelium	2/51	19/28891	0.000512485	0.00262401	0.000962705	Cxcl10/Lcn2	2
GO:0045579	BP	GO:0045579	positive regulation of B cell differentiation	2/51	19/28891	0.000512485	0.00262401	0.000962705	Il2rg/Syk	2
GO:0061154	BP	GO:0061154	endothelial tube morphogenesis	2/51	19/28891	0.000512485	0.00262401	0.000962705	Cxcl10/Lcn2	2
GO:0070431	BP	GO:0070431	nucleotide-binding oligomerization domain containing 2 signaling pathway	2/51	19/28891	0.000512485	0.00262401	0.000962705	Nfkbia/Tnfaip3	2
GO:0043281	BP	GO:0043281	regulation of cysteine-type endopeptidase activity involved in apoptotic process	4/51	212/28891	0.000537604	0.0027464	0.00100761	Fas/Ccn1/Il6/Syk	4
GO:0033627	BP	GO:0033627	cell adhesion mediated by integrin	3/51	90/28891	0.000546332	0.00278469	0.00102166	Icam1/Lif/Syk	3
GO:0008201	MF	GO:0008201	heparin binding	4/51	179/28407	0.000302326	0.00280002	0.00130527	Cxcl10/Fgf2/Ccn1/Ccl2	4
GO:0005149	MF	GO:0005149	interleukin-1 receptor binding	2/51	15/28407	0.00032689	0.00280002	0.00130527	Il1b/Il1rn	2
GO:0046935	MF	GO:0046935	1-phosphatidylinositol-3-kinase regulator activity	2/51	15/28407	0.00032689	0.00280002	0.00130527	Socs3/Pik3r5	2
GO:0001664	MF	GO:0001664	G protein-coupled receptor binding	5/51	335/28407	0.000333336	0.00280002	0.00130527	Cxcl10/Ccl3/Ccl2/Ccrl2/Ccl4	5
GO:0002262	BP	GO:0002262	myeloid cell homeostasis	4/51	215/28891	0.000566707	0.00287556	0.00105499	Fcer1g/Fcgr2b/Ccl2/Il6	4
GO:0048771	BP	GO:0048771	tissue remodeling	4/51	215/28891	0.000566707	0.00287556	0.00105499	Il1a/Lif/Il6/Syk	4
GO:0051956	BP	GO:0051956	negative regulation of amino acid transport	2/51	20/28891	0.000568785	0.00287963	0.00105649	Il1b/Il1rn	2
GO:0042542	BP	GO:0042542	response to hydrogen peroxide	3/51	92/28891	0.000582553	0.00292963	0.00107483	Lcn2/Tnfaip3/Il6	3
GO:0045069	BP	GO:0045069	regulation of viral genome replication	3/51	92/28891	0.000582553	0.00292963	0.00107483	Ifih1/Eif2ak2/Rsad2	3
GO:0046209	BP	GO:0046209	nitric oxide metabolic process	3/51	92/28891	0.000582553	0.00292963	0.00107483	Icam1/Il1b/Il6	3
GO:0043122	BP	GO:0043122	regulation of I-kappaB kinase/NF-kappaB signaling	4/51	217/28891	0.000586722	0.00294404	0.00108012	Il1a/Trim30a/Il1b/Tnfaip3	4
GO:0014015	BP	GO:0014015	positive regulation of gliogenesis	3/51	93/28891	0.000601226	0.00301013	0.00110436	Il1b/Lif/Il6	3
GO:0050871	BP	GO:0050871	positive regulation of B cell activation	3/51	94/28891	0.000620276	0.00306906	0.00112598	Il2rg/Il6/Syk	3
GO:2001057	BP	GO:2001057	reactive nitrogen species metabolic process	3/51	94/28891	0.000620276	0.00306906	0.00112598	Icam1/Il1b/Il6	3
GO:0019886	BP	GO:0019886	antigen processing and presentation of exogenous peptide antigen via MHC class II	2/51	21/28891	0.000627947	0.00306906	0.00112598	Fcer1g/Fcgr2b	2
GO:0032305	BP	GO:0032305	positive regulation of icosanoid secretion	2/51	21/28891	0.000627947	0.00306906	0.00112598	Il1a/Il1b	2
GO:0032310	BP	GO:0032310	prostaglandin secretion	2/51	21/28891	0.000627947	0.00306906	0.00112598	Il1a/Il1b	2
GO:0032495	BP	GO:0032495	response to muramyl dipeptide	2/51	21/28891	0.000627947	0.00306906	0.00112598	Nfkbia/Tnfaip3	2
GO:0035234	BP	GO:0035234	ectopic germ cell programmed cell death	2/51	21/28891	0.000627947	0.00306906	0.00112598	Il1a/Il1b	2
GO:0035994	BP	GO:0035994	response to muscle stretch	2/51	21/28891	0.000627947	0.00306906	0.00112598	Nfkbia/Fos	2
GO:0045624	BP	GO:0045624	positive regulation of T-helper cell differentiation	2/51	21/28891	0.000627947	0.00306906	0.00112598	Il4ra/Il6	2
GO:0060340	BP	GO:0060340	positive regulation of type I interferon-mediated signaling pathway	2/51	21/28891	0.000627947	0.00306906	0.00112598	Ikbke/Irf7	2
GO:0071639	BP	GO:0071639	positive regulation of monocyte chemotactic protein-1 production	2/51	21/28891	0.000627947	0.00306906	0.00112598	Il1b/Syk	2
GO:0051781	BP	GO:0051781	positive regulation of cell division	3/51	95/28891	0.000639709	0.00311979	0.0011446	Il1a/Fgf2/Il1b	3
GO:0030168	BP	GO:0030168	platelet activation	3/51	96/28891	0.000659526	0.0032026	0.00117498	Fcer1g/Il6/Syk	3
GO:0051384	BP	GO:0051384	response to glucocorticoid	3/51	96/28891	0.000659526	0.0032026	0.00117498	Fas/Il1rn/Il6	3
GO:0019216	BP	GO:0019216	regulation of lipid metabolic process	5/51	398/28891	0.000675303	0.00327218	0.00120051	Il1a/Fgf2/Ccn1/Il1b/Fgr	5
GO:0017157	BP	GO:0017157	regulation of exocytosis	4/51	226/28891	0.000683046	0.00330261	0.00121167	Il4ra/Fcer1g/Fgr/Syk	4
GO:0002283	BP	GO:0002283	neutrophil activation involved in immune response	2/51	22/28891	0.000689963	0.00331476	0.00121613	Fcer1g/Syk	2
GO:0060009	BP	GO:0060009	Sertoli cell development	2/51	22/28891	0.000689963	0.00331476	0.00121613	Icam1/Il1a	2
GO:0070423	BP	GO:0070423	nucleotide-binding oligomerization domain containing signaling pathway	2/51	22/28891	0.000689963	0.00331476	0.00121613	Nfkbia/Tnfaip3	2
GO:0002312	BP	GO:0002312	B cell activation involved in immune response	3/51	98/28891	0.000700327	0.00335741	0.00123177	Bcl3/Tnfaip3/Il6	3
GO:0032970	BP	GO:0032970	regulation of actin filament-based process	5/51	402/28891	0.000706361	0.00337916	0.00123975	Icam1/Il1a/Stc1/Fgr/Csf3	5
GO:0046888	BP	GO:0046888	negative regulation of hormone secretion	3/51	99/28891	0.000721317	0.00344341	0.00126333	Il1b/Lif/Il6	3
GO:0002693	BP	GO:0002693	positive regulation of cellular extravasation	2/51	23/28891	0.000754821	0.00358818	0.00131644	Icam1/Ccl2	2
GO:0035872	BP	GO:0035872	nucleotide-binding domain, leucine rich repeat containing receptor signaling pathway	2/51	23/28891	0.000754821	0.00358818	0.00131644	Nfkbia/Tnfaip3	2
GO:0007229	BP	GO:0007229	integrin-mediated signaling pathway	3/51	101/28891	0.000764491	0.00361891	0.00132772	Fcer1g/Fgr/Syk	3
GO:0120162	BP	GO:0120162	positive regulation of cold-induced thermogenesis	3/51	101/28891	0.000764491	0.00361891	0.00132772	Il4ra/Lcn2/Syk	3
GO:0002712	BP	GO:0002712	regulation of B cell mediated immunity	3/51	102/28891	0.000786682	0.00369299	0.00135489	Fcer1g/Fcgr2b/H2-Q4	3
GO:0002889	BP	GO:0002889	regulation of immunoglobulin mediated immune response	3/51	102/28891	0.000786682	0.00369299	0.00135489	Fcer1g/Fcgr2b/H2-Q4	3
GO:0050688	BP	GO:0050688	regulation of defense response to virus	3/51	102/28891	0.000786682	0.00369299	0.00135489	Trim30a/Il1b/Tnfaip3	3
GO:2001237	BP	GO:2001237	negative regulation of extrinsic apoptotic signaling pathway	3/51	102/28891	0.000786682	0.00369299	0.00135489	Icam1/Il1b/Tnfaip3	3
GO:0050679	BP	GO:0050679	positive regulation of epithelial cell proliferation	4/51	235/28891	0.000790088	0.00370128	0.00135794	Fgf2/Ccl2/Tnfaip3/Il6	4
GO:0032370	BP	GO:0032370	positive regulation of lipid transport	3/51	103/28891	0.000809278	0.00378333	0.00138804	Nfkbia/Il1a/Il1b	3
GO:0033033	BP	GO:0033033	negative regulation of myeloid cell apoptotic process	2/51	24/28891	0.000822512	0.00381362	0.00139915	Fcer1g/Fcgr2b	2
GO:0033630	BP	GO:0033630	positive regulation of cell adhesion mediated by integrin	2/51	24/28891	0.000822512	0.00381362	0.00139915	Lif/Syk	2
GO:0043011	BP	GO:0043011	myeloid dendritic cell differentiation	2/51	24/28891	0.000822512	0.00381362	0.00139915	Tnfsf9/Relb	2
GO:0090330	BP	GO:0090330	regulation of platelet aggregation	2/51	24/28891	0.000822512	0.00381362	0.00139915	Il6/Syk	2
GO:0046330	BP	GO:0046330	positive regulation of JNK cascade	3/51	104/28891	0.000832283	0.00385102	0.00141287	Il1a/Fcgr2b/Il1b	3
GO:0050777	BP	GO:0050777	negative regulation of immune response	4/51	239/28891	0.000841269	0.00388463	0.0014252	Il4ra/Fcgr2b/H2-Q4/Tnfaip3	4
GO:2000116	BP	GO:2000116	regulation of cysteine-type endopeptidase activity	4/51	240/28891	0.000854422	0.00393732	0.00144453	Fas/Ccn1/Il6/Syk	4
GO:0002064	BP	GO:0002064	epithelial cell development	4/51	242/28891	0.000881162	0.00405227	0.00148671	Icam1/Il1a/Stc1/Il1b	4
GO:0002495	BP	GO:0002495	antigen processing and presentation of peptide antigen via MHC class II	2/51	25/28891	0.000893027	0.00406509	0.00149141	Fcer1g/Fcgr2b	2
GO:0010743	BP	GO:0010743	regulation of macrophage derived foam cell differentiation	2/51	25/28891	0.000893027	0.00406509	0.00149141	Msr1/Nfkbia	2
GO:0010884	BP	GO:0010884	positive regulation of lipid storage	2/51	25/28891	0.000893027	0.00406509	0.00149141	Msr1/Ikbke	2
GO:1901739	BP	GO:1901739	regulation of myoblast fusion	2/51	25/28891	0.000893027	0.00406509	0.00149141	Il4ra/Cxcl10	2
GO:0034599	BP	GO:0034599	cellular response to oxidative stress	4/51	243/28891	0.000894751	0.00406509	0.00149141	Lcn2/Tnfaip3/Il6/Fos	4
GO:0050920	BP	GO:0050920	regulation of chemotaxis	4/51	243/28891	0.000894751	0.00406509	0.00149141	Cxcl10/Fgf2/Il1b/Ccl2	4
GO:0016525	BP	GO:0016525	negative regulation of angiogenesis	3/51	109/28891	0.000953548	0.00432352	0.00158622	Cxcl10/Ccl2/Lif	3
GO:0014048	BP	GO:0014048	regulation of glutamate secretion	2/51	26/28891	0.000966354	0.00435535	0.0015979	Il1b/Il1rn	2
GO:0043552	BP	GO:0043552	positive regulation of phosphatidylinositol 3-kinase activity	2/51	26/28891	0.000966354	0.00435535	0.0015979	Fgf2/Fgr	2
GO:2000193	BP	GO:2000193	positive regulation of fatty acid transport	2/51	26/28891	0.000966354	0.00435535	0.0015979	Il1a/Il1b	2
GO:0031640	BP	GO:0031640	killing of cells of another organism	3/51	110/28891	0.000979069	0.00437922	0.00160666	Cxcl10/Gbp2/Syk	3
GO:0031960	BP	GO:0031960	response to corticosteroid	3/51	110/28891	0.000979069	0.00437922	0.00160666	Fas/Il1rn/Il6	3
GO:0141061	NA	GO:0141061	GO:0141061	3/51	110/28891	0.000979069	0.00437922	0.00160666	Cxcl10/Gbp2/Syk	3
GO:0001763	BP	GO:0001763	morphogenesis of a branching structure	4/51	249/28891	0.00097941	0.00437922	0.00160666	Socs3/Fgf2/Il1b/Il6	4
GO:0009306	BP	GO:0009306	protein secretion	5/51	434/28891	0.000994899	0.00443969	0.00162885	Il1a/Il1b/Rsad2/Il1rn/Il6	5
GO:0002690	BP	GO:0002690	positive regulation of leukocyte chemotaxis	3/51	111/28891	0.00100502	0.00445895	0.00163591	Cxcl10/Il1b/Ccl2	3
GO:2000181	BP	GO:2000181	negative regulation of blood vessel morphogenesis	3/51	111/28891	0.00100502	0.00445895	0.00163591	Cxcl10/Ccl2/Lif	3
GO:0035592	BP	GO:0035592	establishment of protein localization to extracellular region	5/51	435/28891	0.00100514	0.00445895	0.00163591	Il1a/Il1b/Rsad2/Il1rn/Il6	5
GO:0015711	BP	GO:0015711	organic anion transport	5/51	436/28891	0.00101546	0.00449589	0.00164946	Il1a/Il1b/Il1rn/Nfkbie/Syk	5
GO:2001233	BP	GO:2001233	regulation of apoptotic signaling pathway	5/51	437/28891	0.00102585	0.00453303	0.00166309	Fas/Icam1/Fcgr2b/Il1b/Tnfaip3	5
GO:1901343	BP	GO:1901343	negative regulation of vasculature development	3/51	112/28891	0.0010314	0.00454864	0.00166882	Cxcl10/Ccl2/Lif	3
GO:0043547	BP	GO:0043547	positive regulation of GTPase activity	4/51	253/28891	0.00103889	0.00455306	0.00167044	Icam1/Ccl3/Ccl2/Ccl4	4
GO:0002504	BP	GO:0002504	antigen processing and presentation of peptide or polysaccharide antigen via MHC class II	2/51	27/28891	0.00104249	0.00455306	0.00167044	Fcer1g/Fcgr2b	2
GO:0032740	BP	GO:0032740	positive regulation of interleukin-17 production	2/51	27/28891	0.00104249	0.00455306	0.00167044	Ccn1/Il6	2
GO:0046426	BP	GO:0046426	negative regulation of receptor signaling pathway via JAK-STAT	2/51	27/28891	0.00104249	0.00455306	0.00167044	Socs3/Bcl3	2
GO:1904996	BP	GO:1904996	positive regulation of leukocyte adhesion to vascular endothelial cell	2/51	27/28891	0.00104249	0.00455306	0.00167044	Icam1/Il6	2
GO:0015908	BP	GO:0015908	fatty acid transport	3/51	113/28891	0.00105822	0.00460396	0.00168911	Il1a/Il1b/Syk	3
GO:0031343	BP	GO:0031343	positive regulation of cell killing	3/51	113/28891	0.00105822	0.00460396	0.00168911	H2-Q4/Ccl2/Syk	3
GO:0071692	BP	GO:0071692	protein localization to extracellular region	5/51	441/28891	0.00106823	0.0046386	0.00170182	Il1a/Il1b/Rsad2/Il1rn/Il6	5
GO:0046889	BP	GO:0046889	positive regulation of lipid biosynthetic process	3/51	114/28891	0.00108547	0.00470441	0.00172597	Il1a/Ccn1/Il1b	3
GO:0006869	BP	GO:0006869	lipid transport	5/51	445/28891	0.0011119	0.00480483	0.00176281	Msr1/Nfkbia/Il1a/Il1b/Syk	5
GO:0002520	BP	GO:0002520	immune system development	4/51	258/28891	0.00111676	0.00480483	0.00176281	Fas/Bcl3/H2-Q4/Tnfaip3	4
GO:0032727	BP	GO:0032727	positive regulation of interferon-alpha production	2/51	28/28891	0.00112141	0.00480483	0.00176281	Ifih1/Irf7	2
GO:0045063	BP	GO:0045063	T-helper 1 cell differentiation	2/51	28/28891	0.00112141	0.00480483	0.00176281	Il4ra/Relb	2
GO:0060713	BP	GO:0060713	labyrinthine layer morphogenesis	2/51	28/28891	0.00112141	0.00480483	0.00176281	Socs3/Ccn1	2
GO:0090026	BP	GO:0090026	positive regulation of monocyte chemotaxis	2/51	28/28891	0.00112141	0.00480483	0.00176281	Cxcl10/Ccl2	2
GO:0072594	BP	GO:0072594	establishment of protein localization to organelle	5/51	452/28891	0.0011915	0.00509549	0.00186945	Nfkbia/Bcl3/Tnfaip3/Il6/Syk	5
GO:0001892	BP	GO:0001892	embryonic placenta development	3/51	118/28891	0.00119892	0.0050969	0.00186996	Socs3/Ccn1/Lif	3
GO:0045446	BP	GO:0045446	endothelial cell differentiation	3/51	118/28891	0.00119892	0.0050969	0.00186996	Icam1/Stc1/Il1b	3
GO:0031100	BP	GO:0031100	animal organ regeneration	2/51	29/28891	0.00120312	0.0050969	0.00186996	Lif/Il6	2
GO:0034121	BP	GO:0034121	regulation of toll-like receptor signaling pathway	2/51	29/28891	0.00120312	0.0050969	0.00186996	Trim30a/Irf7	2
GO:0060008	BP	GO:0060008	Sertoli cell differentiation	2/51	29/28891	0.00120312	0.0050969	0.00186996	Icam1/Il1a	2
GO:0051896	BP	GO:0051896	regulation of protein kinase B signaling	4/51	266/28891	0.00124974	0.0052845	0.00193879	Fgf2/Fgr/Csf3/Il6	4
GO:0045055	BP	GO:0045055	regulated exocytosis	4/51	267/28891	0.00126711	0.00534793	0.00196206	Il4ra/Fcer1g/Fgr/Syk	4
GO:0010742	BP	GO:0010742	macrophage derived foam cell differentiation	2/51	30/28891	0.00128761	0.00536423	0.00196804	Msr1/Nfkbia	2
GO:0015732	BP	GO:0015732	prostaglandin transport	2/51	30/28891	0.00128761	0.00536423	0.00196804	Il1a/Il1b	2
GO:0032891	BP	GO:0032891	negative regulation of organic acid transport	2/51	30/28891	0.00128761	0.00536423	0.00196804	Il1b/Il1rn	2
GO:0060252	BP	GO:0060252	positive regulation of glial cell proliferation	2/51	30/28891	0.00128761	0.00536423	0.00196804	Il1b/Il6	2
GO:0090218	BP	GO:0090218	positive regulation of lipid kinase activity	2/51	30/28891	0.00128761	0.00536423	0.00196804	Fgf2/Fgr	2
GO:1902042	BP	GO:1902042	negative regulation of extrinsic apoptotic signaling pathway via death domain receptors	2/51	30/28891	0.00128761	0.00536423	0.00196804	Icam1/Tnfaip3	2
GO:1904893	BP	GO:1904893	negative regulation of receptor signaling pathway via STAT	2/51	30/28891	0.00128761	0.00536423	0.00196804	Socs3/Bcl3	2
GO:0033688	BP	GO:0033688	regulation of osteoblast proliferation	2/51	31/28891	0.00137485	0.00569618	0.00208983	Ccn1/Eif2ak2	2
GO:0071605	BP	GO:0071605	monocyte chemotactic protein-1 production	2/51	31/28891	0.00137485	0.00569618	0.00208983	Il1b/Syk	2
GO:0071637	BP	GO:0071637	regulation of monocyte chemotactic protein-1 production	2/51	31/28891	0.00137485	0.00569618	0.00208983	Il1b/Syk	2
GO:2000106	BP	GO:2000106	regulation of leukocyte apoptotic process	3/51	124/28891	0.00138269	0.00571816	0.00209789	Fcer1g/Bcl3/Fcgr2b	3
GO:0019079	BP	GO:0019079	viral genome replication	3/51	125/28891	0.00141494	0.00584082	0.0021429	Ifih1/Eif2ak2/Rsad2	3
GO:0022604	BP	GO:0022604	regulation of cell morphogenesis	4/51	277/28891	0.00145021	0.00596462	0.00218832	Icam1/Ccl3/Fgr/Il6	4
GO:0043270	BP	GO:0043270	positive regulation of monoatomic ion transport	4/51	277/28891	0.00145021	0.00596462	0.00218832	Cxcl10/Lcn2/Stc1/Ccl2	4
GO:0001780	BP	GO:0001780	neutrophil homeostasis	2/51	32/28891	0.00146486	0.00598128	0.00219443	Fcgr2b/Il6	2
GO:0001945	BP	GO:0001945	lymph vessel development	2/51	32/28891	0.00146486	0.00598128	0.00219443	Fgf2/Syk	2
GO:0006837	BP	GO:0006837	serotonin transport	2/51	32/28891	0.00146486	0.00598128	0.00219443	Fcer1g/Syk	2
GO:0090077	BP	GO:0090077	foam cell differentiation	2/51	32/28891	0.00146486	0.00598128	0.00219443	Msr1/Nfkbia	2
GO:0033138	BP	GO:0033138	positive regulation of peptidyl-serine phosphorylation	3/51	127/28891	0.00148084	0.00603564	0.00221437	Lif/Csf3/Il6	3
GO:0002825	BP	GO:0002825	regulation of T-helper 1 type immune response	2/51	33/28891	0.00155761	0.00625815	0.00229601	Il4ra/Il1b	2
GO:0032647	BP	GO:0032647	regulation of interferon-alpha production	2/51	33/28891	0.00155761	0.00625815	0.00229601	Ifih1/Irf7	2
GO:0050999	BP	GO:0050999	regulation of nitric-oxide synthase activity	2/51	33/28891	0.00155761	0.00625815	0.00229601	Il1a/Il1b	2
GO:0060669	BP	GO:0060669	embryonic placenta morphogenesis	2/51	33/28891	0.00155761	0.00625815	0.00229601	Socs3/Ccn1	2
GO:0072574	BP	GO:0072574	hepatocyte proliferation	2/51	33/28891	0.00155761	0.00625815	0.00229601	Tnfaip3/Il6	2
GO:0072575	BP	GO:0072575	epithelial cell proliferation involved in liver morphogenesis	2/51	33/28891	0.00155761	0.00625815	0.00229601	Tnfaip3/Il6	2
GO:0090594	BP	GO:0090594	inflammatory response to wounding	2/51	33/28891	0.00155761	0.00625815	0.00229601	Il1a/Il6	2
GO:2000352	BP	GO:2000352	negative regulation of endothelial cell apoptotic process	2/51	33/28891	0.00155761	0.00625815	0.00229601	Icam1/Tnfaip3	2
GO:0043280	BP	GO:0043280	positive regulation of cysteine-type endopeptidase activity involved in apoptotic process	3/51	130/28891	0.00158327	0.00634995	0.00232969	Fas/Ccn1/Syk	3
GO:0001796	BP	GO:0001796	regulation of type IIa hypersensitivity	2/51	34/28891	0.00165309	0.00658322	0.00241527	Fcer1g/H2-Q4	2
GO:0001798	BP	GO:0001798	positive regulation of type IIa hypersensitivity	2/51	34/28891	0.00165309	0.00658322	0.00241527	Fcer1g/H2-Q4	2
GO:0002892	BP	GO:0002892	regulation of type II hypersensitivity	2/51	34/28891	0.00165309	0.00658322	0.00241527	Fcer1g/H2-Q4	2
GO:0002894	BP	GO:0002894	positive regulation of type II hypersensitivity	2/51	34/28891	0.00165309	0.00658322	0.00241527	Fcer1g/H2-Q4	2
GO:0001794	BP	GO:0001794	type IIa hypersensitivity	2/51	35/28891	0.00175131	0.00680196	0.00249552	Fcer1g/H2-Q4	2
GO:0002445	BP	GO:0002445	type II hypersensitivity	2/51	35/28891	0.00175131	0.00680196	0.00249552	Fcer1g/H2-Q4	2
GO:0034110	BP	GO:0034110	regulation of homotypic cell-cell adhesion	2/51	35/28891	0.00175131	0.00680196	0.00249552	Il6/Syk	2
GO:0060142	BP	GO:0060142	regulation of syncytium formation by plasma membrane fusion	2/51	35/28891	0.00175131	0.00680196	0.00249552	Il4ra/Cxcl10	2
GO:0071404	BP	GO:0071404	cellular response to low-density lipoprotein particle stimulus	2/51	35/28891	0.00175131	0.00680196	0.00249552	Fcer1g/Syk	2
GO:0050767	BP	GO:0050767	regulation of neurogenesis	5/51	494/28891	0.00176105	0.00680196	0.00249552	Fas/Fgf2/Il1b/Lif/Il6	5
GO:0001811	BP	GO:0001811	negative regulation of type I hypersensitivity	1/51	1/28891	0.00176526	0.00680196	0.00249552	Fcgr2b	1
GO:0002384	BP	GO:0002384	hepatic immune response	1/51	1/28891	0.00176526	0.00680196	0.00249552	Il6	1
GO:0002631	NA	GO:0002631	regulation of granuloma formation	1/51	1/28891	0.00176526	0.00680196	0.00249552	Tnfaip3	1
GO:0002632	NA	GO:0002632	negative regulation of granuloma formation	1/51	1/28891	0.00176526	0.00680196	0.00249552	Tnfaip3	1
GO:0003421	BP	GO:0003421	growth plate cartilage axis specification	1/51	1/28891	0.00176526	0.00680196	0.00249552	Stc1	1
GO:0009635	BP	GO:0009635	response to herbicide	1/51	1/28891	0.00176526	0.00680196	0.00249552	Lcn2	1
GO:0014843	BP	GO:0014843	growth factor dependent regulation of skeletal muscle satellite cell proliferation	1/51	1/28891	0.00176526	0.00680196	0.00249552	Fgf2	1
GO:0034147	BP	GO:0034147	regulation of toll-like receptor 5 signaling pathway	1/51	1/28891	0.00176526	0.00680196	0.00249552	Tnfaip3	1
GO:0034148	BP	GO:0034148	negative regulation of toll-like receptor 5 signaling pathway	1/51	1/28891	0.00176526	0.00680196	0.00249552	Tnfaip3	1
GO:0070429	BP	GO:0070429	negative regulation of nucleotide-binding oligomerization domain containing 1 signaling pathway	1/51	1/28891	0.00176526	0.00680196	0.00249552	Tnfaip3	1
GO:0110090	BP	GO:0110090	positive regulation of hippocampal neuron apoptotic process	1/51	1/28891	0.00176526	0.00680196	0.00249552	Lcn2	1
GO:1903403	BP	GO:1903403	negative regulation of renal phosphate excretion	1/51	1/28891	0.00176526	0.00680196	0.00249552	Stc1	1
GO:1904445	BP	GO:1904445	negative regulation of establishment of Sertoli cell barrier	1/51	1/28891	0.00176526	0.00680196	0.00249552	Il1a	1
GO:0009636	BP	GO:0009636	response to toxic substance	3/51	136/28891	0.00180121	0.00692867	0.00254201	Fas/Lcn2/Eif2ak2	3
GO:0002688	BP	GO:0002688	regulation of leukocyte chemotaxis	3/51	137/28891	0.00183926	0.00704099	0.00258322	Cxcl10/Il1b/Ccl2	3
GO:0032607	BP	GO:0032607	interferon-alpha production	2/51	36/28891	0.00185224	0.00704099	0.00258322	Ifih1/Irf7	2
GO:0048710	BP	GO:0048710	regulation of astrocyte differentiation	2/51	36/28891	0.00185224	0.00704099	0.00258322	Il1b/Lif	2
GO:0055094	BP	GO:0055094	response to lipoprotein particle	2/51	36/28891	0.00185224	0.00704099	0.00258322	Fcer1g/Syk	2
GO:0072576	BP	GO:0072576	liver morphogenesis	2/51	36/28891	0.00185224	0.00704099	0.00258322	Tnfaip3/Il6	2
GO:0090025	BP	GO:0090025	regulation of monocyte chemotaxis	2/51	36/28891	0.00185224	0.00704099	0.00258322	Cxcl10/Ccl2	2
GO:1904994	BP	GO:1904994	regulation of leukocyte adhesion to vascular endothelial cell	2/51	36/28891	0.00185224	0.00704099	0.00258322	Icam1/Il6	2
GO:0030316	BP	GO:0030316	osteoclast differentiation	3/51	138/28891	0.00187781	0.00712619	0.00261448	Fcer1g/Ccl3/Fos	3
GO:0014047	BP	GO:0014047	glutamate secretion	2/51	37/28891	0.00195587	0.00738522	0.00270951	Il1b/Il1rn	2
GO:0033687	BP	GO:0033687	osteoblast proliferation	2/51	37/28891	0.00195587	0.00738522	0.00270951	Ccn1/Eif2ak2	2
GO:0039532	BP	GO:0039532	negative regulation of viral-induced cytoplasmic pattern recognition receptor signaling pathway	2/51	37/28891	0.00195587	0.00738522	0.00270951	Trim30a/Tnfaip3	2
GO:0045121	CC	GO:0045121	membrane raft	5/51	301/28573	0.000198262	0.00744923	0.0036734	Fas/Icam1/Fcer1g/Cd14/Lcp2	5
GO:0098857	CC	GO:0098857	membrane microdomain	5/51	302/28573	0.000201331	0.00744923	0.0036734	Fas/Icam1/Fcer1g/Cd14/Lcp2	5
GO:0005539	MF	GO:0005539	glycosaminoglycan binding	4/51	243/28407	0.000952276	0.00769146	0.00358549	Cxcl10/Fgf2/Ccn1/Ccl2	4
GO:0033032	BP	GO:0033032	regulation of myeloid cell apoptotic process	2/51	38/28891	0.00206221	0.00773499	0.00283783	Fcer1g/Fcgr2b	2
GO:0045672	BP	GO:0045672	positive regulation of osteoclast differentiation	2/51	38/28891	0.00206221	0.00773499	0.00283783	Ccl3/Fos	2
GO:0051953	BP	GO:0051953	negative regulation of amine transport	2/51	38/28891	0.00206221	0.00773499	0.00283783	Il1b/Il1rn	2
GO:1904646	BP	GO:1904646	cellular response to amyloid-beta	2/51	38/28891	0.00206221	0.00773499	0.00283783	Icam1/Fcgr2b	2
GO:0019865	MF	GO:0019865	immunoglobulin binding	2/51	26/28407	0.000999104	0.00777081	0.00362248	Fcer1g/Fcgr2b	2
GO:0001773	BP	GO:0001773	myeloid dendritic cell activation	2/51	39/28891	0.00217123	0.00807683	0.00296325	Tnfsf9/Relb	2
GO:0002885	BP	GO:0002885	positive regulation of hypersensitivity	2/51	39/28891	0.00217123	0.00807683	0.00296325	Fcer1g/H2-Q4	2
GO:0060674	BP	GO:0060674	placenta blood vessel development	2/51	39/28891	0.00217123	0.00807683	0.00296325	Socs3/Ccn1	2
GO:0071402	BP	GO:0071402	cellular response to lipoprotein particle stimulus	2/51	39/28891	0.00217123	0.00807683	0.00296325	Fcer1g/Syk	2
GO:1900225	BP	GO:1900225	regulation of NLRP3 inflammasome complex assembly	2/51	39/28891	0.00217123	0.00807683	0.00296325	Trim30a/Eif2ak2	2
GO:0051219	MF	GO:0051219	phosphoprotein binding	3/51	112/28407	0.00108253	0.00811897	0.00378478	Socs3/Fgr/Syk	3
GO:0030336	BP	GO:0030336	negative regulation of cell migration	4/51	313/28891	0.00226249	0.00840246	0.00308272	Fas/Fgf2/Stc1/Il1rn	4
GO:0030212	BP	GO:0030212	hyaluronan metabolic process	2/51	40/28891	0.00228293	0.00845059	0.00310038	Fgf2/Il1b	2
GO:0045622	BP	GO:0045622	regulation of T-helper cell differentiation	2/51	40/28891	0.00228293	0.00845059	0.00310038	Il4ra/Il6	2
GO:0043123	BP	GO:0043123	positive regulation of I-kappaB kinase/NF-kappaB signaling	3/51	148/28891	0.00229125	0.00845366	0.0031015	Il1a/Trim30a/Il1b	3
GO:2001056	BP	GO:2001056	positive regulation of cysteine-type endopeptidase activity	3/51	148/28891	0.00229125	0.00845366	0.0031015	Fas/Ccn1/Syk	3
GO:0043491	BP	GO:0043491	protein kinase B signaling	4/51	317/28891	0.0023687	0.00872515	0.00320111	Fgf2/Fgr/Csf3/Il6	4
GO:0120161	BP	GO:0120161	regulation of cold-induced thermogenesis	3/51	150/28891	0.00238016	0.00875308	0.00321136	Il4ra/Lcn2/Syk	3
GO:0015850	BP	GO:0015850	organic hydroxy compound transport	4/51	318/28891	0.00239578	0.00877328	0.00321876	Msr1/Fcer1g/Nfkbia/Syk	4
GO:0002866	BP	GO:0002866	positive regulation of acute inflammatory response to antigenic stimulus	2/51	41/28891	0.0023973	0.00877328	0.00321876	Fcer1g/H2-Q4	2
GO:0032743	BP	GO:0032743	positive regulation of interleukin-2 production	2/51	41/28891	0.0023973	0.00877328	0.00321876	Il1a/Il1b	2
GO:0030072	BP	GO:0030072	peptide hormone secretion	4/51	321/28891	0.0024783	0.00905501	0.00332213	Il1b/Il1rn/Lif/Il6	4
GO:0042119	BP	GO:0042119	neutrophil activation	2/51	42/28891	0.00251434	0.00912438	0.00334758	Fcer1g/Syk	2
GO:0044546	BP	GO:0044546	NLRP3 inflammasome complex assembly	2/51	42/28891	0.00251434	0.00912438	0.00334758	Trim30a/Eif2ak2	2
GO:1901532	BP	GO:1901532	regulation of hematopoietic progenitor cell differentiation	2/51	42/28891	0.00251434	0.00912438	0.00334758	Fas/Eif2ak2	2
GO:0046328	BP	GO:0046328	regulation of JNK cascade	3/51	153/28891	0.00251749	0.00912438	0.00334758	Il1a/Fcgr2b/Il1b	3
GO:0051783	BP	GO:0051783	regulation of nuclear division	3/51	153/28891	0.00251749	0.00912438	0.00334758	Il1a/Il1b/Lif	3
GO:0010721	BP	GO:0010721	negative regulation of cell development	4/51	323/28891	0.00253439	0.00917092	0.00336465	Il4ra/Fas/Il1a/Il1b	4
GO:0002761	BP	GO:0002761	regulation of myeloid leukocyte differentiation	3/51	154/28891	0.00256433	0.00924962	0.00339353	Ccl3/Lif/Fos	3
GO:0106106	BP	GO:0106106	cold-induced thermogenesis	3/51	154/28891	0.00256433	0.00924962	0.00339353	Il4ra/Lcn2/Syk	3
GO:2000146	BP	GO:2000146	negative regulation of cell motility	4/51	326/28891	0.00262016	0.00943591	0.00346187	Fas/Fgf2/Stc1/Il1rn	4
GO:0061081	BP	GO:0061081	positive regulation of myeloid leukocyte cytokine production involved in immune response	2/51	43/28891	0.00263402	0.00945566	0.00346912	Fcer1g/Syk	2
GO:0097028	BP	GO:0097028	dendritic cell differentiation	2/51	43/28891	0.00263402	0.00945566	0.00346912	Tnfsf9/Relb	2
GO:0006874	BP	GO:0006874	intracellular calcium ion homeostasis	4/51	327/28891	0.00264918	0.00949501	0.00348356	Cxcl10/Fgf2/Stc1/Ccl2	4
GO:0141060	NA	GO:0141060	GO:0141060	3/51	156/28891	0.00265964	0.00951737	0.00349176	Cxcl10/Gbp2/Syk	3
GO:0002790	BP	GO:0002790	peptide secretion	4/51	329/28891	0.0027079	0.00964493	0.00353856	Il1b/Il1rn/Lif/Il6	4
GO:0050769	BP	GO:0050769	positive regulation of neurogenesis	4/51	329/28891	0.0027079	0.00964493	0.00353856	Fgf2/Il1b/Lif/Il6	4
GO:0031341	BP	GO:0031341	regulation of cell killing	3/51	157/28891	0.0027081	0.00964493	0.00353856	H2-Q4/Ccl2/Syk	3
GO:0032660	BP	GO:0032660	regulation of interleukin-17 production	2/51	44/28891	0.00275634	0.00975521	0.00357902	Ccn1/Il6	2
GO:0032735	BP	GO:0032735	positive regulation of interleukin-12 production	2/51	44/28891	0.00275634	0.00975521	0.00357902	Tnfsf9/Syk	2
GO:0046627	BP	GO:0046627	negative regulation of insulin receptor signaling pathway	2/51	44/28891	0.00275634	0.00975521	0.00357902	Socs3/Il1b	2
GO:1904645	BP	GO:1904645	response to amyloid-beta	2/51	44/28891	0.00275634	0.00975521	0.00357902	Icam1/Fcgr2b	2
GO:0050708	BP	GO:0050708	regulation of protein secretion	4/51	331/28891	0.00276751	0.00977939	0.00358789	Il1a/Il1b/Rsad2/Il6	4
GO:0051701	BP	GO:0051701	biological process involved in interaction with host	3/51	159/28891	0.00280665	0.00990223	0.00363296	Icam1/Gbp2/Trim30a	3
GO:0005164	MF	GO:0005164	tumor necrosis factor receptor binding	2/51	32/28407	0.00151433	0.0100045	0.00466377	Tnfsf9/Tnfsf8	2
GO:0004713	MF	GO:0004713	protein tyrosine kinase activity	3/51	132/28407	0.00173522	0.0100045	0.00466377	Eif2ak2/Fgr/Syk	3
GO:0004913	MF	GO:0004913	interleukin-4 receptor activity	1/51	1/28407	0.00179533	0.0100045	0.00466377	Il4ra	1
GO:0005151	MF	GO:0005151	interleukin-1, type II receptor binding	1/51	1/28407	0.00179533	0.0100045	0.00466377	Il1rn	1
GO:0005152	MF	GO:0005152	interleukin-1 receptor antagonist activity	1/51	1/28407	0.00179533	0.0100045	0.00466377	Il1rn	1
GO:0016170	MF	GO:0016170	interleukin-15 receptor binding	1/51	1/28407	0.00179533	0.0100045	0.00466377	Syk	1
GO:0016515	NA	GO:0016515	interleukin-13 receptor activity	1/51	1/28407	0.00179533	0.0100045	0.00466377	Il13ra1	1
GO:0045352	MF	GO:0045352	interleukin-1 type I receptor antagonist activity	1/51	1/28407	0.00179533	0.0100045	0.00466377	Il1rn	1
GO:0045353	MF	GO:0045353	interleukin-1 type II receptor antagonist activity	1/51	1/28407	0.00179533	0.0100045	0.00466377	Il1rn	1
GO:0019956	MF	GO:0019956	chemokine binding	2/51	35/28407	0.00181035	0.0100045	0.00466377	Fgf2/Ccrl2	2
GO:0033135	BP	GO:0033135	regulation of peptidyl-serine phosphorylation	3/51	160/28891	0.00285675	0.0100633	0.00369203	Lif/Csf3/Il6	3
GO:0032768	BP	GO:0032768	regulation of monooxygenase activity	2/51	45/28891	0.0028813	0.0101182	0.00371217	Il1a/Il1b	2
GO:0140632	BP	GO:0140632	inflammasome complex assembly	2/51	45/28891	0.0028813	0.0101182	0.00371217	Trim30a/Eif2ak2	2
GO:0034504	BP	GO:0034504	protein localization to nucleus	4/51	335/28891	0.00288941	0.0101309	0.00371685	Nfkbia/Bcl3/Il6/Syk	4
GO:0045667	BP	GO:0045667	regulation of osteoblast differentiation	3/51	162/28891	0.0029586	0.0103574	0.00379995	Fgf2/Ccn1/Il6	3
GO:0042554	BP	GO:0042554	superoxide anion generation	2/51	46/28891	0.00300888	0.0104898	0.00384852	Cybb/Syk	2
GO:0045840	BP	GO:0045840	positive regulation of mitotic nuclear division	2/51	46/28891	0.00300888	0.0104898	0.00384852	Il1a/Il1b	2
GO:1904019	BP	GO:1904019	epithelial cell apoptotic process	3/51	163/28891	0.00301035	0.0104898	0.00384852	Fas/Icam1/Tnfaip3	3
GO:0007613	BP	GO:0007613	memory	3/51	164/28891	0.00306266	0.0106556	0.00390935	Lcn2/Il1b/Il1rn	3
GO:0001933	BP	GO:0001933	negative regulation of protein phosphorylation	4/51	342/28891	0.00311153	0.010809	0.00396563	Socs3/Il1b/Tnfaip3/Il6	4
GO:0002691	BP	GO:0002691	regulation of cellular extravasation	2/51	47/28891	0.00313907	0.0108214	0.00397019	Icam1/Ccl2	2
GO:0002863	BP	GO:0002863	positive regulation of inflammatory response to antigenic stimulus	2/51	47/28891	0.00313907	0.0108214	0.00397019	Fcer1g/H2-Q4	2
GO:0032620	BP	GO:0032620	interleukin-17 production	2/51	47/28891	0.00313907	0.0108214	0.00397019	Ccn1/Il6	2
GO:0048246	BP	GO:0048246	macrophage chemotaxis	2/51	47/28891	0.00313907	0.0108214	0.00397019	Ccl3/Ccl2	2
GO:0060338	BP	GO:0060338	regulation of type I interferon-mediated signaling pathway	2/51	47/28891	0.00313907	0.0108214	0.00397019	Ikbke/Irf7	2
GO:0015833	BP	GO:0015833	peptide transport	4/51	343/28891	0.00314419	0.0108225	0.0039706	Il1b/Il1rn/Lif/Il6	4
GO:0043087	BP	GO:0043087	regulation of GTPase activity	4/51	345/28891	0.00321021	0.0110329	0.0040478	Icam1/Ccl3/Ccl2/Ccl4	4
GO:0031099	BP	GO:0031099	regeneration	3/51	167/28891	0.00322293	0.0110599	0.00405767	Fas/Lif/Il6	3
GO:1901653	BP	GO:1901653	cellular response to peptide	4/51	346/28891	0.00324357	0.0111138	0.00407745	Icam1/Socs3/Fcgr2b/Il1b	4
GO:0048536	BP	GO:0048536	spleen development	2/51	48/28891	0.00327187	0.0111938	0.00410679	Fas/Bcl3	2
GO:2000377	BP	GO:2000377	regulation of reactive oxygen species metabolic process	3/51	168/28891	0.00327748	0.011196	0.00410762	Trim30a/Lcn2/Syk	3
GO:1901681	MF	GO:1901681	sulfur compound binding	4/51	301/28407	0.00208727	0.0112392	0.00523931	Cxcl10/Fgf2/Ccn1/Ccl2	4
GO:0010950	BP	GO:0010950	positive regulation of endopeptidase activity	3/51	169/28891	0.0033326	0.0113499	0.00416409	Fas/Ccn1/Syk	3
GO:0043433	BP	GO:0043433	negative regulation of DNA-binding transcription factor activity	3/51	169/28891	0.0033326	0.0113499	0.00416409	Nfkbia/Bcl3/Tnfaip3	3
GO:0006865	BP	GO:0006865	amino acid transport	3/51	170/28891	0.00338828	0.0114112	0.00418656	Il1b/Il1rn/Nfkbie	3
GO:0034198	BP	GO:0034198	cellular response to amino acid starvation	2/51	49/28891	0.00340726	0.0114112	0.00418656	Fas/Eif2ak2	2
GO:1900077	BP	GO:1900077	negative regulation of cellular response to insulin stimulus	2/51	49/28891	0.00340726	0.0114112	0.00418656	Socs3/Il1b	2
GO:1902624	BP	GO:1902624	positive regulation of neutrophil migration	2/51	49/28891	0.00340726	0.0114112	0.00418656	Il1a/Il1b	2
GO:0032956	BP	GO:0032956	regulation of actin cytoskeleton organization	4/51	351/28891	0.00341393	0.0114112	0.00418656	Icam1/Il1a/Fgr/Csf3	4
GO:0034250	BP	GO:0034250	positive regulation of amide metabolic process	3/51	171/28891	0.00344452	0.0114112	0.00418656	Bcl3/Ccn1/Il6	3
GO:2001236	BP	GO:2001236	regulation of extrinsic apoptotic signaling pathway	3/51	171/28891	0.00344452	0.0114112	0.00418656	Icam1/Il1b/Tnfaip3	3
GO:0055074	BP	GO:0055074	calcium ion homeostasis	4/51	353/28891	0.00348376	0.0114112	0.00418656	Cxcl10/Fgf2/Stc1/Ccl2	4
GO:0050728	BP	GO:0050728	negative regulation of inflammatory response	3/51	172/28891	0.00350134	0.0114112	0.00418656	Socs3/Fcgr2b/Tnfaip3	3
GO:0002041	BP	GO:0002041	intussusceptive angiogenesis	1/51	2/28891	0.00352746	0.0114112	0.00418656	Ccn1	1
GO:0002266	BP	GO:0002266	follicular dendritic cell activation	1/51	2/28891	0.00352746	0.0114112	0.00418656	Bcl3	1
GO:0002268	BP	GO:0002268	follicular dendritic cell differentiation	1/51	2/28891	0.00352746	0.0114112	0.00418656	Bcl3	1
GO:0003422	BP	GO:0003422	growth plate cartilage morphogenesis	1/51	2/28891	0.00352746	0.0114112	0.00418656	Stc1	1
GO:0015891	BP	GO:0015891	siderophore transport	1/51	2/28891	0.00352746	0.0114112	0.00418656	Lcn2	1
GO:0021762	BP	GO:0021762	substantia nigra development	1/51	2/28891	0.00352746	0.0114112	0.00418656	Fgf2	1
GO:0032665	BP	GO:0032665	regulation of interleukin-21 production	1/51	2/28891	0.00352746	0.0114112	0.00418656	Il6	1
GO:0032745	BP	GO:0032745	positive regulation of interleukin-21 production	1/51	2/28891	0.00352746	0.0114112	0.00418656	Il6	1
GO:0033197	BP	GO:0033197	response to vitamin E	1/51	2/28891	0.00352746	0.0114112	0.00418656	Eif2ak2	1
GO:0034127	BP	GO:0034127	regulation of MyD88-independent toll-like receptor signaling pathway	1/51	2/28891	0.00352746	0.0114112	0.00418656	Irf7	1
GO:0034146	BP	GO:0034146	toll-like receptor 5 signaling pathway	1/51	2/28891	0.00352746	0.0114112	0.00418656	Tnfaip3	1
GO:0034758	BP	GO:0034758	positive regulation of iron ion transport	1/51	2/28891	0.00352746	0.0114112	0.00418656	Lcn2	1
GO:0034761	BP	GO:0034761	positive regulation of iron ion transmembrane transport	1/51	2/28891	0.00352746	0.0114112	0.00418656	Lcn2	1
GO:0035504	BP	GO:0035504	regulation of myosin light chain kinase activity	1/51	2/28891	0.00352746	0.0114112	0.00418656	Il1b	1
GO:0035505	BP	GO:0035505	positive regulation of myosin light chain kinase activity	1/51	2/28891	0.00352746	0.0114112	0.00418656	Il1b	1
GO:0042942	BP	GO:0042942	D-serine transport	1/51	2/28891	0.00352746	0.0114112	0.00418656	Nfkbie	1
GO:0044722	BP	GO:0044722	renal phosphate excretion	1/51	2/28891	0.00352746	0.0114112	0.00418656	Stc1	1
GO:0045609	BP	GO:0045609	positive regulation of inner ear auditory receptor cell differentiation	1/51	2/28891	0.00352746	0.0114112	0.00418656	Fgf2	1
GO:0045633	BP	GO:0045633	positive regulation of mechanoreceptor differentiation	1/51	2/28891	0.00352746	0.0114112	0.00418656	Fgf2	1
GO:0072573	BP	GO:0072573	tolerance induction to lipopolysaccharide	1/51	2/28891	0.00352746	0.0114112	0.00418656	Tnfaip3	1
GO:1902748	BP	GO:1902748	positive regulation of lens fiber cell differentiation	1/51	2/28891	0.00352746	0.0114112	0.00418656	Fgf2	1
GO:1903402	BP	GO:1903402	regulation of renal phosphate excretion	1/51	2/28891	0.00352746	0.0114112	0.00418656	Stc1	1
GO:1903597	BP	GO:1903597	negative regulation of gap junction assembly	1/51	2/28891	0.00352746	0.0114112	0.00418656	Il1b	1
GO:1904440	BP	GO:1904440	positive regulation of iron ion import across plasma membrane	1/51	2/28891	0.00352746	0.0114112	0.00418656	Lcn2	1
GO:2000349	BP	GO:2000349	negative regulation of CD40 signaling pathway	1/51	2/28891	0.00352746	0.0114112	0.00418656	Tnfaip3	1
GO:2000982	BP	GO:2000982	positive regulation of inner ear receptor cell differentiation	1/51	2/28891	0.00352746	0.0114112	0.00418656	Fgf2	1
GO:0033628	BP	GO:0033628	regulation of cell adhesion mediated by integrin	2/51	50/28891	0.00354524	0.0114523	0.00420164	Lif/Syk	2
GO:1990845	BP	GO:1990845	adaptive thermogenesis	3/51	173/28891	0.00355874	0.0114795	0.00421162	Il4ra/Lcn2/Syk	3
GO:0040013	BP	GO:0040013	negative regulation of locomotion	4/51	358/28891	0.00366257	0.0117716	0.00431879	Fas/Fgf2/Stc1/Il1rn	4
GO:0007596	BP	GO:0007596	blood coagulation	3/51	175/28891	0.00367524	0.0117716	0.00431879	Fcer1g/Il6/Syk	3
GO:0007520	BP	GO:0007520	myoblast fusion	2/51	51/28891	0.00368579	0.0117716	0.00431879	Il4ra/Cxcl10	2
GO:0036230	BP	GO:0036230	granulocyte activation	2/51	51/28891	0.00368579	0.0117716	0.00431879	Fcer1g/Syk	2
GO:0061028	BP	GO:0061028	establishment of endothelial barrier	2/51	51/28891	0.00368579	0.0117716	0.00431879	Icam1/Il1b	2
GO:0140894	BP	GO:0140894	endolysosomal toll-like receptor signaling pathway	2/51	51/28891	0.00368579	0.0117716	0.00431879	Rsad2/Tnfaip3	2
GO:1902041	BP	GO:1902041	regulation of extrinsic apoptotic signaling pathway via death domain receptors	2/51	51/28891	0.00368579	0.0117716	0.00431879	Icam1/Tnfaip3	2
GO:0006913	BP	GO:0006913	nucleocytoplasmic transport	4/51	359/28891	0.00369907	0.0117807	0.00432212	Nfkbia/Bcl3/Il6/Syk	4
GO:0051169	BP	GO:0051169	nuclear transport	4/51	359/28891	0.00369907	0.0117807	0.00432212	Nfkbia/Bcl3/Il6/Syk	4
GO:0010594	BP	GO:0010594	regulation of endothelial cell migration	3/51	177/28891	0.00379406	0.0120662	0.00442688	Fgf2/Lcn2/Stc1	3
GO:0010518	BP	GO:0010518	positive regulation of phospholipase activity	2/51	52/28891	0.00382891	0.0121258	0.00444874	Fgf2/Ccn1	2
GO:0032728	BP	GO:0032728	positive regulation of interferon-beta production	2/51	52/28891	0.00382891	0.0121258	0.00444874	Ifih1/Irf7	2
GO:0050687	BP	GO:0050687	negative regulation of defense response to virus	2/51	52/28891	0.00382891	0.0121258	0.00444874	Trim30a/Tnfaip3	2
GO:0019838	MF	GO:0019838	growth factor binding	3/51	146/28407	0.00231207	0.0121384	0.00565848	Il2rg/Ccn1/Il1rn	3
GO:0050817	BP	GO:0050817	coagulation	3/51	178/28891	0.00385434	0.0121892	0.00447202	Fcer1g/Il6/Syk	3
GO:0007599	BP	GO:0007599	hemostasis	3/51	179/28891	0.00391521	0.0123644	0.00453628	Fcer1g/Il6/Syk	3
GO:0002920	BP	GO:0002920	regulation of humoral immune response	2/51	53/28891	0.00397459	0.0124886	0.00458184	Fcgr2b/Il1b	2
GO:0046456	BP	GO:0046456	icosanoid biosynthetic process	2/51	53/28891	0.00397459	0.0124886	0.00458184	Il1b/Syk	2
GO:0046641	BP	GO:0046641	positive regulation of alpha-beta T cell proliferation	2/51	53/28891	0.00397459	0.0124886	0.00458184	H2-Q4/Syk	2
GO:0015718	BP	GO:0015718	monocarboxylic acid transport	3/51	180/28891	0.00397666	0.0124886	0.00458184	Il1a/Il1b/Syk	3
GO:0007254	BP	GO:0007254	JNK cascade	3/51	181/28891	0.00403869	0.0126658	0.00464686	Il1a/Fcgr2b/Il1b	3
GO:0010718	BP	GO:0010718	positive regulation of epithelial to mesenchymal transition	2/51	54/28891	0.00412282	0.0128228	0.00470445	Il1b/Il6	2
GO:0032715	BP	GO:0032715	negative regulation of interleukin-6 production	2/51	54/28891	0.00412282	0.0128228	0.00470445	Trim30a/Tnfaip3	2
GO:0045124	BP	GO:0045124	regulation of bone resorption	2/51	54/28891	0.00412282	0.0128228	0.00470445	Il6/Syk	2
GO:0061756	BP	GO:0061756	leukocyte adhesion to vascular endothelial cell	2/51	54/28891	0.00412282	0.0128228	0.00470445	Icam1/Il6	2
GO:0098586	BP	GO:0098586	cellular response to virus	2/51	54/28891	0.00412282	0.0128228	0.00470445	Ikbke/Il6	2
GO:1990928	BP	GO:1990928	response to amino acid starvation	2/51	54/28891	0.00412282	0.0128228	0.00470445	Fas/Eif2ak2	2
GO:0042326	BP	GO:0042326	negative regulation of phosphorylation	4/51	372/28891	0.0041963	0.0130154	0.00477514	Socs3/Il1b/Tnfaip3/Il6	4
GO:0045862	BP	GO:0045862	positive regulation of proteolysis	4/51	372/28891	0.0041963	0.0130154	0.00477514	Fas/Ccn1/Il1b/Syk	4
GO:0001890	BP	GO:0001890	placenta development	3/51	184/28891	0.00422833	0.0130789	0.00479841	Socs3/Ccn1/Lif	3
GO:0050851	BP	GO:0050851	antigen receptor-mediated signaling pathway	3/51	184/28891	0.00422833	0.0130789	0.00479841	Nfkbia/Lcp2/Syk	3
GO:0002507	BP	GO:0002507	tolerance induction	2/51	55/28891	0.00427359	0.0131289	0.00481678	H2-Q4/Tnfaip3	2
GO:0002823	BP	GO:0002823	negative regulation of adaptive immune response based on somatic recombination of immune receptors built from immunoglobulin superfamily domains	2/51	55/28891	0.00427359	0.0131289	0.00481678	Il4ra/Fcgr2b	2
GO:0032965	BP	GO:0032965	regulation of collagen biosynthetic process	2/51	55/28891	0.00427359	0.0131289	0.00481678	Ccl2/Il6	2
GO:0050853	BP	GO:0050853	B cell receptor signaling pathway	2/51	55/28891	0.00427359	0.0131289	0.00481678	Nfkbia/Syk	2
GO:0140374	BP	GO:0140374	antiviral innate immune response	2/51	55/28891	0.00427359	0.0131289	0.00481678	Ifih1/Eif2ak2	2
GO:0002832	BP	GO:0002832	negative regulation of response to biotic stimulus	3/51	187/28891	0.00442332	0.013563	0.00497603	Trim30a/H2-Q4/Tnfaip3	3
GO:0042531	BP	GO:0042531	positive regulation of tyrosine phosphorylation of STAT protein	2/51	56/28891	0.00442689	0.013563	0.00497603	Lif/Il6	2
GO:0005044	MF	GO:0005044	scavenger receptor activity	2/51	43/28407	0.0027224	0.013612	0.00634544	Msr1/Endou	2
GO:0015026	MF	GO:0015026	coreceptor activity	2/51	43/28407	0.0027224	0.013612	0.00634544	Csf2rb/Il2rg	2
GO:0051302	BP	GO:0051302	regulation of cell division	3/51	188/28891	0.0044895	0.0137362	0.00503957	Il1a/Fgf2/Il1b	3
GO:0002888	BP	GO:0002888	positive regulation of myeloid leukocyte mediated immunity	2/51	57/28891	0.00458272	0.013927	0.00510958	Fcer1g/H2-Q4	2
GO:0010596	BP	GO:0010596	negative regulation of endothelial cell migration	2/51	57/28891	0.00458272	0.013927	0.00510958	Fgf2/Stc1	2
GO:0030838	BP	GO:0030838	positive regulation of actin filament polymerization	2/51	57/28891	0.00458272	0.013927	0.00510958	Icam1/Csf3	2
GO:0051955	BP	GO:0051955	regulation of amino acid transport	2/51	57/28891	0.00458272	0.013927	0.00510958	Il1b/Il1rn	2
GO:0070527	BP	GO:0070527	platelet aggregation	2/51	57/28891	0.00458272	0.013927	0.00510958	Il6/Syk	2
GO:0002455	BP	GO:0002455	humoral immune response mediated by circulating immunoglobulin	2/51	58/28891	0.00474105	0.0143119	0.00525079	Bcl3/Fcgr2b	2
GO:0002474	BP	GO:0002474	antigen processing and presentation of peptide antigen via MHC class I	2/51	58/28891	0.00474105	0.0143119	0.00525079	Fcer1g/H2-Q4	2
GO:0034142	BP	GO:0034142	toll-like receptor 4 signaling pathway	2/51	58/28891	0.00474105	0.0143119	0.00525079	Nfkbia/Cd14	2
GO:0036037	BP	GO:0036037	CD8-positive, alpha-beta T cell activation	2/51	58/28891	0.00474105	0.0143119	0.00525079	H2-Q4/Tnfsf8	2
GO:0045687	BP	GO:0045687	positive regulation of glial cell differentiation	2/51	58/28891	0.00474105	0.0143119	0.00525079	Il1b/Lif	2
GO:0010952	BP	GO:0010952	positive regulation of peptidase activity	3/51	193/28891	0.00482947	0.0145399	0.00533445	Fas/Ccn1/Syk	3
GO:0048660	BP	GO:0048660	regulation of smooth muscle cell proliferation	3/51	193/28891	0.00482947	0.0145399	0.00533445	Fgf2/Tnfaip3/Il6	3
GO:0140313	MF	GO:0140313	molecular sequestering activity	2/51	45/28407	0.00297786	0.014543	0.00677946	Nfkbia/Lcn2	2
GO:0001961	BP	GO:0001961	positive regulation of cytokine-mediated signaling pathway	2/51	59/28891	0.00490189	0.0146797	0.00538572	Ikbke/Irf7	2
GO:0032892	BP	GO:0032892	positive regulation of organic acid transport	2/51	59/28891	0.00490189	0.0146797	0.00538572	Il1a/Il1b	2
GO:0140353	BP	GO:0140353	lipid export from cell	2/51	59/28891	0.00490189	0.0146797	0.00538572	Il1a/Il1b	2
GO:2000351	BP	GO:2000351	regulation of endothelial cell apoptotic process	2/51	59/28891	0.00490189	0.0146797	0.00538572	Icam1/Tnfaip3	2
GO:0006979	BP	GO:0006979	response to oxidative stress	4/51	389/28891	0.00491238	0.0146916	0.0053901	Lcn2/Tnfaip3/Il6/Fos	4
GO:0051962	BP	GO:0051962	positive regulation of nervous system development	4/51	391/28891	0.00500169	0.0149389	0.00548083	Fgf2/Il1b/Lif/Il6	4
GO:0002820	BP	GO:0002820	negative regulation of adaptive immune response	2/51	60/28891	0.00506523	0.0150689	0.00552851	Il4ra/Fcgr2b	2
GO:0043330	BP	GO:0043330	response to exogenous dsRNA	2/51	60/28891	0.00506523	0.0150689	0.00552851	Nfkbia/Ifih1	2
GO:1902622	BP	GO:1902622	regulation of neutrophil migration	2/51	60/28891	0.00506523	0.0150689	0.00552851	Il1a/Il1b	2
GO:0006887	BP	GO:0006887	exocytosis	4/51	395/28891	0.00518358	0.015226	0.00558614	Il4ra/Fcer1g/Fgr/Syk	4
GO:0002432	BP	GO:0002432	granuloma formation	1/51	3/28891	0.00528661	0.015226	0.00558614	Tnfaip3	1
GO:0002436	BP	GO:0002436	immune complex clearance by monocytes and macrophages	1/51	3/28891	0.00528661	0.015226	0.00558614	Ccl2	1
GO:0002884	BP	GO:0002884	negative regulation of hypersensitivity	1/51	3/28891	0.00528661	0.015226	0.00558614	Fcgr2b	1
GO:0031104	BP	GO:0031104	dendrite regeneration	1/51	3/28891	0.00528661	0.015226	0.00558614	Fas	1
GO:0032625	BP	GO:0032625	interleukin-21 production	1/51	3/28891	0.00528661	0.015226	0.00558614	Il6	1
GO:0032752	BP	GO:0032752	positive regulation of interleukin-3 production	1/51	3/28891	0.00528661	0.015226	0.00558614	Syk	1
GO:0034140	BP	GO:0034140	negative regulation of toll-like receptor 3 signaling pathway	1/51	3/28891	0.00528661	0.015226	0.00558614	Tnfaip3	1
GO:0038095	BP	GO:0038095	Fc-epsilon receptor signaling pathway	1/51	3/28891	0.00528661	0.015226	0.00558614	Fcer1g	1
GO:0043366	BP	GO:0043366	beta selection	1/51	3/28891	0.00528661	0.015226	0.00558614	Syk	1
GO:0045585	BP	GO:0045585	positive regulation of cytotoxic T cell differentiation	1/51	3/28891	0.00528661	0.015226	0.00558614	Tnfsf9	1
GO:0060128	BP	GO:0060128	corticotropin hormone secreting cell differentiation	1/51	3/28891	0.00528661	0.015226	0.00558614	Fgf2	1
GO:0060559	BP	GO:0060559	positive regulation of calcidiol 1-monooxygenase activity	1/51	3/28891	0.00528661	0.015226	0.00558614	Il1b	1
GO:0071725	BP	GO:0071725	response to triacyl bacterial lipopeptide	1/51	3/28891	0.00528661	0.015226	0.00558614	Cd14	1
GO:0071727	BP	GO:0071727	cellular response to triacyl bacterial lipopeptide	1/51	3/28891	0.00528661	0.015226	0.00558614	Cd14	1
GO:0072535	BP	GO:0072535	tumor necrosis factor (ligand) superfamily member 11 production	1/51	3/28891	0.00528661	0.015226	0.00558614	Ccn1	1
GO:0090264	BP	GO:0090264	regulation of immune complex clearance by monocytes and macrophages	1/51	3/28891	0.00528661	0.015226	0.00558614	Ccl2	1
GO:0090265	BP	GO:0090265	positive regulation of immune complex clearance by monocytes and macrophages	1/51	3/28891	0.00528661	0.015226	0.00558614	Ccl2	1
GO:0140973	NA	GO:0140973	GO:0140973	1/51	3/28891	0.00528661	0.015226	0.00558614	Gbp2	1
GO:1904438	BP	GO:1904438	regulation of iron ion import across plasma membrane	1/51	3/28891	0.00528661	0.015226	0.00558614	Lcn2	1
GO:1904444	BP	GO:1904444	regulation of establishment of Sertoli cell barrier	1/51	3/28891	0.00528661	0.015226	0.00558614	Il1a	1
GO:1904977	BP	GO:1904977	lymphatic endothelial cell migration	1/51	3/28891	0.00528661	0.015226	0.00558614	Fgf2	1
GO:1905956	BP	GO:1905956	positive regulation of endothelial tube morphogenesis	1/51	3/28891	0.00528661	0.015226	0.00558614	Lcn2	1
GO:2000307	BP	GO:2000307	regulation of tumor necrosis factor (ligand) superfamily member 11 production	1/51	3/28891	0.00528661	0.015226	0.00558614	Ccn1	1
GO:2000309	BP	GO:2000309	positive regulation of tumor necrosis factor (ligand) superfamily member 11 production	1/51	3/28891	0.00528661	0.015226	0.00558614	Ccn1	1
GO:0032813	MF	GO:0032813	tumor necrosis factor receptor superfamily binding	2/51	48/28407	0.00338133	0.015375	0.0071673	Tnfsf9/Tnfsf8	2
GO:0005130	MF	GO:0005130	granulocyte colony-stimulating factor receptor binding	1/51	2/28407	0.0035875	0.015375	0.0071673	Csf3	1
GO:0005150	MF	GO:0005150	interleukin-1, type I receptor binding	1/51	2/28407	0.0035875	0.015375	0.0071673	Il1rn	1
GO:0019772	MF	GO:0019772	low-affinity IgG receptor activity	1/51	2/28407	0.0035875	0.015375	0.0071673	Fcgr2b	1
GO:0140315	NA	GO:0140315	iron ion sequestering activity	1/51	2/28407	0.0035875	0.015375	0.0071673	Lcn2	1
GO:1903981	MF	GO:1903981	enterobactin binding	1/51	2/28407	0.0035875	0.015375	0.0071673	Lcn2	1
GO:0060711	BP	GO:0060711	labyrinthine layer development	2/51	62/28891	0.00539935	0.0154914	0.00568352	Socs3/Ccn1	2
GO:0072577	BP	GO:0072577	endothelial cell apoptotic process	2/51	62/28891	0.00539935	0.0154914	0.00568352	Icam1/Tnfaip3	2
GO:1903409	BP	GO:1903409	reactive oxygen species biosynthetic process	2/51	62/28891	0.00539935	0.0154914	0.00568352	Lcn2/Cybb	2
GO:0007204	BP	GO:0007204	positive regulation of cytosolic calcium ion concentration	3/51	202/28891	0.00547983	0.0156824	0.00575362	Ccl3/Il1b/Ccrl2	3
GO:0048659	BP	GO:0048659	smooth muscle cell proliferation	3/51	202/28891	0.00547983	0.0156824	0.00575362	Fgf2/Tnfaip3/Il6	3
GO:0046879	BP	GO:0046879	hormone secretion	4/51	403/28891	0.0055606	0.0158404	0.00581159	Il1b/Il1rn/Lif/Il6	4
GO:0010712	BP	GO:0010712	regulation of collagen metabolic process	2/51	63/28891	0.00557011	0.0158404	0.00581159	Ccl2/Il6	2
GO:0030858	BP	GO:0030858	positive regulation of epithelial cell differentiation	2/51	63/28891	0.00557011	0.0158404	0.00581159	Fgf2/Lif	2
GO:0032655	BP	GO:0032655	regulation of interleukin-12 production	2/51	63/28891	0.00557011	0.0158404	0.00581159	Tnfsf9/Syk	2
GO:0060193	BP	GO:0060193	positive regulation of lipase activity	2/51	63/28891	0.00557011	0.0158404	0.00581159	Fgf2/Ccn1	2
GO:0006469	BP	GO:0006469	negative regulation of protein kinase activity	3/51	204/28891	0.00563114	0.0159939	0.00586787	Il1b/Tnfaip3/Il6	3
GO:0030139	CC	GO:0030139	endocytic vesicle	4/51	214/28573	0.000580334	0.0160618	0.00792046	Ccl2/Cybb/Csf3/Syk	4
GO:0019898	CC	GO:0019898	extrinsic component of membrane	4/51	227/28573	0.000723504	0.0160618	0.00792046	Socs3/Pik3r5/Fgr/Syk	4
GO:0010517	BP	GO:0010517	regulation of phospholipase activity	2/51	64/28891	0.00574334	0.0162716	0.00596976	Fgf2/Ccn1	2
GO:0046850	BP	GO:0046850	regulation of bone remodeling	2/51	64/28891	0.00574334	0.0162716	0.00596976	Il6/Syk	2
GO:0032615	BP	GO:0032615	interleukin-12 production	2/51	65/28891	0.00591901	0.0167064	0.0061293	Tnfsf9/Syk	2
GO:0032964	BP	GO:0032964	collagen biosynthetic process	2/51	65/28891	0.00591901	0.0167064	0.0061293	Ccl2/Il6	2
GO:0071622	BP	GO:0071622	regulation of granulocyte chemotaxis	2/51	65/28891	0.00591901	0.0167064	0.0061293	Il1b/Ccl2	2
GO:0045732	BP	GO:0045732	positive regulation of protein catabolic process	3/51	208/28891	0.00594127	0.0167483	0.00614466	Trim30a/Il1b/Tnfaip3	3
GO:0009914	BP	GO:0009914	hormone transport	4/51	411/28891	0.00595559	0.0167677	0.00615179	Il1b/Il1rn/Lif/Il6	4
GO:0022408	BP	GO:0022408	negative regulation of cell-cell adhesion	3/51	209/28891	0.00602038	0.016908	0.00620324	Il4ra/Il1rn/Tnfaip3	3
GO:0034767	BP	GO:0034767	positive regulation of monoatomic ion transmembrane transport	3/51	209/28891	0.00602038	0.016908	0.00620324	Cxcl10/Lcn2/Ccl2	3
GO:0051785	BP	GO:0051785	positive regulation of nuclear division	2/51	66/28891	0.00609713	0.0171023	0.00627453	Il1a/Il1b	2
GO:0043331	BP	GO:0043331	response to dsRNA	2/51	67/28891	0.00627768	0.0175651	0.00644432	Nfkbia/Ifih1	2
GO:1905517	BP	GO:1905517	macrophage migration	2/51	67/28891	0.00627768	0.0175651	0.00644432	Ccl3/Ccl2	2
GO:0000768	BP	GO:0000768	syncytium formation by plasma membrane fusion	2/51	68/28891	0.00646066	0.0180101	0.00660759	Il4ra/Cxcl10	2
GO:0002224	BP	GO:0002224	toll-like receptor signaling pathway	2/51	68/28891	0.00646066	0.0180101	0.00660759	Trim30a/Irf7	2
GO:0140253	BP	GO:0140253	cell-cell fusion	2/51	68/28891	0.00646066	0.0180101	0.00660759	Il4ra/Cxcl10	2
GO:0042277	MF	GO:0042277	peptide binding	4/51	370/28407	0.00436959	0.0183523	0.00855521	Msr1/Nfkbia/Fcgr2b/H2-Q4	4
GO:0070231	BP	GO:0070231	T cell apoptotic process	2/51	69/28891	0.00664605	0.018504	0.00678881	Fas/Bcl3	2
GO:0050678	BP	GO:0050678	regulation of epithelial cell proliferation	4/51	426/28891	0.00674592	0.018759	0.00688234	Fgf2/Ccl2/Tnfaip3/Il6	4
GO:0006801	BP	GO:0006801	superoxide metabolic process	2/51	70/28891	0.00683385	0.0187972	0.00689637	Cybb/Syk	2
GO:0006949	BP	GO:0006949	syncytium formation	2/51	70/28891	0.00683385	0.0187972	0.00689637	Il4ra/Cxcl10	2
GO:0010563	BP	GO:0010563	negative regulation of phosphorus metabolic process	4/51	430/28891	0.00696787	0.0187972	0.00689637	Socs3/Il1b/Tnfaip3/Il6	4
GO:0045936	BP	GO:0045936	negative regulation of phosphate metabolic process	4/51	430/28891	0.00696787	0.0187972	0.00689637	Socs3/Il1b/Tnfaip3/Il6	4
GO:0019730	BP	GO:0019730	antimicrobial humoral response	3/51	221/28891	0.00701916	0.0187972	0.00689637	Cxcl10/Bcl3/H2-Q4	3
GO:0060986	BP	GO:0060986	endocrine hormone secretion	2/51	71/28891	0.00702404	0.0187972	0.00689637	Il1b/Lif	2
GO:0001802	BP	GO:0001802	type III hypersensitivity	1/51	4/28891	0.00704271	0.0187972	0.00689637	Fcer1g	1
GO:0001803	BP	GO:0001803	regulation of type III hypersensitivity	1/51	4/28891	0.00704271	0.0187972	0.00689637	Fcer1g	1
GO:0001805	BP	GO:0001805	positive regulation of type III hypersensitivity	1/51	4/28891	0.00704271	0.0187972	0.00689637	Fcer1g	1
GO:0032672	BP	GO:0032672	regulation of interleukin-3 production	1/51	4/28891	0.00704271	0.0187972	0.00689637	Syk	1
GO:0033026	BP	GO:0033026	negative regulation of mast cell apoptotic process	1/51	4/28891	0.00704271	0.0187972	0.00689637	Fcer1g	1
GO:0033030	BP	GO:0033030	negative regulation of neutrophil apoptotic process	1/51	4/28891	0.00704271	0.0187972	0.00689637	Fcgr2b	1
GO:0034124	BP	GO:0034124	regulation of MyD88-dependent toll-like receptor signaling pathway	1/51	4/28891	0.00704271	0.0187972	0.00689637	Irf7	1
GO:0035684	BP	GO:0035684	helper T cell extravasation	1/51	4/28891	0.00704271	0.0187972	0.00689637	Ccl2	1
GO:0042660	BP	GO:0042660	positive regulation of cell fate specification	1/51	4/28891	0.00704271	0.0187972	0.00689637	Fgf2	1
GO:0045626	BP	GO:0045626	negative regulation of T-helper 1 cell differentiation	1/51	4/28891	0.00704271	0.0187972	0.00689637	Il4ra	1
GO:0046813	BP	GO:0046813	receptor-mediated virion attachment to host cell	1/51	4/28891	0.00704271	0.0187972	0.00689637	Icam1	1
GO:0070164	BP	GO:0070164	negative regulation of adiponectin secretion	1/51	4/28891	0.00704271	0.0187972	0.00689637	Il1b	1
GO:0070425	BP	GO:0070425	negative regulation of nucleotide-binding oligomerization domain containing signaling pathway	1/51	4/28891	0.00704271	0.0187972	0.00689637	Tnfaip3	1
GO:0070433	BP	GO:0070433	negative regulation of nucleotide-binding oligomerization domain containing 2 signaling pathway	1/51	4/28891	0.00704271	0.0187972	0.00689637	Tnfaip3	1
GO:0071724	BP	GO:0071724	response to diacyl bacterial lipopeptide	1/51	4/28891	0.00704271	0.0187972	0.00689637	Cd14	1
GO:0071726	BP	GO:0071726	cellular response to diacyl bacterial lipopeptide	1/51	4/28891	0.00704271	0.0187972	0.00689637	Cd14	1
GO:0072108	BP	GO:0072108	positive regulation of mesenchymal to epithelial transition involved in metanephros morphogenesis	1/51	4/28891	0.00704271	0.0187972	0.00689637	Lif	1
GO:0140971	NA	GO:0140971	GO:0140971	1/51	4/28891	0.00704271	0.0187972	0.00689637	Gbp2	1
GO:0160006	NA	GO:0160006	Fc receptor-mediated immune complex endocytosis	1/51	4/28891	0.00704271	0.0187972	0.00689637	Fcgr2b	1
GO:1900148	BP	GO:1900148	negative regulation of Schwann cell migration	1/51	4/28891	0.00704271	0.0187972	0.00689637	Fas	1
GO:1901740	BP	GO:1901740	negative regulation of myoblast fusion	1/51	4/28891	0.00704271	0.0187972	0.00689637	Cxcl10	1
GO:1902913	BP	GO:1902913	positive regulation of neuroepithelial cell differentiation	1/51	4/28891	0.00704271	0.0187972	0.00689637	Fgf2	1
GO:1903381	BP	GO:1903381	regulation of endoplasmic reticulum stress-induced neuron intrinsic apoptotic signaling pathway	1/51	4/28891	0.00704271	0.0187972	0.00689637	Fcgr2b	1
GO:1904849	BP	GO:1904849	positive regulation of cell chemotaxis to fibroblast growth factor	1/51	4/28891	0.00704271	0.0187972	0.00689637	Fgf2	1
GO:1990168	BP	GO:1990168	protein K33-linked deubiquitination	1/51	4/28891	0.00704271	0.0187972	0.00689637	Tnfaip3	1
GO:2000173	BP	GO:2000173	negative regulation of branching morphogenesis of a nerve	1/51	4/28891	0.00704271	0.0187972	0.00689637	Il1b	1
GO:2000546	BP	GO:2000546	positive regulation of endothelial cell chemotaxis to fibroblast growth factor	1/51	4/28891	0.00704271	0.0187972	0.00689637	Fgf2	1
GO:2000635	BP	GO:2000635	negative regulation of primary miRNA processing	1/51	4/28891	0.00704271	0.0187972	0.00689637	Il6	1
GO:0042886	BP	GO:0042886	amide transport	4/51	432/28891	0.00708065	0.0188762	0.00692533	Il1b/Il1rn/Lif/Il6	4
GO:0046890	BP	GO:0046890	regulation of lipid biosynthetic process	3/51	222/28891	0.00710656	0.0189229	0.00694248	Il1a/Ccn1/Il1b	3
GO:0051216	BP	GO:0051216	cartilage development	3/51	223/28891	0.00719461	0.0191348	0.00702022	Fgf2/Ccn1/Stc1	3
GO:0033673	BP	GO:0033673	negative regulation of kinase activity	3/51	225/28891	0.00737265	0.0195852	0.00718548	Il1b/Tnfaip3/Il6	3
GO:0002020	MF	GO:0002020	protease binding	3/51	195/28407	0.00520703	0.0199121	0.00928233	Fas/Lcn2/Tnfaip3	3
GO:0004704	MF	GO:0004704	NF-kappaB-inducing kinase activity	1/51	3/28407	0.00537652	0.0199121	0.00928233	Ikbke	1
GO:0005146	MF	GO:0005146	leukemia inhibitory factor receptor binding	1/51	3/28407	0.00537652	0.0199121	0.00928233	Lif	1
GO:0008384	MF	GO:0008384	IkappaB kinase activity	1/51	3/28407	0.00537652	0.0199121	0.00928233	Ikbke	1
GO:0019976	MF	GO:0019976	interleukin-2 binding	1/51	3/28407	0.00537652	0.0199121	0.00928233	Il2rg	1
GO:0042010	MF	GO:0042010	interleukin-15 receptor activity	1/51	3/28407	0.00537652	0.0199121	0.00928233	Il2rg	1
GO:0031593	MF	GO:0031593	polyubiquitin modification-dependent protein binding	2/51	61/28407	0.00540471	0.0199121	0.00928233	Ikbke/Tnfaip3	2
GO:0015800	BP	GO:0015800	acidic amino acid transport	2/51	74/28891	0.00760892	0.0201418	0.00738967	Il1b/Il1rn	2
GO:0035456	BP	GO:0035456	response to interferon-beta	2/51	74/28891	0.00760892	0.0201418	0.00738967	Gbp2/Ikbke	2
GO:0046640	BP	GO:0046640	regulation of alpha-beta T cell proliferation	2/51	74/28891	0.00760892	0.0201418	0.00738967	H2-Q4/Syk	2
GO:0007623	BP	GO:0007623	circadian rhythm	3/51	228/28891	0.00764459	0.0202125	0.00741562	Fas/Relb/Il6	3
GO:0061138	BP	GO:0061138	morphogenesis of a branching epithelium	3/51	229/28891	0.00773654	0.0204317	0.00749604	Socs3/Fgf2/Il6	3
GO:0010633	BP	GO:0010633	negative regulation of epithelial cell migration	2/51	75/28891	0.00780862	0.020598	0.00755704	Fgf2/Stc1	2
GO:0001649	BP	GO:0001649	osteoblast differentiation	3/51	230/28891	0.00782915	0.020628	0.00756806	Fgf2/Ccn1/Il6	3
GO:0043542	BP	GO:0043542	endothelial cell migration	3/51	231/28891	0.00792241	0.0208494	0.00764929	Fgf2/Lcn2/Stc1	3
GO:0001960	BP	GO:0001960	negative regulation of cytokine-mediated signaling pathway	2/51	76/28891	0.00801067	0.0210082	0.00770756	Il1rn/Il6	2
GO:0051926	BP	GO:0051926	negative regulation of calcium ion transport	2/51	76/28891	0.00801067	0.0210082	0.00770756	Icam1/Stc1	2
GO:1901224	BP	GO:1901224	positive regulation of NIK/NF-kappaB signaling	2/51	76/28891	0.00801067	0.0210082	0.00770756	Il1b/Eif2ak2	2
GO:1904036	BP	GO:1904036	negative regulation of epithelial cell apoptotic process	2/51	77/28891	0.00821507	0.0215193	0.00789506	Icam1/Tnfaip3	2
GO:0046777	BP	GO:0046777	protein autophosphorylation	3/51	238/28891	0.00859371	0.022485	0.00824937	Eif2ak2/Fgr/Syk	3
GO:0046633	BP	GO:0046633	alpha-beta T cell proliferation	2/51	79/28891	0.00863087	0.0225094	0.0082583	H2-Q4/Syk	2
GO:0007253	BP	GO:0007253	cytoplasmic sequestering of NF-kappaB	1/51	5/28891	0.00879578	0.0225094	0.0082583	Nfkbia	1
GO:0019062	BP	GO:0019062	virion attachment to host cell	1/51	5/28891	0.00879578	0.0225094	0.0082583	Icam1	1
GO:0032632	BP	GO:0032632	interleukin-3 production	1/51	5/28891	0.00879578	0.0225094	0.0082583	Syk	1
GO:0035523	BP	GO:0035523	protein K29-linked deubiquitination	1/51	5/28891	0.00879578	0.0225094	0.0082583	Tnfaip3	1
GO:0035702	BP	GO:0035702	monocyte homeostasis	1/51	5/28891	0.00879578	0.0225094	0.0082583	Ccl2	1
GO:0036483	BP	GO:0036483	neuron intrinsic apoptotic signaling pathway in response to endoplasmic reticulum stress	1/51	5/28891	0.00879578	0.0225094	0.0082583	Fcgr2b	1
GO:0038157	BP	GO:0038157	granulocyte-macrophage colony-stimulating factor signaling pathway	1/51	5/28891	0.00879578	0.0225094	0.0082583	Csf2rb	1
GO:0044650	BP	GO:0044650	adhesion of symbiont to host cell	1/51	5/28891	0.00879578	0.0225094	0.0082583	Icam1	1
GO:0045583	BP	GO:0045583	regulation of cytotoxic T cell differentiation	1/51	5/28891	0.00879578	0.0225094	0.0082583	Tnfsf9	1
GO:0048861	BP	GO:0048861	leukemia inhibitory factor signaling pathway	1/51	5/28891	0.00879578	0.0225094	0.0082583	Lif	1
GO:0060708	NA	GO:0060708	spongiotrophoblast differentiation	1/51	5/28891	0.00879578	0.0225094	0.0082583	Lif	1
GO:0070428	BP	GO:0070428	regulation of nucleotide-binding oligomerization domain containing 1 signaling pathway	1/51	5/28891	0.00879578	0.0225094	0.0082583	Tnfaip3	1
GO:0071226	BP	GO:0071226	cellular response to molecule of fungal origin	1/51	5/28891	0.00879578	0.0225094	0.0082583	Syk	1
GO:0071455	BP	GO:0071455	cellular response to hyperoxia	1/51	5/28891	0.00879578	0.0225094	0.0082583	Fas	1
GO:0072639	BP	GO:0072639	interleukin-33 production	1/51	5/28891	0.00879578	0.0225094	0.0082583	Il1a	1
GO:0098711	BP	GO:0098711	iron ion import across plasma membrane	1/51	5/28891	0.00879578	0.0225094	0.0082583	Lcn2	1
GO:0110091	BP	GO:0110091	negative regulation of hippocampal neuron apoptotic process	1/51	5/28891	0.00879578	0.0225094	0.0082583	Lcn2	1
GO:0002714	BP	GO:0002714	positive regulation of B cell mediated immunity	2/51	80/28891	0.00884226	0.0225094	0.0082583	Fcer1g/H2-Q4	2
GO:0002891	BP	GO:0002891	positive regulation of immunoglobulin mediated immune response	2/51	80/28891	0.00884226	0.0225094	0.0082583	Fcer1g/H2-Q4	2
GO:0032814	BP	GO:0032814	regulation of natural killer cell activation	2/51	80/28891	0.00884226	0.0225094	0.0082583	H2-Q4/Fgr	2
GO:0045123	BP	GO:0045123	cellular extravasation	2/51	80/28891	0.00884226	0.0225094	0.0082583	Icam1/Ccl2	2
GO:0060761	BP	GO:0060761	negative regulation of response to cytokine stimulus	2/51	80/28891	0.00884226	0.0225094	0.0082583	Il1rn/Il6	2
GO:1903510	BP	GO:1903510	mucopolysaccharide metabolic process	2/51	80/28891	0.00884226	0.0225094	0.0082583	Fgf2/Il1b	2
GO:0010959	BP	GO:0010959	regulation of metal ion transport	4/51	461/28891	0.00885401	0.0225139	0.00825996	Icam1/Cxcl10/Lcn2/Stc1	4
GO:0045453	BP	GO:0045453	bone resorption	2/51	81/28891	0.00905596	0.0230015	0.00843886	Il6/Syk	2
GO:0046626	BP	GO:0046626	regulation of insulin receptor signaling pathway	2/51	82/28891	0.00927196	0.0234709	0.00861108	Socs3/Il1b	2
GO:0071677	BP	GO:0071677	positive regulation of mononuclear cell migration	2/51	82/28891	0.00927196	0.0234709	0.00861108	Cxcl10/Ccl2	2
GO:2000242	BP	GO:2000242	negative regulation of reproductive process	2/51	82/28891	0.00927196	0.0234709	0.00861108	Il1a/Lif	2
GO:0045664	BP	GO:0045664	regulation of neuron differentiation	3/51	245/28891	0.00929754	0.0235094	0.00862517	Fgf2/Il1b/Il6	3
GO:0006816	BP	GO:0006816	calcium ion transport	4/51	469/28891	0.00938995	0.0237165	0.00870116	Icam1/Cxcl10/Fgf2/Stc1	4
GO:0033209	BP	GO:0033209	tumor necrosis factor-mediated signaling pathway	2/51	83/28891	0.00949025	0.023943	0.00878427	Nfkbia/Syk	2
GO:0005942	CC	GO:0005942	phosphatidylinositol 3-kinase complex	2/51	30/28573	0.00131596	0.0243453	0.0120053	Socs3/Pik3r5	2
GO:0031400	BP	GO:0031400	negative regulation of protein modification process	4/51	473/28891	0.00966571	0.0243584	0.00893669	Socs3/Il1b/Tnfaip3/Il6	4
GO:0060191	BP	GO:0060191	regulation of lipase activity	2/51	84/28891	0.00971083	0.0244449	0.0089684	Fgf2/Ccn1	2
GO:0010632	BP	GO:0010632	regulation of epithelial cell migration	3/51	250/28891	0.00982039	0.0246931	0.00905948	Fgf2/Lcn2/Stc1	3
GO:2000379	BP	GO:2000379	positive regulation of reactive oxygen species metabolic process	2/51	85/28891	0.00993369	0.0249225	0.00914364	Lcn2/Syk	2
GO:2000736	BP	GO:2000736	regulation of stem cell differentiation	2/51	85/28891	0.00993369	0.0249225	0.00914364	Fgf2/Eif2ak2	2
GO:0048545	BP	GO:0048545	response to steroid hormone	3/51	253/28891	0.0101422	0.0253892	0.00931486	Fas/Il1rn/Il6	3
GO:2001234	BP	GO:2001234	negative regulation of apoptotic signaling pathway	3/51	253/28891	0.0101422	0.0253892	0.00931486	Icam1/Il1b/Tnfaip3	3
GO:0034109	BP	GO:0034109	homotypic cell-cell adhesion	2/51	86/28891	0.0101588	0.0254027	0.0093198	Il6/Syk	2
GO:0034248	BP	GO:0034248	regulation of amide metabolic process	4/51	482/28891	0.0103054	0.0256876	0.00942435	Bcl3/Ccn1/Eif2ak2/Il6	4
GO:0034103	BP	GO:0034103	regulation of tissue remodeling	2/51	87/28891	0.0103862	0.0256876	0.00942435	Il6/Syk	2
GO:0001922	BP	GO:0001922	B-1 B cell homeostasis	1/51	6/28891	0.0105458	0.0256876	0.00942435	Tnfaip3	1
GO:0002677	BP	GO:0002677	negative regulation of chronic inflammatory response	1/51	6/28891	0.0105458	0.0256876	0.00942435	Tnfaip3	1
GO:0003278	BP	GO:0003278	apoptotic process involved in heart morphogenesis	1/51	6/28891	0.0105458	0.0256876	0.00942435	Ccn1	1
GO:0033024	BP	GO:0033024	mast cell apoptotic process	1/51	6/28891	0.0105458	0.0256876	0.00942435	Fcer1g	1
GO:0033025	BP	GO:0033025	regulation of mast cell apoptotic process	1/51	6/28891	0.0105458	0.0256876	0.00942435	Fcer1g	1
GO:0036337	BP	GO:0036337	Fas signaling pathway	1/51	6/28891	0.0105458	0.0256876	0.00942435	Fas	1
GO:0045065	BP	GO:0045065	cytotoxic T cell differentiation	1/51	6/28891	0.0105458	0.0256876	0.00942435	Tnfsf9	1
GO:0045917	BP	GO:0045917	positive regulation of complement activation	1/51	6/28891	0.0105458	0.0256876	0.00942435	Il1b	1
GO:0060129	BP	GO:0060129	thyroid-stimulating hormone-secreting cell differentiation	1/51	6/28891	0.0105458	0.0256876	0.00942435	Fgf2	1
GO:0070339	BP	GO:0070339	response to bacterial lipopeptide	1/51	6/28891	0.0105458	0.0256876	0.00942435	Cd14	1
GO:0071220	BP	GO:0071220	cellular response to bacterial lipoprotein	1/51	6/28891	0.0105458	0.0256876	0.00942435	Cd14	1
GO:0071221	BP	GO:0071221	cellular response to bacterial lipopeptide	1/51	6/28891	0.0105458	0.0256876	0.00942435	Cd14	1
GO:0071947	BP	GO:0071947	protein deubiquitination involved in ubiquitin-dependent protein catabolic process	1/51	6/28891	0.0105458	0.0256876	0.00942435	Tnfaip3	1
GO:0072257	BP	GO:0072257	metanephric nephron tubule epithelial cell differentiation	1/51	6/28891	0.0105458	0.0256876	0.00942435	Lif	1
GO:0072307	BP	GO:0072307	regulation of metanephric nephron tubule epithelial cell differentiation	1/51	6/28891	0.0105458	0.0256876	0.00942435	Lif	1
GO:0110089	BP	GO:0110089	regulation of hippocampal neuron apoptotic process	1/51	6/28891	0.0105458	0.0256876	0.00942435	Lcn2	1
GO:0140639	NA	GO:0140639	positive regulation of pyroptosis	1/51	6/28891	0.0105458	0.0256876	0.00942435	Gbp2	1
GO:0140970	NA	GO:0140970	GO:0140970	1/51	6/28891	0.0105458	0.0256876	0.00942435	Gbp2	1
GO:1902512	BP	GO:1902512	positive regulation of apoptotic DNA fragmentation	1/51	6/28891	0.0105458	0.0256876	0.00942435	Il6	1
GO:2000348	BP	GO:2000348	regulation of CD40 signaling pathway	1/51	6/28891	0.0105458	0.0256876	0.00942435	Tnfaip3	1
GO:2000427	BP	GO:2000427	positive regulation of apoptotic cell clearance	1/51	6/28891	0.0105458	0.0256876	0.00942435	Ccl2	1
GO:2000634	BP	GO:2000634	regulation of primary miRNA processing	1/51	6/28891	0.0105458	0.0256876	0.00942435	Il6	1
GO:0019770	MF	GO:0019770	IgG receptor activity	1/51	4/28407	0.00716239	0.0258259	0.0120391	Fcgr2b	1
GO:0001540	MF	GO:0001540	amyloid-beta binding	2/51	71/28407	0.00725585	0.0258259	0.0120391	Msr1/Fcgr2b	2
GO:0072088	BP	GO:0072088	nephron epithelium morphogenesis	2/51	88/28891	0.0106159	0.0258304	0.00947672	Fgf2/Lif	2
GO:0034765	BP	GO:0034765	regulation of monoatomic ion transmembrane transport	4/51	490/28891	0.0108966	0.0264849	0.00971687	Cxcl10/Lcn2/Ccl2/Cybb	4
GO:0051348	BP	GO:0051348	negative regulation of transferase activity	3/51	260/28891	0.0109168	0.0265056	0.00972444	Il1b/Tnfaip3/Il6	3
GO:0051656	BP	GO:0051656	establishment of organelle localization	4/51	491/28891	0.010972	0.026611	0.0097631	Il4ra/Fcer1g/Fgr/Syk	4
GO:0002707	BP	GO:0002707	negative regulation of lymphocyte mediated immunity	2/51	90/28891	0.0110819	0.0267911	0.00982917	Fcgr2b/H2-Q4	2
GO:0072028	BP	GO:0072028	nephron morphogenesis	2/51	90/28891	0.0110819	0.0267911	0.00982917	Fgf2/Lif	2
GO:1900076	BP	GO:1900076	regulation of cellular response to insulin stimulus	2/51	90/28891	0.0110819	0.0267911	0.00982917	Socs3/Il1b	2
GO:0044403	BP	GO:0044403	biological process involved in symbiotic interaction	3/51	264/28891	0.0113745	0.0274397	0.0100672	Icam1/Gbp2/Trim30a	3
GO:0090276	BP	GO:0090276	regulation of peptide hormone secretion	3/51	264/28891	0.0113745	0.0274397	0.0100672	Il1b/Lif/Il6	3
GO:0050709	BP	GO:0050709	negative regulation of protein secretion	2/51	92/28891	0.0115568	0.0278497	0.0102176	Il1b/Rsad2	2
GO:0030073	BP	GO:0030073	insulin secretion	3/51	266/28891	0.0116074	0.027942	0.0102514	Il1b/Il1rn/Il6	3
GO:0032273	BP	GO:0032273	positive regulation of protein polymerization	2/51	93/28891	0.0117976	0.0281799	0.0103387	Icam1/Csf3	2
GO:0002791	BP	GO:0002791	regulation of peptide secretion	3/51	269/28891	0.011962	0.0281799	0.0103387	Il1b/Lif/Il6	3
GO:0048708	BP	GO:0048708	astrocyte differentiation	2/51	94/28891	0.0120405	0.0281799	0.0103387	Il1b/Lif	2
GO:0051341	BP	GO:0051341	regulation of oxidoreductase activity	2/51	94/28891	0.0120405	0.0281799	0.0103387	Il1a/Il1b	2
GO:0031668	BP	GO:0031668	cellular response to extracellular stimulus	3/51	271/28891	0.0122018	0.0281799	0.0103387	Fas/Eif2ak2/Fos	3
GO:0090087	BP	GO:0090087	regulation of peptide transport	3/51	271/28891	0.0122018	0.0281799	0.0103387	Il1b/Lif/Il6	3
GO:0002260	BP	GO:0002260	lymphocyte homeostasis	2/51	95/28891	0.0122857	0.0281799	0.0103387	Fas/Tnfaip3	2
GO:0045670	BP	GO:0045670	regulation of osteoclast differentiation	2/51	95/28891	0.0122857	0.0281799	0.0103387	Ccl3/Fos	2
GO:0002238	BP	GO:0002238	response to molecule of fungal origin	1/51	7/28891	0.0122928	0.0281799	0.0103387	Syk	1
GO:0002248	BP	GO:0002248	connective tissue replacement involved in inflammatory response wound healing	1/51	7/28891	0.0122928	0.0281799	0.0103387	Il1a	1
GO:0002457	BP	GO:0002457	T cell antigen processing and presentation	1/51	7/28891	0.0122928	0.0281799	0.0103387	Icam1	1
GO:0002826	BP	GO:0002826	negative regulation of T-helper 1 type immune response	1/51	7/28891	0.0122928	0.0281799	0.0103387	Il4ra	1
GO:0002865	BP	GO:0002865	negative regulation of acute inflammatory response to antigenic stimulus	1/51	7/28891	0.0122928	0.0281799	0.0103387	Fcgr2b	1
GO:0010455	BP	GO:0010455	positive regulation of cell fate commitment	1/51	7/28891	0.0122928	0.0281799	0.0103387	Fgf2	1
GO:0010886	BP	GO:0010886	positive regulation of cholesterol storage	1/51	7/28891	0.0122928	0.0281799	0.0103387	Msr1	1
GO:0032493	BP	GO:0032493	response to bacterial lipoprotein	1/51	7/28891	0.0122928	0.0281799	0.0103387	Cd14	1
GO:0032831	BP	GO:0032831	positive regulation of CD4-positive, CD25-positive, alpha-beta regulatory T cell differentiation	1/51	7/28891	0.0122928	0.0281799	0.0103387	Il2rg	1
GO:0033023	BP	GO:0033023	mast cell homeostasis	1/51	7/28891	0.0122928	0.0281799	0.0103387	Fcer1g	1
GO:0034155	BP	GO:0034155	regulation of toll-like receptor 7 signaling pathway	1/51	7/28891	0.0122928	0.0281799	0.0103387	Rsad2	1
GO:0034157	BP	GO:0034157	positive regulation of toll-like receptor 7 signaling pathway	1/51	7/28891	0.0122928	0.0281799	0.0103387	Rsad2	1
GO:0034165	BP	GO:0034165	positive regulation of toll-like receptor 9 signaling pathway	1/51	7/28891	0.0122928	0.0281799	0.0103387	Rsad2	1
GO:0034242	BP	GO:0034242	negative regulation of syncytium formation by plasma membrane fusion	1/51	7/28891	0.0122928	0.0281799	0.0103387	Cxcl10	1
GO:0034759	BP	GO:0034759	regulation of iron ion transmembrane transport	1/51	7/28891	0.0122928	0.0281799	0.0103387	Lcn2	1
GO:0035766	BP	GO:0035766	cell chemotaxis to fibroblast growth factor	1/51	7/28891	0.0122928	0.0281799	0.0103387	Fgf2	1
GO:0035768	BP	GO:0035768	endothelial cell chemotaxis to fibroblast growth factor	1/51	7/28891	0.0122928	0.0281799	0.0103387	Fgf2	1
GO:0038001	BP	GO:0038001	paracrine signaling	1/51	7/28891	0.0122928	0.0281799	0.0103387	Fgf2	1
GO:0038043	BP	GO:0038043	interleukin-5-mediated signaling pathway	1/51	7/28891	0.0122928	0.0281799	0.0103387	Csf2rb	1
GO:0038113	BP	GO:0038113	interleukin-9-mediated signaling pathway	1/51	7/28891	0.0122928	0.0281799	0.0103387	Il2rg	1
GO:0042590	BP	GO:0042590	antigen processing and presentation of exogenous peptide antigen via MHC class I	1/51	7/28891	0.0122928	0.0281799	0.0103387	Fcer1g	1
GO:0046668	BP	GO:0046668	regulation of retinal cell programmed cell death	1/51	7/28891	0.0122928	0.0281799	0.0103387	Fgf2	1
GO:0051715	BP	GO:0051715	cytolysis in another organism	1/51	7/28891	0.0122928	0.0281799	0.0103387	Gbp2	1
GO:0055093	BP	GO:0055093	response to hyperoxia	1/51	7/28891	0.0122928	0.0281799	0.0103387	Fas	1
GO:0060558	BP	GO:0060558	regulation of calcidiol 1-monooxygenase activity	1/51	7/28891	0.0122928	0.0281799	0.0103387	Il1b	1
GO:0060664	BP	GO:0060664	epithelial cell proliferation involved in salivary gland morphogenesis	1/51	7/28891	0.0122928	0.0281799	0.0103387	Il6	1
GO:0060978	BP	GO:0060978	angiogenesis involved in coronary vascular morphogenesis	1/51	7/28891	0.0122928	0.0281799	0.0103387	Fgf2	1
GO:0061470	BP	GO:0061470	T follicular helper cell differentiation	1/51	7/28891	0.0122928	0.0281799	0.0103387	Il6	1
GO:0070162	BP	GO:0070162	adiponectin secretion	1/51	7/28891	0.0122928	0.0281799	0.0103387	Il1b	1
GO:0070163	BP	GO:0070163	regulation of adiponectin secretion	1/51	7/28891	0.0122928	0.0281799	0.0103387	Il1b	1
GO:0071355	BP	GO:0071355	cellular response to interleukin-9	1/51	7/28891	0.0122928	0.0281799	0.0103387	Il2rg	1
GO:0090154	BP	GO:0090154	positive regulation of sphingolipid biosynthetic process	1/51	7/28891	0.0122928	0.0281799	0.0103387	Ccn1	1
GO:0097411	BP	GO:0097411	hypoxia-inducible factor-1alpha signaling pathway	1/51	7/28891	0.0122928	0.0281799	0.0103387	Cybb	1
GO:1903626	BP	GO:1903626	positive regulation of DNA catabolic process	1/51	7/28891	0.0122928	0.0281799	0.0103387	Il6	1
GO:1904847	BP	GO:1904847	regulation of cell chemotaxis to fibroblast growth factor	1/51	7/28891	0.0122928	0.0281799	0.0103387	Fgf2	1
GO:1990349	BP	GO:1990349	gap junction-mediated intercellular transport	1/51	7/28891	0.0122928	0.0281799	0.0103387	Map3k8	1
GO:2000304	BP	GO:2000304	positive regulation of ceramide biosynthetic process	1/51	7/28891	0.0122928	0.0281799	0.0103387	Ccn1	1
GO:2000544	BP	GO:2000544	regulation of endothelial cell chemotaxis to fibroblast growth factor	1/51	7/28891	0.0122928	0.0281799	0.0103387	Fgf2	1
GO:2000698	BP	GO:2000698	positive regulation of epithelial cell differentiation involved in kidney development	1/51	7/28891	0.0122928	0.0281799	0.0103387	Lif	1
GO:0004674	MF	GO:0004674	protein serine/threonine kinase activity	4/51	441/28407	0.00805719	0.0282002	0.0131459	Map3k8/Eif2ak2/Ikbke/Syk	4
GO:0032996	CC	GO:0032996	Bcl3-Bcl10 complex	1/51	1/28573	0.0017849	0.0283034	0.0139571	Bcl3	1
GO:0001875	MF	GO:0001875	lipopolysaccharide immune receptor activity	1/51	5/28407	0.00894511	0.0293512	0.0136825	Cd14	1
GO:0019767	MF	GO:0019767	IgE receptor activity	1/51	5/28407	0.00894511	0.0293512	0.0136825	Fcer1g	1
GO:0048248	MF	GO:0048248	CXCR3 chemokine receptor binding	1/51	5/28407	0.00894511	0.0293512	0.0136825	Cxcl10	1
GO:0090722	MF	GO:0090722	receptor-receptor interaction	1/51	5/28407	0.00894511	0.0293512	0.0136825	Fgf2	1
GO:0033218	MF	GO:0033218	amide binding	4/51	457/28407	0.00910384	0.0294124	0.013711	Msr1/Nfkbia/Fcgr2b/H2-Q4	4
GO:0006835	BP	GO:0006835	dicarboxylic acid transport	2/51	98/28891	0.0130344	0.0298192	0.0109402	Il1b/Il1rn	2
GO:0045685	BP	GO:0045685	regulation of glial cell differentiation	2/51	98/28891	0.0130344	0.0298192	0.0109402	Il1b/Lif	2
GO:0003725	MF	GO:0003725	double-stranded RNA binding	2/51	82/28407	0.00957596	0.0300142	0.0139916	Ifih1/Eif2ak2	2
GO:0038024	MF	GO:0038024	cargo receptor activity	2/51	82/28407	0.00957596	0.0300142	0.0139916	Msr1/Endou	2
GO:0033002	BP	GO:0033002	muscle cell proliferation	3/51	280/28891	0.0133154	0.0304312	0.0111647	Fgf2/Tnfaip3/Il6	3
GO:0034764	BP	GO:0034764	positive regulation of transmembrane transport	3/51	282/28891	0.0135704	0.0309829	0.0113671	Cxcl10/Lcn2/Ccl2	3
GO:0004694	MF	GO:0004694	eukaryotic translation initiation factor 2alpha kinase activity	1/51	6/28407	0.0107247	0.0312834	0.0145832	Eif2ak2	1
GO:0005527	MF	GO:0005527	macrolide binding	1/51	6/28407	0.0107247	0.0312834	0.0145832	Lcn2	1
GO:0019863	MF	GO:0019863	IgE binding	1/51	6/28407	0.0107247	0.0312834	0.0145832	Fcer1g	1
GO:0140487	MF	GO:0140487	metal ion sequestering activity	1/51	6/28407	0.0107247	0.0312834	0.0145832	Lcn2	1
GO:0043621	MF	GO:0043621	protein self-association	2/51	87/28407	0.0107257	0.0312834	0.0145832	Rsad2/Tnfaip3	2
GO:0001912	BP	GO:0001912	positive regulation of leukocyte mediated cytotoxicity	2/51	101/28891	0.0138024	0.0314124	0.0115247	H2-Q4/Ccl2	2
GO:0010717	BP	GO:0010717	regulation of epithelial to mesenchymal transition	2/51	101/28891	0.0138024	0.0314124	0.0115247	Il1b/Il6	2
GO:0030203	BP	GO:0030203	glycosaminoglycan metabolic process	2/51	101/28891	0.0138024	0.0314124	0.0115247	Fgf2/Il1b	2
GO:0048863	BP	GO:0048863	stem cell differentiation	3/51	284/28891	0.0138283	0.0314124	0.0115247	Fgf2/Eif2ak2/Lif	3
GO:0001812	BP	GO:0001812	positive regulation of type I hypersensitivity	1/51	8/28891	0.0140368	0.0314124	0.0115247	Fcer1g	1
GO:0003339	BP	GO:0003339	regulation of mesenchymal to epithelial transition involved in metanephros morphogenesis	1/51	8/28891	0.0140368	0.0314124	0.0115247	Lif	1
GO:0031665	BP	GO:0031665	negative regulation of lipopolysaccharide-mediated signaling pathway	1/51	8/28891	0.0140368	0.0314124	0.0115247	Tnfaip3	1
GO:0032829	BP	GO:0032829	regulation of CD4-positive, CD25-positive, alpha-beta regulatory T cell differentiation	1/51	8/28891	0.0140368	0.0314124	0.0115247	Il2rg	1
GO:0039530	BP	GO:0039530	MDA-5 signaling pathway	1/51	8/28891	0.0140368	0.0314124	0.0115247	Ifih1	1
GO:0042940	BP	GO:0042940	D-amino acid transport	1/51	8/28891	0.0140368	0.0314124	0.0115247	Nfkbie	1
GO:0043615	BP	GO:0043615	astrocyte cell migration	1/51	8/28891	0.0140368	0.0314124	0.0115247	Ccl3	1
GO:0051461	BP	GO:0051461	positive regulation of corticotropin secretion	1/51	8/28891	0.0140368	0.0314124	0.0115247	Lif	1
GO:0070487	BP	GO:0070487	monocyte aggregation	1/51	8/28891	0.0140368	0.0314124	0.0115247	Il1b	1
GO:0071104	BP	GO:0071104	response to interleukin-9	1/51	8/28891	0.0140368	0.0314124	0.0115247	Il2rg	1
GO:0110088	BP	GO:0110088	hippocampal neuron apoptotic process	1/51	8/28891	0.0140368	0.0314124	0.0115247	Lcn2	1
GO:1903976	BP	GO:1903976	negative regulation of glial cell migration	1/51	8/28891	0.0140368	0.0314124	0.0115247	Fas	1
GO:1904783	BP	GO:1904783	positive regulation of NMDA glutamate receptor activity	1/51	8/28891	0.0140368	0.0314124	0.0115247	Ccl2	1
GO:2000425	BP	GO:2000425	regulation of apoptotic cell clearance	1/51	8/28891	0.0140368	0.0314124	0.0115247	Ccl2	1
GO:2000554	BP	GO:2000554	regulation of T-helper 1 cell cytokine production	1/51	8/28891	0.0140368	0.0314124	0.0115247	Il1b	1
GO:2000556	BP	GO:2000556	positive regulation of T-helper 1 cell cytokine production	1/51	8/28891	0.0140368	0.0314124	0.0115247	Il1b	1
GO:0002704	BP	GO:0002704	negative regulation of leukocyte mediated immunity	2/51	103/28891	0.0143252	0.0319944	0.0117382	Fcgr2b/H2-Q4	2
GO:0006661	BP	GO:0006661	phosphatidylinositol biosynthetic process	2/51	103/28891	0.0143252	0.0319944	0.0117382	Socs3/Fgf2	2
GO:0001938	BP	GO:0001938	positive regulation of endothelial cell proliferation	2/51	104/28891	0.0145898	0.0325209	0.0119314	Fgf2/Ccl2	2
GO:0140029	BP	GO:0140029	exocytic process	2/51	104/28891	0.0145898	0.0325209	0.0119314	Fcer1g/Syk	2
GO:0072080	BP	GO:0072080	nephron tubule development	2/51	105/28891	0.0148564	0.0330827	0.0121375	Fgf2/Lif	2
GO:0010001	BP	GO:0010001	glial cell differentiation	3/51	292/28891	0.0148878	0.0331199	0.0121511	Fgf2/Il1b/Lif	3
GO:0072091	BP	GO:0072091	regulation of stem cell proliferation	2/51	106/28891	0.0151252	0.0335819	0.0123206	Fgf2/Eif2ak2	2
GO:1901222	BP	GO:1901222	regulation of NIK/NF-kappaB signaling	2/51	106/28891	0.0151252	0.0335819	0.0123206	Il1b/Eif2ak2	2
GO:0003713	MF	GO:0003713	transcription coactivator activity	3/51	265/28407	0.0120219	0.0340941	0.0158935	Fgf2/Trim30a/Bcl3	3
GO:0005138	MF	GO:0005138	interleukin-6 receptor binding	1/51	7/28407	0.0125012	0.0340941	0.0158935	Il6	1
GO:0019966	MF	GO:0019966	interleukin-1 binding	1/51	7/28407	0.0125012	0.0340941	0.0158935	Il1rn	1
GO:0031727	MF	GO:0031727	CCR2 chemokine receptor binding	1/51	7/28407	0.0125012	0.0340941	0.0158935	Ccl2	1
GO:0070891	MF	GO:0070891	lipoteichoic acid binding	1/51	7/28407	0.0125012	0.0340941	0.0158935	Cd14	1
GO:0060993	BP	GO:0060993	kidney morphogenesis	2/51	107/28891	0.0153961	0.0341497	0.0125289	Fgf2/Lif	2
GO:0051924	BP	GO:0051924	regulation of calcium ion transport	3/51	296/28891	0.0154344	0.0342011	0.0125478	Icam1/Cxcl10/Stc1	3
GO:0046849	BP	GO:0046849	bone remodeling	2/51	108/28891	0.0156691	0.034223	0.0125558	Il6/Syk	2
GO:0002291	BP	GO:0002291	T cell activation via T cell receptor contact with antigen bound to MHC molecule on antigen presenting cell	1/51	9/28891	0.0157777	0.034223	0.0125558	Icam1	1
GO:0002314	BP	GO:0002314	germinal center B cell differentiation	1/51	9/28891	0.0157777	0.034223	0.0125558	Il6	1
GO:0010626	BP	GO:0010626	negative regulation of Schwann cell proliferation	1/51	9/28891	0.0157777	0.034223	0.0125558	Fas	1
GO:0019835	BP	GO:0019835	cytolysis	1/51	9/28891	0.0157777	0.034223	0.0125558	Gbp2	1
GO:0031394	BP	GO:0031394	positive regulation of prostaglandin biosynthetic process	1/51	9/28891	0.0157777	0.034223	0.0125558	Il1b	1
GO:0031622	BP	GO:0031622	positive regulation of fever generation	1/51	9/28891	0.0157777	0.034223	0.0125558	Il1b	1
GO:0032329	BP	GO:0032329	serine transport	1/51	9/28891	0.0157777	0.034223	0.0125558	Nfkbie	1
GO:0033029	BP	GO:0033029	regulation of neutrophil apoptotic process	1/51	9/28891	0.0157777	0.034223	0.0125558	Fcgr2b	1
GO:0035771	BP	GO:0035771	interleukin-4-mediated signaling pathway	1/51	9/28891	0.0157777	0.034223	0.0125558	Il4ra	1
GO:0038110	BP	GO:0038110	interleukin-2-mediated signaling pathway	1/51	9/28891	0.0157777	0.034223	0.0125558	Il2rg	1
GO:0044062	BP	GO:0044062	regulation of excretion	1/51	9/28891	0.0157777	0.034223	0.0125558	Stc1	1
GO:0051459	BP	GO:0051459	regulation of corticotropin secretion	1/51	9/28891	0.0157777	0.034223	0.0125558	Lif	1
GO:0060290	BP	GO:0060290	transdifferentiation	1/51	9/28891	0.0157777	0.034223	0.0125558	Lif	1
GO:0060462	BP	GO:0060462	lung lobe development	1/51	9/28891	0.0157777	0.034223	0.0125558	Lif	1
GO:0060463	BP	GO:0060463	lung lobe morphogenesis	1/51	9/28891	0.0157777	0.034223	0.0125558	Lif	1
GO:0070432	BP	GO:0070432	regulation of nucleotide-binding oligomerization domain containing 2 signaling pathway	1/51	9/28891	0.0157777	0.034223	0.0125558	Tnfaip3	1
GO:0097527	BP	GO:0097527	necroptotic signaling pathway	1/51	9/28891	0.0157777	0.034223	0.0125558	Fas	1
GO:1901731	BP	GO:1901731	positive regulation of platelet aggregation	1/51	9/28891	0.0157777	0.034223	0.0125558	Il6	1
GO:1905276	BP	GO:1905276	regulation of epithelial tube formation	1/51	9/28891	0.0157777	0.034223	0.0125558	Fgf2	1
GO:1905278	BP	GO:1905278	positive regulation of epithelial tube formation	1/51	9/28891	0.0157777	0.034223	0.0125558	Fgf2	1
GO:2000172	BP	GO:2000172	regulation of branching morphogenesis of a nerve	1/51	9/28891	0.0157777	0.034223	0.0125558	Il1b	1
GO:0071901	BP	GO:0071901	negative regulation of protein serine/threonine kinase activity	2/51	109/28891	0.0159442	0.0345508	0.0126761	Il1b/Tnfaip3	2
GO:0010595	BP	GO:0010595	positive regulation of endothelial cell migration	2/51	110/28891	0.0162213	0.0351176	0.012884	Fgf2/Lcn2	2
GO:0061326	BP	GO:0061326	renal tubule development	2/51	112/28891	0.0167817	0.0362961	0.0133164	Fgf2/Lif	2
GO:0008630	BP	GO:0008630	intrinsic apoptotic signaling pathway in response to DNA damage	2/51	113/28891	0.017065	0.036768	0.0134895	Bcl3/Ikbke	2
GO:0042116	BP	GO:0042116	macrophage activation	2/51	113/28891	0.017065	0.036768	0.0134895	Il4ra/Syk	2
GO:0050886	BP	GO:0050886	endocrine process	2/51	113/28891	0.017065	0.036768	0.0134895	Il1b/Lif	2
GO:0070227	BP	GO:0070227	lymphocyte apoptotic process	2/51	113/28891	0.017065	0.036768	0.0134895	Fas/Bcl3	2
GO:0002634	BP	GO:0002634	regulation of germinal center formation	1/51	10/28891	0.0175157	0.0369285	0.0135484	Tnfaip3	1
GO:0002924	BP	GO:0002924	negative regulation of humoral immune response mediated by circulating immunoglobulin	1/51	10/28891	0.0175157	0.0369285	0.0135484	Fcgr2b	1
GO:0010496	BP	GO:0010496	intercellular transport	1/51	10/28891	0.0175157	0.0369285	0.0135484	Map3k8	1
GO:0010745	BP	GO:0010745	negative regulation of macrophage derived foam cell differentiation	1/51	10/28891	0.0175157	0.0369285	0.0135484	Nfkbia	1
GO:0031666	BP	GO:0031666	positive regulation of lipopolysaccharide-mediated signaling pathway	1/51	10/28891	0.0175157	0.0369285	0.0135484	Cd14	1
GO:0033212	BP	GO:0033212	iron import into cell	1/51	10/28891	0.0175157	0.0369285	0.0135484	Lcn2	1
GO:0034163	BP	GO:0034163	regulation of toll-like receptor 9 signaling pathway	1/51	10/28891	0.0175157	0.0369285	0.0135484	Rsad2	1
GO:0035723	BP	GO:0035723	interleukin-15-mediated signaling pathway	1/51	10/28891	0.0175157	0.0369285	0.0135484	Il2rg	1
GO:0035871	BP	GO:0035871	protein K11-linked deubiquitination	1/51	10/28891	0.0175157	0.0369285	0.0135484	Tnfaip3	1
GO:0043551	BP	GO:0043551	regulation of phosphatidylinositol 3-kinase activity	1/51	10/28891	0.0175157	0.0369285	0.0135484	Pik3r5	1
GO:0046666	BP	GO:0046666	retinal cell programmed cell death	1/51	10/28891	0.0175157	0.0369285	0.0135484	Fgf2	1
GO:0060710	BP	GO:0060710	chorio-allantoic fusion	1/51	10/28891	0.0175157	0.0369285	0.0135484	Ccn1	1
GO:0070091	BP	GO:0070091	glucagon secretion	1/51	10/28891	0.0175157	0.0369285	0.0135484	Il6	1
GO:0070092	BP	GO:0070092	regulation of glucagon secretion	1/51	10/28891	0.0175157	0.0369285	0.0135484	Il6	1
GO:0070391	BP	GO:0070391	response to lipoteichoic acid	1/51	10/28891	0.0175157	0.0369285	0.0135484	Cd14	1
GO:0071223	BP	GO:0071223	cellular response to lipoteichoic acid	1/51	10/28891	0.0175157	0.0369285	0.0135484	Cd14	1
GO:0071350	BP	GO:0071350	cellular response to interleukin-15	1/51	10/28891	0.0175157	0.0369285	0.0135484	Il2rg	1
GO:0071352	BP	GO:0071352	cellular response to interleukin-2	1/51	10/28891	0.0175157	0.0369285	0.0135484	Il2rg	1
GO:0090091	BP	GO:0090091	positive regulation of extracellular matrix disassembly	1/51	10/28891	0.0175157	0.0369285	0.0135484	Il6	1
GO:1902746	BP	GO:1902746	regulation of lens fiber cell differentiation	1/51	10/28891	0.0175157	0.0369285	0.0135484	Fgf2	1
GO:1903596	BP	GO:1903596	regulation of gap junction assembly	1/51	10/28891	0.0175157	0.0369285	0.0135484	Il1b	1
GO:1903799	BP	GO:1903799	negative regulation of miRNA maturation	1/51	10/28891	0.0175157	0.0369285	0.0135484	Il6	1
GO:2001269	BP	GO:2001269	positive regulation of cysteine-type endopeptidase activity involved in apoptotic signaling pathway	1/51	10/28891	0.0175157	0.0369285	0.0135484	Fas	1
GO:0006022	BP	GO:0006022	aminoglycan metabolic process	2/51	115/28891	0.0176378	0.0371166	0.0136174	Fgf2/Il1b	2
GO:0048661	BP	GO:0048661	positive regulation of smooth muscle cell proliferation	2/51	115/28891	0.0176378	0.0371166	0.0136174	Fgf2/Il6	2
GO:0005031	MF	GO:0005031	tumor necrosis factor receptor activity	1/51	8/28407	0.0142745	0.0379448	0.0176886	Fas	1
GO:0030292	MF	GO:0030292	protein tyrosine kinase inhibitor activity	1/51	8/28407	0.0142745	0.0379448	0.0176886	Socs3	1
GO:0007162	BP	GO:0007162	negative regulation of cell adhesion	3/51	315/28891	0.018185	0.0382325	0.0140268	Il4ra/Il1rn/Tnfaip3	3
GO:0015844	BP	GO:0015844	monoamine transport	2/51	117/28891	0.0182186	0.0382676	0.0140397	Fcer1g/Syk	2
GO:0061448	BP	GO:0061448	connective tissue development	3/51	316/28891	0.0183368	0.0384801	0.0141177	Fgf2/Ccn1/Stc1	3
GO:0048511	BP	GO:0048511	rhythmic process	3/51	317/28891	0.0184894	0.0387642	0.0142219	Fas/Relb/Il6	3
GO:0045666	BP	GO:0045666	positive regulation of neuron differentiation	2/51	118/28891	0.0185121	0.0387757	0.0142261	Fgf2/Il6	2
GO:0007088	BP	GO:0007088	regulation of mitotic nuclear division	2/51	119/28891	0.0188075	0.0393581	0.0144398	Il1a/Il1b	2
GO:0033256	CC	GO:0033256	I-kappaB/NF-kappaB complex	1/51	2/28573	0.00356668	0.039383	0.0194207	Bcl3	1
GO:0033257	CC	GO:0033257	Bcl3/NF-kappaB2 complex	1/51	2/28573	0.00356668	0.039383	0.0194207	Bcl3	1
GO:0036398	CC	GO:0036398	TCR signalosome	1/51	2/28573	0.00356668	0.039383	0.0194207	Lcp2	1
GO:0009898	CC	GO:0009898	cytoplasmic side of plasma membrane	3/51	180/28573	0.00410093	0.039383	0.0194207	Socs3/Fgr/Syk	3
GO:0005896	CC	GO:0005896	interleukin-6 receptor complex	1/51	3/28573	0.00534534	0.039383	0.0194207	Il6	1
GO:0033001	CC	GO:0033001	Fc-gamma receptor III complex	1/51	3/28573	0.00534534	0.039383	0.0194207	Fcer1g	1
GO:0071682	CC	GO:0071682	endocytic vesicle lumen	1/51	3/28573	0.00534534	0.039383	0.0194207	Csf3	1
GO:0098802	CC	GO:0098802	plasma membrane signaling receptor complex	3/51	198/28573	0.00534535	0.039383	0.0194207	Csf2rb/Il6/Syk	3
GO:0098562	CC	GO:0098562	cytoplasmic side of membrane	3/51	212/28573	0.00645434	0.039383	0.0194207	Socs3/Fgr/Syk	3
GO:0005944	CC	GO:0005944	phosphatidylinositol 3-kinase complex, class IB	1/51	4/28573	0.00712089	0.039383	0.0194207	Pik3r5	1
GO:0044299	CC	GO:0044299	C-fiber	1/51	4/28573	0.00712089	0.039383	0.0194207	Ccl2	1
GO:0031234	CC	GO:0031234	extrinsic component of cytoplasmic side of plasma membrane	2/51	74/28573	0.00777224	0.039383	0.0194207	Fgr/Syk	2
GO:0030526	CC	GO:0030526	granulocyte macrophage colony-stimulating factor receptor complex	1/51	5/28573	0.00889333	0.039383	0.0194207	Csf2rb	1
GO:0031265	CC	GO:0031265	CD95 death-inducing signaling complex	1/51	5/28573	0.00889333	0.039383	0.0194207	Fas	1
GO:0035976	CC	GO:0035976	transcription factor AP-1 complex	1/51	5/28573	0.00889333	0.039383	0.0194207	Fos	1
GO:1990111	CC	GO:1990111	spermatoproteasome complex	1/51	5/28573	0.00889333	0.039383	0.0194207	Psmb8	1
GO:0032998	CC	GO:0032998	Fc-epsilon receptor I complex	1/51	6/28573	0.0106627	0.039383	0.0194207	Fcer1g	1
GO:0046696	CC	GO:0046696	lipopolysaccharide receptor complex	1/51	6/28573	0.0106627	0.039383	0.0194207	Cd14	1
GO:0018995	CC	GO:0018995	host cellular component	1/51	7/28573	0.0124289	0.039383	0.0194207	Gbp2	1
GO:0020003	NA	GO:0020003	symbiont-containing vacuole	1/51	7/28573	0.0124289	0.039383	0.0194207	Gbp2	1
GO:0020005	NA	GO:0020005	symbiont-containing vacuole membrane	1/51	7/28573	0.0124289	0.039383	0.0194207	Gbp2	1
GO:0030430	NA	GO:0030430	host cell cytoplasm	1/51	7/28573	0.0124289	0.039383	0.0194207	Gbp2	1
GO:0031264	CC	GO:0031264	death-inducing signaling complex	1/51	7/28573	0.0124289	0.039383	0.0194207	Fas	1
GO:0033643	NA	GO:0033643	host cell part	1/51	7/28573	0.0124289	0.039383	0.0194207	Gbp2	1
GO:0033646	NA	GO:0033646	host intracellular part	1/51	7/28573	0.0124289	0.039383	0.0194207	Gbp2	1
GO:0033655	NA	GO:0033655	host cell cytoplasm part	1/51	7/28573	0.0124289	0.039383	0.0194207	Gbp2	1
GO:0043656	NA	GO:0043656	host intracellular region	1/51	7/28573	0.0124289	0.039383	0.0194207	Gbp2	1
GO:0043657	CC	GO:0043657	host cell	1/51	7/28573	0.0124289	0.039383	0.0194207	Gbp2	1
GO:0005943	CC	GO:0005943	phosphatidylinositol 3-kinase complex, class IA	1/51	8/28573	0.0141921	0.039383	0.0194207	Pik3r5	1
GO:0019815	CC	GO:0019815	B cell receptor complex	1/51	8/28573	0.0141921	0.039383	0.0194207	Syk	1
GO:0032997	CC	GO:0032997	Fc receptor complex	1/51	8/28573	0.0141921	0.039383	0.0194207	Fcer1g	1
GO:0097651	CC	GO:0097651	phosphatidylinositol 3-kinase complex, class I	1/51	8/28573	0.0141921	0.039383	0.0194207	Pik3r5	1
GO:0106139	CC	GO:0106139	symbiont cell surface	1/51	8/28573	0.0141921	0.039383	0.0194207	Gbp2	1
GO:0010038	BP	GO:0010038	response to metal ion	3/51	320/28891	0.0189513	0.0396223	0.0145368	Fas/Il1a/Fos	3
GO:0072009	BP	GO:0072009	nephron epithelium development	2/51	120/28891	0.019105	0.0396496	0.0145467	Fgf2/Lif	2
GO:0002246	BP	GO:0002246	wound healing involved in inflammatory response	1/51	11/28891	0.0192506	0.0396496	0.0145467	Il1a	1
GO:0002676	BP	GO:0002676	regulation of chronic inflammatory response	1/51	11/28891	0.0192506	0.0396496	0.0145467	Tnfaip3	1
GO:0003337	BP	GO:0003337	mesenchymal to epithelial transition involved in metanephros morphogenesis	1/51	11/28891	0.0192506	0.0396496	0.0145467	Lif	1
GO:0021940	BP	GO:0021940	positive regulation of cerebellar granule cell precursor proliferation	1/51	11/28891	0.0192506	0.0396496	0.0145467	Fgf2	1
GO:0031620	BP	GO:0031620	regulation of fever generation	1/51	11/28891	0.0192506	0.0396496	0.0145467	Il1b	1
GO:0032815	BP	GO:0032815	negative regulation of natural killer cell activation	1/51	11/28891	0.0192506	0.0396496	0.0145467	Fgr	1
GO:0035744	BP	GO:0035744	T-helper 1 cell cytokine production	1/51	11/28891	0.0192506	0.0396496	0.0145467	Il1b	1
GO:0042118	BP	GO:0042118	endothelial cell activation	1/51	11/28891	0.0192506	0.0396496	0.0145467	Cxcl10	1
GO:0051458	BP	GO:0051458	corticotropin secretion	1/51	11/28891	0.0192506	0.0396496	0.0145467	Lif	1
GO:0070424	BP	GO:0070424	regulation of nucleotide-binding oligomerization domain containing signaling pathway	1/51	11/28891	0.0192506	0.0396496	0.0145467	Tnfaip3	1
GO:0070672	BP	GO:0070672	response to interleukin-15	1/51	11/28891	0.0192506	0.0396496	0.0145467	Il2rg	1
GO:0071864	BP	GO:0071864	positive regulation of cell proliferation in bone marrow	1/51	11/28891	0.0192506	0.0396496	0.0145467	Il6	1
GO:0090237	BP	GO:0090237	regulation of arachidonic acid secretion	1/51	11/28891	0.0192506	0.0396496	0.0145467	Syk	1
GO:1900147	BP	GO:1900147	regulation of Schwann cell migration	1/51	11/28891	0.0192506	0.0396496	0.0145467	Fas	1
GO:2001280	BP	GO:2001280	positive regulation of unsaturated fatty acid biosynthetic process	1/51	11/28891	0.0192506	0.0396496	0.0145467	Il1b	1
GO:0030198	BP	GO:0030198	extracellular matrix organization	3/51	322/28891	0.0192629	0.0396496	0.0145467	Bcl3/Ccn1/Il6	3
GO:0030301	BP	GO:0030301	cholesterol transport	2/51	121/28891	0.0194044	0.0398996	0.0146385	Msr1/Nfkbia	2
GO:0045229	BP	GO:0045229	external encapsulating structure organization	3/51	323/28891	0.0194197	0.0398996	0.0146385	Bcl3/Ccn1/Il6	3
GO:0043062	BP	GO:0043062	extracellular structure organization	3/51	324/28891	0.0195772	0.0401502	0.0147304	Bcl3/Ccn1/Il6	3
GO:0070482	BP	GO:0070482	response to oxygen levels	3/51	324/28891	0.0195772	0.0401502	0.0147304	Fas/Lif/Cybb	3
GO:0032963	BP	GO:0032963	collagen metabolic process	2/51	123/28891	0.0200092	0.0409617	0.0150281	Ccl2/Il6	2
GO:0051952	BP	GO:0051952	regulation of amine transport	2/51	123/28891	0.0200092	0.0409617	0.0150281	Il1b/Il1rn	2
GO:0097193	BP	GO:0097193	intrinsic apoptotic signaling pathway	3/51	327/28891	0.0200541	0.0410165	0.0150483	Bcl3/Fcgr2b/Ikbke	3
GO:0004298	MF	GO:0004298	threonine-type endopeptidase activity	1/51	9/28407	0.0160447	0.04109	0.0191548	Psmb8	1
GO:0016175	MF	GO:0016175	superoxide-generating NAD(P)H oxidase activity	1/51	9/28407	0.0160447	0.04109	0.0191548	Cybb	1
GO:0034988	MF	GO:0034988	Fc-gamma receptor I complex binding	1/51	9/28407	0.0160447	0.04109	0.0191548	Fgr	1
GO:0010631	BP	GO:0010631	epithelial cell migration	3/51	328/28891	0.0202145	0.0413072	0.0151549	Fgf2/Lcn2/Stc1	3
GO:0015918	BP	GO:0015918	sterol transport	2/51	124/28891	0.0203145	0.041474	0.0152161	Msr1/Nfkbia	2
GO:0090132	BP	GO:0090132	epithelium migration	3/51	330/28891	0.0205375	0.0416699	0.0152879	Fgf2/Lcn2/Stc1	3
GO:0007611	BP	GO:0007611	learning or memory	3/51	331/28891	0.0207	0.0416699	0.0152879	Lcn2/Il1b/Il1rn	3
GO:0090130	BP	GO:0090130	tissue migration	3/51	332/28891	0.0208632	0.0416699	0.0152879	Fgf2/Lcn2/Stc1	3
GO:0002361	BP	GO:0002361	CD4-positive, CD25-positive, alpha-beta regulatory T cell differentiation	1/51	12/28891	0.0209826	0.0416699	0.0152879	Il2rg	1
GO:0010624	BP	GO:0010624	regulation of Schwann cell proliferation	1/51	12/28891	0.0209826	0.0416699	0.0152879	Fas	1
GO:0010764	BP	GO:0010764	negative regulation of fibroblast migration	1/51	12/28891	0.0209826	0.0416699	0.0152879	Fgf2	1
GO:0014842	BP	GO:0014842	regulation of skeletal muscle satellite cell proliferation	1/51	12/28891	0.0209826	0.0416699	0.0152879	Fgf2	1
GO:0031392	BP	GO:0031392	regulation of prostaglandin biosynthetic process	1/51	12/28891	0.0209826	0.0416699	0.0152879	Il1b	1
GO:0033089	BP	GO:0033089	positive regulation of T cell differentiation in thymus	1/51	12/28891	0.0209826	0.0416699	0.0152879	Il2rg	1
GO:0034139	BP	GO:0034139	regulation of toll-like receptor 3 signaling pathway	1/51	12/28891	0.0209826	0.0416699	0.0152879	Tnfaip3	1
GO:0034154	BP	GO:0034154	toll-like receptor 7 signaling pathway	1/51	12/28891	0.0209826	0.0416699	0.0152879	Rsad2	1
GO:0036135	BP	GO:0036135	Schwann cell migration	1/51	12/28891	0.0209826	0.0416699	0.0152879	Fas	1
GO:0036295	BP	GO:0036295	cellular response to increased oxygen levels	1/51	12/28891	0.0209826	0.0416699	0.0152879	Fas	1
GO:0038063	BP	GO:0038063	collagen-activated tyrosine kinase receptor signaling pathway	1/51	12/28891	0.0209826	0.0416699	0.0152879	Syk	1
GO:0042994	BP	GO:0042994	cytoplasmic sequestering of transcription factor	1/51	12/28891	0.0209826	0.0416699	0.0152879	Nfkbia	1
GO:0043313	BP	GO:0043313	regulation of neutrophil degranulation	1/51	12/28891	0.0209826	0.0416699	0.0152879	Syk	1
GO:0045588	BP	GO:0045588	positive regulation of gamma-delta T cell differentiation	1/51	12/28891	0.0209826	0.0416699	0.0152879	Syk	1
GO:0045607	BP	GO:0045607	regulation of inner ear auditory receptor cell differentiation	1/51	12/28891	0.0209826	0.0416699	0.0152879	Fgf2	1
GO:0045631	BP	GO:0045631	regulation of mechanoreceptor differentiation	1/51	12/28891	0.0209826	0.0416699	0.0152879	Fgf2	1
GO:0045835	BP	GO:0045835	negative regulation of meiotic nuclear division	1/51	12/28891	0.0209826	0.0416699	0.0152879	Lif	1
GO:0046645	BP	GO:0046645	positive regulation of gamma-delta T cell activation	1/51	12/28891	0.0209826	0.0416699	0.0152879	Syk	1
GO:0051971	BP	GO:0051971	positive regulation of transmission of nerve impulse	1/51	12/28891	0.0209826	0.0416699	0.0152879	Il6	1
GO:0060426	BP	GO:0060426	lung vasculature development	1/51	12/28891	0.0209826	0.0416699	0.0152879	Lif	1
GO:0060536	BP	GO:0060536	cartilage morphogenesis	1/51	12/28891	0.0209826	0.0416699	0.0152879	Stc1	1
GO:0060965	BP	GO:0060965	negative regulation of miRNA-mediated gene silencing	1/51	12/28891	0.0209826	0.0416699	0.0152879	Il6	1
GO:0070669	BP	GO:0070669	response to interleukin-2	1/51	12/28891	0.0209826	0.0416699	0.0152879	Il2rg	1
GO:0072182	BP	GO:0072182	regulation of nephron tubule epithelial cell differentiation	1/51	12/28891	0.0209826	0.0416699	0.0152879	Lif	1
GO:0097400	BP	GO:0097400	interleukin-17-mediated signaling pathway	1/51	12/28891	0.0209826	0.0416699	0.0152879	Ikbke	1
GO:1901678	BP	GO:1901678	iron coordination entity transport	1/51	12/28891	0.0209826	0.0416699	0.0152879	Lcn2	1
GO:2000303	BP	GO:2000303	regulation of ceramide biosynthetic process	1/51	12/28891	0.0209826	0.0416699	0.0152879	Ccn1	1
GO:2000980	BP	GO:2000980	regulation of inner ear receptor cell differentiation	1/51	12/28891	0.0209826	0.0416699	0.0152879	Fgf2	1
GO:0048534	BP	GO:0048534	hematopoietic or lymphoid organ development	2/51	127/28891	0.0212423	0.0421486	0.0154636	Fas/Bcl3	2
GO:0071496	BP	GO:0071496	cellular response to external stimulus	3/51	335/28891	0.0213572	0.0423394	0.0155336	Fas/Eif2ak2/Fos	3
GO:0061041	BP	GO:0061041	regulation of wound healing	2/51	128/28891	0.0215555	0.0426949	0.015664	Fgf2/Ccl2	2
GO:0046883	BP	GO:0046883	regulation of hormone secretion	3/51	337/28891	0.0216901	0.042924	0.0157481	Il1b/Lif/Il6	3
GO:0044217	CC	GO:0044217	other organism part	1/51	9/28573	0.0159521	0.0431874	0.0212968	Gbp2	1
GO:1904035	BP	GO:1904035	regulation of epithelial cell apoptotic process	2/51	129/28891	0.0218705	0.0432431	0.0158651	Icam1/Tnfaip3	2
GO:0045824	BP	GO:0045824	negative regulation of innate immune response	2/51	130/28891	0.0221875	0.0437932	0.016067	H2-Q4/Tnfaip3	2
GO:0071675	BP	GO:0071675	regulation of mononuclear cell migration	2/51	130/28891	0.0221875	0.0437932	0.016067	Cxcl10/Ccl2	2
GO:1902074	BP	GO:1902074	response to salt	3/51	343/28891	0.022706	0.0439439	0.0161223	Fas/Il1b/Fos	3
GO:0002223	BP	GO:0002223	stimulatory C-type lectin receptor signaling pathway	1/51	13/28891	0.0227115	0.0439439	0.0161223	Syk	1
GO:0002756	BP	GO:0002756	MyD88-independent toll-like receptor signaling pathway	1/51	13/28891	0.0227115	0.0439439	0.0161223	Irf7	1
GO:0010225	BP	GO:0010225	response to UV-C	1/51	13/28891	0.0227115	0.0439439	0.0161223	Bcl3	1
GO:0014010	BP	GO:0014010	Schwann cell proliferation	1/51	13/28891	0.0227115	0.0439439	0.0161223	Fas	1
GO:0019370	BP	GO:0019370	leukotriene biosynthetic process	1/51	13/28891	0.0227115	0.0439439	0.0161223	Syk	1
GO:0031652	BP	GO:0031652	positive regulation of heat generation	1/51	13/28891	0.0227115	0.0439439	0.0161223	Il1b	1
GO:0033689	BP	GO:0033689	negative regulation of osteoblast proliferation	1/51	13/28891	0.0227115	0.0439439	0.0161223	Eif2ak2	1
GO:0034116	BP	GO:0034116	positive regulation of heterotypic cell-cell adhesion	1/51	13/28891	0.0227115	0.0439439	0.0161223	Il1b	1
GO:0034756	BP	GO:0034756	regulation of iron ion transport	1/51	13/28891	0.0227115	0.0439439	0.0161223	Lcn2	1
GO:0042532	BP	GO:0042532	negative regulation of tyrosine phosphorylation of STAT protein	1/51	13/28891	0.0227115	0.0439439	0.0161223	Socs3	1
GO:0045625	BP	GO:0045625	regulation of T-helper 1 cell differentiation	1/51	13/28891	0.0227115	0.0439439	0.0161223	Il4ra	1
GO:0051712	BP	GO:0051712	positive regulation of killing of cells of another organism	1/51	13/28891	0.0227115	0.0439439	0.0161223	Syk	1
GO:0060149	BP	GO:0060149	negative regulation of post-transcriptional gene silencing	1/51	13/28891	0.0227115	0.0439439	0.0161223	Il6	1
GO:0060967	BP	GO:0060967	negative regulation of gene silencing by RNA	1/51	13/28891	0.0227115	0.0439439	0.0161223	Il6	1
GO:0071863	BP	GO:0071863	regulation of cell proliferation in bone marrow	1/51	13/28891	0.0227115	0.0439439	0.0161223	Il6	1
GO:0072540	BP	GO:0072540	T-helper 17 cell lineage commitment	1/51	13/28891	0.0227115	0.0439439	0.0161223	Il6	1
GO:0090557	BP	GO:0090557	establishment of endothelial intestinal barrier	1/51	13/28891	0.0227115	0.0439439	0.0161223	Icam1	1
GO:0097421	BP	GO:0097421	liver regeneration	1/51	13/28891	0.0227115	0.0439439	0.0161223	Il6	1
GO:1900369	BP	GO:1900369	negative regulation of post-transcriptional gene silencing by RNA	1/51	13/28891	0.0227115	0.0439439	0.0161223	Il6	1
GO:1902510	BP	GO:1902510	regulation of apoptotic DNA fragmentation	1/51	13/28891	0.0227115	0.0439439	0.0161223	Il6	1
GO:1990840	BP	GO:1990840	response to lectin	1/51	13/28891	0.0227115	0.0439439	0.0161223	Syk	1
GO:1990858	BP	GO:1990858	cellular response to lectin	1/51	13/28891	0.0227115	0.0439439	0.0161223	Syk	1
GO:0015837	BP	GO:0015837	amine transport	2/51	133/28891	0.0231499	0.0447539	0.0164194	Il1b/Il1rn	2
GO:0051222	BP	GO:0051222	positive regulation of protein transport	3/51	346/28891	0.0232236	0.0448578	0.0164576	Il1a/Ccl2/Il6	3
GO:0036435	MF	GO:0036435	K48-linked polyubiquitin modification-dependent protein binding	1/51	10/28407	0.0178118	0.0450659	0.0210082	Ikbke	1
GO:0050878	BP	GO:0050878	regulation of body fluid levels	3/51	348/28891	0.0235722	0.0454923	0.0166903	Fcer1g/Il6/Syk	3
GO:0009895	BP	GO:0009895	negative regulation of catabolic process	3/51	349/28891	0.0237476	0.0457526	0.0167858	Il1b/Ikbke/Tnfaip3	3
GO:0031331	BP	GO:0031331	positive regulation of cellular catabolic process	3/51	349/28891	0.0237476	0.0457526	0.0167858	Trim30a/Il1b/Il6	3
GO:0001910	BP	GO:0001910	regulation of leukocyte mediated cytotoxicity	2/51	136/28891	0.0241294	0.0461016	0.0169139	H2-Q4/Ccl2	2
GO:0051209	BP	GO:0051209	release of sequestered calcium ion into cytosol	2/51	136/28891	0.0241294	0.0461016	0.0169139	Cxcl10/Fgf2	2
GO:0002755	BP	GO:0002755	MyD88-dependent toll-like receptor signaling pathway	1/51	14/28891	0.0244374	0.0461016	0.0169139	Irf7	1
GO:0006924	BP	GO:0006924	activation-induced cell death of T cells	1/51	14/28891	0.0244374	0.0461016	0.0169139	Fas	1
GO:0021936	BP	GO:0021936	regulation of cerebellar granule cell precursor proliferation	1/51	14/28891	0.0244374	0.0461016	0.0169139	Fgf2	1
GO:0032717	BP	GO:0032717	negative regulation of interleukin-8 production	1/51	14/28891	0.0244374	0.0461016	0.0169139	Bcl3	1
GO:0034145	BP	GO:0034145	positive regulation of toll-like receptor 4 signaling pathway	1/51	14/28891	0.0244374	0.0461016	0.0169139	Cd14	1
GO:0036296	BP	GO:0036296	response to increased oxygen levels	1/51	14/28891	0.0244374	0.0461016	0.0169139	Fas	1
GO:0045060	BP	GO:0045060	negative thymic T cell selection	1/51	14/28891	0.0244374	0.0461016	0.0169139	Fas	1
GO:0046598	BP	GO:0046598	positive regulation of viral entry into host cell	1/51	14/28891	0.0244374	0.0461016	0.0169139	Trim30a	1
GO:0048635	BP	GO:0048635	negative regulation of muscle organ development	1/51	14/28891	0.0244374	0.0461016	0.0169139	Il6	1
GO:0060670	BP	GO:0060670	branching involved in labyrinthine layer morphogenesis	1/51	14/28891	0.0244374	0.0461016	0.0169139	Socs3	1
GO:0072160	BP	GO:0072160	nephron tubule epithelial cell differentiation	1/51	14/28891	0.0244374	0.0461016	0.0169139	Lif	1
GO:0072283	BP	GO:0072283	metanephric renal vesicle morphogenesis	1/51	14/28891	0.0244374	0.0461016	0.0169139	Lif	1
GO:0075294	BP	GO:0075294	positive regulation by symbiont of entry into host	1/51	14/28891	0.0244374	0.0461016	0.0169139	Trim30a	1
GO:0090153	BP	GO:0090153	regulation of sphingolipid biosynthetic process	1/51	14/28891	0.0244374	0.0461016	0.0169139	Ccn1	1
GO:0097709	BP	GO:0097709	connective tissue replacement	1/51	14/28891	0.0244374	0.0461016	0.0169139	Il1a	1
GO:1902036	BP	GO:1902036	regulation of hematopoietic stem cell differentiation	1/51	14/28891	0.0244374	0.0461016	0.0169139	Eif2ak2	1
GO:1903025	BP	GO:1903025	regulation of RNA polymerase II regulatory region sequence-specific DNA binding	1/51	14/28891	0.0244374	0.0461016	0.0169139	Lif	1
GO:1905038	BP	GO:1905038	regulation of membrane lipid metabolic process	1/51	14/28891	0.0244374	0.0461016	0.0169139	Ccn1	1
GO:2000347	BP	GO:2000347	positive regulation of hepatocyte proliferation	1/51	14/28891	0.0244374	0.0461016	0.0169139	Tnfaip3	1
GO:2001279	BP	GO:2001279	regulation of unsaturated fatty acid biosynthetic process	1/51	14/28891	0.0244374	0.0461016	0.0169139	Il1b	1
GO:0008286	BP	GO:0008286	insulin receptor signaling pathway	2/51	137/28891	0.0244596	0.0461016	0.0169139	Socs3/Il1b	2
GO:0030282	BP	GO:0030282	bone mineralization	2/51	137/28891	0.0244596	0.0461016	0.0169139	Ccn1/Fgr	2
GO:0051283	BP	GO:0051283	negative regulation of sequestering of calcium ion	2/51	137/28891	0.0244596	0.0461016	0.0169139	Cxcl10/Fgf2	2
GO:2000177	BP	GO:2000177	regulation of neural precursor cell proliferation	2/51	137/28891	0.0244596	0.0461016	0.0169139	Fgf2/Il1b	2
GO:0019774	CC	GO:0019774	proteasome core complex, beta-subunit complex	1/51	10/28573	0.0177091	0.0464838	0.0229223	Psmb8	1
GO:0045335	CC	GO:0045335	phagocytic vesicle	2/51	115/28573	0.0180072	0.0464838	0.0229223	Cybb/Syk	2
GO:0051282	BP	GO:0051282	regulation of sequestering of calcium ion	2/51	139/28891	0.0251256	0.0473174	0.0173599	Cxcl10/Fgf2	2
GO:0001889	BP	GO:0001889	liver development	2/51	140/28891	0.0254614	0.0478699	0.0175627	Tnfaip3/Il6	2
GO:0030101	BP	GO:0030101	natural killer cell activation	2/51	140/28891	0.0254614	0.0478699	0.0175627	H2-Q4/Fgr	2
GO:0034451	CC	GO:0034451	centriolar satellite	2/51	119/28573	0.0192005	0.0480088	0.0236743	Il4ra/Pik3r5	2
GO:1990462	CC	GO:1990462	omegasome	1/51	11/28573	0.019463	0.0480088	0.0236743	Trim30a	1
GO:0045727	BP	GO:0045727	positive regulation of translation	2/51	141/28891	0.025799	0.0480245	0.0176194	Bcl3/Il6	2
GO:0051208	BP	GO:0051208	sequestering of calcium ion	2/51	141/28891	0.025799	0.0480245	0.0176194	Cxcl10/Fgf2	2
GO:1904951	BP	GO:1904951	positive regulation of establishment of protein localization	3/51	362/28891	0.0260925	0.0480245	0.0176194	Il1a/Ccl2/Il6	3
GO:0030177	BP	GO:0030177	positive regulation of Wnt signaling pathway	2/51	142/28891	0.0261385	0.0480245	0.0176194	Fgf2/Tnfaip3	2
GO:0072089	BP	GO:0072089	stem cell proliferation	2/51	142/28891	0.0261385	0.0480245	0.0176194	Fgf2/Eif2ak2	2
GO:0001886	BP	GO:0001886	endothelial cell morphogenesis	1/51	15/28891	0.0261604	0.0480245	0.0176194	Stc1	1
GO:0002638	BP	GO:0002638	negative regulation of immunoglobulin production	1/51	15/28891	0.0261604	0.0480245	0.0176194	Fcgr2b	1
GO:0002674	BP	GO:0002674	negative regulation of acute inflammatory response	1/51	15/28891	0.0261604	0.0480245	0.0176194	Fcgr2b	1
GO:0002713	BP	GO:0002713	negative regulation of B cell mediated immunity	1/51	15/28891	0.0261604	0.0480245	0.0176194	Fcgr2b	1
GO:0002890	BP	GO:0002890	negative regulation of immunoglobulin mediated immune response	1/51	15/28891	0.0261604	0.0480245	0.0176194	Fcgr2b	1
GO:0010744	BP	GO:0010744	positive regulation of macrophage derived foam cell differentiation	1/51	15/28891	0.0261604	0.0480245	0.0176194	Msr1	1
GO:0010819	BP	GO:0010819	regulation of T cell chemotaxis	1/51	15/28891	0.0261604	0.0480245	0.0176194	Cxcl10	1
GO:0030213	BP	GO:0030213	hyaluronan biosynthetic process	1/51	15/28891	0.0261604	0.0480245	0.0176194	Il1b	1
GO:0033690	BP	GO:0033690	positive regulation of osteoblast proliferation	1/51	15/28891	0.0261604	0.0480245	0.0176194	Ccn1	1
GO:0034112	BP	GO:0034112	positive regulation of homotypic cell-cell adhesion	1/51	15/28891	0.0261604	0.0480245	0.0176194	Il6	1
GO:0035729	BP	GO:0035729	cellular response to hepatocyte growth factor stimulus	1/51	15/28891	0.0261604	0.0480245	0.0176194	Il6	1
GO:0038094	BP	GO:0038094	Fc-gamma receptor signaling pathway	1/51	15/28891	0.0261604	0.0480245	0.0176194	Fcer1g	1
GO:0043383	BP	GO:0043383	negative T cell selection	1/51	15/28891	0.0261604	0.0480245	0.0176194	Fas	1
GO:0045188	BP	GO:0045188	regulation of circadian sleep/wake cycle, non-REM sleep	1/51	15/28891	0.0261604	0.0480245	0.0176194	Il6	1
GO:0045586	BP	GO:0045586	regulation of gamma-delta T cell differentiation	1/51	15/28891	0.0261604	0.0480245	0.0176194	Syk	1
GO:0045651	BP	GO:0045651	positive regulation of macrophage differentiation	1/51	15/28891	0.0261604	0.0480245	0.0176194	Lif	1
GO:0046643	BP	GO:0046643	regulation of gamma-delta T cell activation	1/51	15/28891	0.0261604	0.0480245	0.0176194	Syk	1
GO:0048755	BP	GO:0048755	branching morphogenesis of a nerve	1/51	15/28891	0.0261604	0.0480245	0.0176194	Il1b	1
GO:0051709	BP	GO:0051709	regulation of killing of cells of another organism	1/51	15/28891	0.0261604	0.0480245	0.0176194	Syk	1
GO:0071285	BP	GO:0071285	cellular response to lithium ion	1/51	15/28891	0.0261604	0.0480245	0.0176194	Fas	1
GO:0071838	BP	GO:0071838	cell proliferation in bone marrow	1/51	15/28891	0.0261604	0.0480245	0.0176194	Il6	1
GO:1900226	BP	GO:1900226	negative regulation of NLRP3 inflammasome complex assembly	1/51	15/28891	0.0261604	0.0480245	0.0176194	Trim30a	1
GO:1903624	BP	GO:1903624	regulation of DNA catabolic process	1/51	15/28891	0.0261604	0.0480245	0.0176194	Il6	1
GO:2000343	BP	GO:2000343	positive regulation of chemokine (C-X-C motif) ligand 2 production	1/51	15/28891	0.0261604	0.0480245	0.0176194	Ccn1	1
GO:0005035	MF	GO:0005035	death receptor activity	1/51	11/28407	0.0195757	0.0483636	0.0225454	Fas	1
GO:0062061	MF	GO:0062061	TAP complex binding	1/51	11/28407	0.0195757	0.0483636	0.0225454	H2-Q4	1
GO:0061008	BP	GO:0061008	hepaticobiliary system development	2/51	143/28891	0.0264797	0.0485713	0.01782	Tnfaip3/Il6	2
GO:0030278	BP	GO:0030278	regulation of ossification	2/51	144/28891	0.0268228	0.0491607	0.0180362	Ccn1/Rsad2	2
GO:0035270	BP	GO:0035270	endocrine system development	2/51	145/28891	0.0271678	0.0497525	0.0182533	Fgf2/Il6	2

## Sheet: Table S2
	category	subcategory	ID	Description	GeneRatio	BgRatio	pvalue	p.adjust	qvalue	geneID	Count
mmu04668	Environmental Information Processing	Signal transduction	mmu04668	TNF signaling pathway - Mus musculus (house mouse)	11/38	115/9467	4.77591e-13	5.92213e-11	3.16718e-11	12051/20296/15945/14102/14281/15894/16878/26410/18035/12702/21929	11
mmu05164	Human Diseases	Infectious disease: viral	mmu05164	Influenza A - Mus musculus (house mouse)	11/38	173/9467	4.33068e-11	1.83704e-09	9.82455e-10	20296/15945/19106/14102/15894/71586/56489/54123/18035/58185/12702	11
mmu05169	Human Diseases	Infectious disease: viral	mmu05169	Epstein-Barr virus infection - Mus musculus (house mouse)	12/38	228/9467	4.44444e-11	1.83704e-09	9.82455e-10	15945/19106/14102/15015/15894/56489/54123/18035/18037/19698/20963/21929	12
mmu05162	Human Diseases	Infectious disease: viral	mmu05162	Measles - Mus musculus (house mouse)	10/38	145/9467	1.70453e-10	5.28404e-09	2.82593e-09	19106/14102/14130/14281/71586/56489/16186/54123/18035/21929	10
mmu05167	Human Diseases	Infectious disease: viral	mmu05167	Kaposi sarcoma-associated herpesvirus infection - Mus musculus (house mouse)	11/38	221/9467	6.05396e-10	1.50138e-08	8.02946e-09	19106/14102/14173/14281/15015/15894/56489/54123/18035/320207/20963	11
mmu04657	Organismal Systems	Immune system	mmu04657	IL-17 signaling pathway - Mus musculus (house mouse)	8/38	93/9467	2.45411e-09	5.07182e-08	2.71243e-08	20296/12985/15945/14281/56489/16819/18035/21929	8
mmu05171	Human Diseases	Infectious disease: viral	mmu05171	Coronavirus disease - COVID-19 - Mus musculus (house mouse)	10/38	249/9467	3.27202e-08	5.79615e-07	3.09981e-07	20296/12985/15945/13058/19106/14281/71586/56489/18035/20963	10
mmu05417	Human Diseases	Cardiovascular disease	mmu05417	Lipid and atherosclerosis - Mus musculus (house mouse)	9/38	216/9467	1.30177e-07	1.94235e-06	1.03878e-06	20296/12475/13058/14102/14281/15894/56489/54123/18035	9
mmu04620	Organismal Systems	Immune system	mmu04620	Toll-like receptor signaling pathway - Mus musculus (house mouse)	7/38	104/9467	1.503e-07	1.94235e-06	1.03878e-06	12475/15945/14281/56489/54123/26410/18035	7
mmu04060	Environmental Information Processing	Signaling molecules and interaction	mmu04060	Cytokine-cytokine receptor interaction - Mus musculus (house mouse)	10/38	294/9467	1.56641e-07	1.94235e-06	1.03878e-06	20296/12983/12985/15945/14102/16164/16186/16190/16878/21949	10
mmu05160	Human Diseases	Infectious disease: viral	mmu05160	Hepatitis C - Mus musculus (house mouse)	8/38	166/9467	2.35933e-07	2.65961e-06	1.42237e-06	15945/19106/14102/56489/54123/18035/58185/12702	8
mmu04380	Organismal Systems	Development and regeneration	mmu04380	Osteoclast differentiation - Mus musculus (house mouse)	7/38	135/9467	8.95597e-07	9.2545e-06	4.94935e-06	14130/14281/16822/18035/19698/12702/20963	7
mmu04064	Environmental Information Processing	Signal transduction	mmu04064	NF-kappa B signaling pathway - Mus musculus (house mouse)	6/38	105/9467	3.33731e-06	3.18328e-05	1.70243e-05	12475/15894/18035/19698/20963/21929	6
mmu04630	Environmental Information Processing	Signal transduction	mmu04630	JAK-STAT signaling pathway - Mus musculus (house mouse)	7/38	171/9467	4.36715e-06	3.86804e-05	2.06865e-05	12983/12985/16164/16186/16190/16878/12702	7
mmu04625	Organismal Systems	Immune system	mmu04625	C-type lectin receptor signaling pathway - Mus musculus (house mouse)	6/38	112/9467	4.86105e-06	4.01847e-05	2.14909e-05	12051/14127/56489/18035/19698/20963	6
mmu05168	Human Diseases	Infectious disease: viral	mmu05168	Herpes simplex virus 1 infection - Mus musculus (house mouse)	10/38	456/9467	8.51905e-06	6.21397e-05	3.32326e-05	20296/19106/14102/15015/71586/56489/54123/18035/12702/20963	10
mmu04622	Organismal Systems	Immune system	mmu04622	RIG-I-like receptor signaling pathway - Mus musculus (house mouse)	5/38	71/9467	8.51916e-06	6.21397e-05	3.32326e-05	15945/71586/56489/54123/18035	5
mmu04662	Organismal Systems	Immune system	mmu04662	B cell receptor signaling pathway - Mus musculus (house mouse)	5/38	83/9467	1.83454e-05	0.00012638	6.75884e-05	14130/14281/18035/18037/20963	5
mmu04621	Organismal Systems	Immune system	mmu04621	NOD-like receptor signaling pathway - Mus musculus (house mouse)	7/38	216/9467	2.0192e-05	0.000131779	7.04761e-05	20296/13058/14469/56489/54123/18035/21929	7
mmu04658	Organismal Systems	Immune system	mmu04658	Th1 and Th2 cell differentiation - Mus musculus (house mouse)	5/38	88/9467	2.43955e-05	0.000151252	8.08903e-05	14281/16186/16190/18035/18037	5
mmu05161	Human Diseases	Infectious disease: viral	mmu05161	Hepatitis B - Mus musculus (house mouse)	6/38	163/9467	4.15639e-05	0.000245425	0.000131254	14102/14281/71586/56489/54123/18035	6
mmu04659	Organismal Systems	Immune system	mmu04659	Th17 cell differentiation - Mus musculus (house mouse)	5/38	105/9467	5.72263e-05	0.000322548	0.0001725	14281/16186/16190/18035/18037	5
mmu04650	Organismal Systems	Immune system	mmu04650	Natural killer cell mediated cytotoxicity - Mus musculus (house mouse)	5/38	122/9467	0.000116916	0.000604065	0.000323057	14102/14127/15894/16822/20963	5
mmu04660	Organismal Systems	Immune system	mmu04660	T cell receptor signaling pathway - Mus musculus (house mouse)	5/38	122/9467	0.000116916	0.000604065	0.000323057	14281/16822/26410/18035/18037	5
mmu04623	Organismal Systems	Immune system	mmu04623	Cytosolic DNA-sensing pathway - Mus musculus (house mouse)	4/38	82/9467	0.000308467	0.00153	0.00081825	15945/56489/54123/18035	4
mmu05166	Human Diseases	Infectious disease: viral	mmu05166	Human T-cell leukemia virus 1 infection - Mus musculus (house mouse)	6/38	247/9467	0.000406575	0.00193905	0.00103701	14281/15015/15894/16186/18035/19698	6
mmu04145	Cellular Processes	Transport and catabolism	mmu04145	Phagosome - Mus musculus (house mouse)	5/38	179/9467	0.000691585	0.00317617	0.00169863	12475/13058/14130/15015/20288	5
mmu05142	Human Diseases	Infectious disease: parasitic	mmu05142	Chagas disease - Mus musculus (house mouse)	4/38	103/9467	0.000734151	0.00325124	0.00173878	20296/14102/14281/18035	4
mmu04062	Organismal Systems	Immune system	mmu04062	Chemokine signaling pathway - Mus musculus (house mouse)	5/38	192/9467	0.000949122	0.00405832	0.00217041	20296/15945/14191/18035/320207	5
mmu04010	Environmental Information Processing	Signal transduction	mmu04010	MAPK signaling pathway - Mus musculus (house mouse)	6/38	301/9467	0.00114976	0.00475234	0.00254157	12475/14102/14173/14281/26410/19698	6
mmu05144	Human Diseases	Infectious disease: parasitic	mmu05144	Malaria - Mus musculus (house mouse)	3/38	57/9467	0.0015035	0.00585475	0.00313115	20296/12985/15894	3
mmu04611	Organismal Systems	Immune system	mmu04611	Platelet activation - Mus musculus (house mouse)	4/38	125/9467	0.0015109	0.00585475	0.00313115	14127/16822/320207/20963	4
mmu05203	Human Diseases	Cancer: overview	mmu05203	Viral carcinogenesis - Mus musculus (house mouse)	5/38	226/9467	0.00195811	0.00729693	0.00390243	19106/15015/54123/18035/20963	5
mmu05135	Human Diseases	Infectious disease: bacterial	mmu05135	Yersinia infection - Mus musculus (house mouse)	4/38	135/9467	0.00200477	0.00729693	0.00390243	20296/14281/16822/18035	4
mmu04210	Cellular Processes	Cell growth and death	mmu04210	Apoptosis - Mus musculus (house mouse)	4/38	136/9467	0.00205962	0.00729693	0.00390243	12983/14102/14281/18035	4
mmu04664	Organismal Systems	Immune system	mmu04664	Fc epsilon RI signaling pathway - Mus musculus (house mouse)	3/38	66/9467	0.00229365	0.00787411	0.00421111	14127/16822/20963	3
mmu04936	Human Diseases	Endocrine and metabolic disease	mmu04936	Alcoholic liver disease - Mus musculus (house mouse)	4/38	141/9467	0.00234953	0.00787411	0.00421111	12475/14102/56489/18035	4
mmu05140	Human Diseases	Infectious disease: parasitic	mmu05140	Leishmaniasis - Mus musculus (house mouse)	3/38	70/9467	0.00271365	0.00885506	0.00473573	13058/14281/18035	3
mmu04920	Organismal Systems	Endocrine system	mmu04920	Adipocytokine signaling pathway - Mus musculus (house mouse)	3/38	72/9467	0.0029403	0.00934864	0.0049997	18035/18037/12702	3
mmu04151	Environmental Information Processing	Signal transduction	mmu04151	PI3K-Akt signaling pathway - Mus musculus (house mouse)	6/38	364/9467	0.00301689	0.00935236	0.00500168	12985/14173/16186/16190/320207/20963	6
mmu05323	Human Diseases	Immune disease	mmu05323	Rheumatoid arthritis - Mus musculus (house mouse)	3/38	87/9467	0.00501411	0.0149285	0.00798382	20296/14281/15894	3
mmu04217	Cellular Processes	Cell growth and death	mmu04217	Necroptosis - Mus musculus (house mouse)	4/38	175/9467	0.00510114	0.0149285	0.00798382	13058/19106/14102/21929	4
mmu05235	Human Diseases	Cancer: overview	mmu05235	PD-L1 expression and PD-1 checkpoint pathway in cancer - Mus musculus (house mouse)	3/38	88/9467	0.00517681	0.0149285	0.00798382	14281/18035/18037	3
mmu05152	Human Diseases	Infectious disease: bacterial	mmu05152	Tuberculosis - Mus musculus (house mouse)	4/38	180/9467	0.00563403	0.0158777	0.00849148	12475/14127/14130/20963	4
mmu04640	Organismal Systems	Immune system	mmu04640	Hematopoietic cell lineage - Mus musculus (house mouse)	3/38	94/9467	0.00622002	0.0171396	0.00916634	12475/12985/16190	3
mmu04061	Environmental Information Processing	Signaling molecules and interaction	mmu04061	Viral protein interaction with cytokine and cytokine receptor - Mus musculus (house mouse)	3/38	95/9467	0.00640521	0.0172662	0.00923405	20296/15945/16186	3
mmu04933	Human Diseases	Endocrine and metabolic disease	mmu04933	AGE-RAGE signaling pathway in diabetic complications - Mus musculus (house mouse)	3/38	101/9467	0.00758565	0.0200132	0.0107032	20296/13058/15894	3
mmu05143	Human Diseases	Infectious disease: parasitic	mmu05143	African trypanosomiasis - Mus musculus (house mouse)	2/38	39/9467	0.0105878	0.0273518	0.0146279	14102/15894	2
mmu05170	Human Diseases	Infectious disease: viral	mmu05170	Human immunodeficiency virus 1 infection - Mus musculus (house mouse)	4/38	237/9467	0.0145089	0.0367163	0.0196361	14102/14281/15015/18035	4
mmu05163	Human Diseases	Infectious disease: viral	mmu05163	Human cytomegalovirus infection - Mus musculus (house mouse)	4/38	253/9467	0.0180321	0.0447197	0.0239163	20296/14102/15015/18035	4

## Sheet: Table S3
#node1	node2	node1_string_id	node2_string_id	neighborhood_on_chromosome	gene_fusion	phylogenetic_cooccurrence	homology	coexpression	experimentally_determined_interaction	database_annotated	automated_textmining	combined_score
Fcer1g	Syk	10090.ENSMUSP00000078875	10090.ENSMUSP00000113852	0	0	0	0	0.175	0.861	0.9	0.997	0.999
Il13ra1	Il4ra	10090.ENSMUSP00000033418	10090.ENSMUSP00000033004	0	0	0.275	0	0.103	0.326	0.8	0.997	0.999
Il1a	Il1b	10090.ENSMUSP00000028882	10090.ENSMUSP00000028881	0	0	0	0	0.946	0	0.9	0.996	0.999
Il2rg	Il4ra	10090.ENSMUSP00000033664	10090.ENSMUSP00000033004	0	0	0	0	0.104	0.138	0.9	0.995	0.999
Lcp2	Syk	10090.ENSMUSP00000056621	10090.ENSMUSP00000113852	0	0	0	0	0.184	0.196	0.9	0.992	0.999
Ccl3	Ccl4	10090.ENSMUSP00000001008	10090.ENSMUSP00000019074	0	0	0.054	0.955	0.975	0	0	0.787	0.994
Csf3	Il1b	10090.ENSMUSP00000037762	10090.ENSMUSP00000028881	0	0	0	0	0.264	0	0	0.986	0.989
Ccl2	Ccl4	10090.ENSMUSP00000000193	10090.ENSMUSP00000019074	0	0	0.073	0.868	0.322	0.942	0	0.673	0.986
Ikbke	Irf7	10090.ENSMUSP00000054126	10090.ENSMUSP00000026571	0	0	0	0	0.14	0.168	0.9	0.815	0.985
Csf3	Il1a	10090.ENSMUSP00000037762	10090.ENSMUSP00000028882	0	0	0	0	0.251	0	0	0.98	0.984
Il1b	Il6	10090.ENSMUSP00000028881	10090.ENSMUSP00000026845	0	0	0	0	0.527	0	0	0.966	0.983
Nfkbie	Relb	10090.ENSMUSP00000024742	10090.ENSMUSP00000092355	0	0	0	0	0.569	0.65	0	0.892	0.982
Nfkbia	Nfkbie	10090.ENSMUSP00000021413	10090.ENSMUSP00000024742	0	0	0.147	0.747	0.224	0.063	0.9	0.731	0.98
Nfkbia	Relb	10090.ENSMUSP00000021413	10090.ENSMUSP00000092355	0	0	0	0	0.201	0.65	0	0.926	0.977
Ccl4	Cxcl10	10090.ENSMUSP00000019074	10090.ENSMUSP00000047646	0	0	0	0	0.522	0.132	0.5	0.9	0.976
Ccl2	Il6	10090.ENSMUSP00000000193	10090.ENSMUSP00000026845	0	0	0	0	0.6	0	0	0.941	0.975
Csf3	Il6	10090.ENSMUSP00000037762	10090.ENSMUSP00000026845	0	0	0	0	0.428	0	0	0.945	0.967
Ccl3	Cxcl10	10090.ENSMUSP00000001008	10090.ENSMUSP00000047646	0	0	0	0	0.446	0.132	0	0.935	0.966
Eif2ak2	Ifih1	10090.ENSMUSP00000024884	10090.ENSMUSP00000028259	0	0	0	0	0.569	0.084	0	0.895	0.955
Ccl2	Cxcl10	10090.ENSMUSP00000000193	10090.ENSMUSP00000047646	0	0	0	0	0.506	0.132	0	0.901	0.953
Ccl2	Icam1	10090.ENSMUSP00000000193	10090.ENSMUSP00000083587	0	0	0	0	0.345	0	0	0.923	0.947
Csf3	Fgf2	10090.ENSMUSP00000037762	10090.ENSMUSP00000143094	0	0	0	0	0.078	0.051	0	0.944	0.947
Il1a	Il6	10090.ENSMUSP00000028882	10090.ENSMUSP00000026845	0	0	0	0	0.35	0	0	0.921	0.947
Ifih1	Rsad2	10090.ENSMUSP00000028259	10090.ENSMUSP00000020970	0	0	0	0	0.788	0	0	0.748	0.944
Ifih1	Irf7	10090.ENSMUSP00000028259	10090.ENSMUSP00000026571	0	0	0	0	0.589	0.099	0	0.856	0.942
Cxcl10	Il1a	10090.ENSMUSP00000047646	10090.ENSMUSP00000028882	0	0	0	0	0.23	0	0	0.927	0.941
Eif2ak2	Rsad2	10090.ENSMUSP00000024884	10090.ENSMUSP00000020970	0	0	0	0	0.758	0	0	0.76	0.939
Ccl2	Il1b	10090.ENSMUSP00000000193	10090.ENSMUSP00000028881	0	0	0	0	0.325	0	0	0.912	0.938
Ccl3	Il1b	10090.ENSMUSP00000001008	10090.ENSMUSP00000028881	0	0	0	0	0.426	0	0	0.894	0.936
Il4ra	Il6	10090.ENSMUSP00000033004	10090.ENSMUSP00000026845	0	0	0	0	0.202	0	0.65	0.775	0.931
Irf7	Rsad2	10090.ENSMUSP00000026571	10090.ENSMUSP00000020970	0	0	0	0	0.641	0.292	0	0.749	0.93
Il6	Socs3	10090.ENSMUSP00000026845	10090.ENSMUSP00000059129	0	0	0	0	0.242	0	0.5	0.823	0.927
Il1a	Il1rn	10090.ENSMUSP00000028882	10090.ENSMUSP00000110126	0	0	0	0	0.22	0	0	0.906	0.924
Bcl3	Relb	10090.ENSMUSP00000113851	10090.ENSMUSP00000092355	0	0	0	0	0.387	0.18	0	0.857	0.922
Cxcl10	Il6	10090.ENSMUSP00000047646	10090.ENSMUSP00000026845	0	0	0	0	0.305	0	0	0.893	0.922
Fgr	Pik3r5	10090.ENSMUSP00000030693	10090.ENSMUSP00000021283	0	0	0	0	0.177	0	0.9	0.133	0.922
Ccl3	Il6	10090.ENSMUSP00000001008	10090.ENSMUSP00000026845	0	0	0	0	0.221	0	0	0.9	0.919
Ccl4	Il1b	10090.ENSMUSP00000019074	10090.ENSMUSP00000028881	0	0	0	0	0.4	0	0	0.867	0.917
Cxcl10	Il1b	10090.ENSMUSP00000047646	10090.ENSMUSP00000028881	0	0	0	0	0.271	0	0	0.888	0.915
Il2rg	Il6	10090.ENSMUSP00000033664	10090.ENSMUSP00000026845	0	0	0	0	0.116	0	0.65	0.747	0.914
Ccl3	Il1a	10090.ENSMUSP00000001008	10090.ENSMUSP00000028882	0	0	0	0	0.358	0	0	0.868	0.912
Icam1	Il1b	10090.ENSMUSP00000083587	10090.ENSMUSP00000028881	0	0	0	0	0.335	0	0	0.872	0.911
Il1b	Nfkbia	10090.ENSMUSP00000028881	10090.ENSMUSP00000021413	0	0	0	0	0.326	0	0	0.873	0.911
Icam1	Il6	10090.ENSMUSP00000083587	10090.ENSMUSP00000026845	0	0	0	0	0.187	0	0	0.892	0.908
Ccl2	Il1a	10090.ENSMUSP00000000193	10090.ENSMUSP00000028882	0	0	0	0	0.2	0	0	0.886	0.905
Ccl3	Csf3	10090.ENSMUSP00000001008	10090.ENSMUSP00000037762	0	0	0	0	0.084	0	0	0.899	0.904
Ccl4	Il6	10090.ENSMUSP00000019074	10090.ENSMUSP00000026845	0	0	0	0	0.213	0	0	0.874	0.897
Cxcl10	Ifih1	10090.ENSMUSP00000047646	10090.ENSMUSP00000028259	0	0	0	0	0.492	0	0	0.789	0.888
Il6	Nfkbia	10090.ENSMUSP00000026845	10090.ENSMUSP00000021413	0	0	0	0	0.171	0.041	0	0.869	0.887
Ccl4	Il1a	10090.ENSMUSP00000019074	10090.ENSMUSP00000028882	0	0	0	0	0.27	0	0	0.848	0.885
Fcgr2b	Syk	10090.ENSMUSP00000027966	10090.ENSMUSP00000113852	0	0	0	0	0.187	0.239	0.5	0.668	0.883
Ifih1	Ikbke	10090.ENSMUSP00000028259	10090.ENSMUSP00000054126	0	0	0	0	0.156	0.093	0	0.857	0.881
Eif2ak2	Irf7	10090.ENSMUSP00000024884	10090.ENSMUSP00000026571	0	0	0	0	0.379	0.057	0	0.811	0.879
Ccl4	Csf3	10090.ENSMUSP00000019074	10090.ENSMUSP00000037762	0	0	0	0	0.114	0	0	0.856	0.866
Csf2rb	Il6	10090.ENSMUSP00000154836	10090.ENSMUSP00000026845	0	0	0	0	0.107	0	0.65	0.608	0.866
Il1b	Socs3	10090.ENSMUSP00000028881	10090.ENSMUSP00000059129	0	0	0	0	0.437	0	0	0.772	0.866
Nfkbia	Tnfaip3	10090.ENSMUSP00000021413	10090.ENSMUSP00000019997	0	0	0	0	0.501	0.058	0	0.738	0.866
Ccl2	Ccrl2	10090.ENSMUSP00000000193	10090.ENSMUSP00000107519	0	0	0	0	0.11	0	0	0.855	0.865
Ccl2	Csf3	10090.ENSMUSP00000000193	10090.ENSMUSP00000037762	0	0	0	0	0.191	0	0	0.84	0.865
Csf3	Socs3	10090.ENSMUSP00000037762	10090.ENSMUSP00000059129	0	0	0	0	0.139	0	0.5	0.704	0.861
Cxcl10	Rsad2	10090.ENSMUSP00000047646	10090.ENSMUSP00000020970	0	0	0	0	0.463	0	0	0.748	0.859
Gbp2	Ifih1	10090.ENSMUSP00000132435	10090.ENSMUSP00000028259	0	0	0	0	0.586	0.222	0	0.598	0.859
Fcer1g	Lcp2	10090.ENSMUSP00000078875	10090.ENSMUSP00000056621	0	0	0	0	0.246	0	0.5	0.643	0.853
Csf3	Cxcl10	10090.ENSMUSP00000037762	10090.ENSMUSP00000047646	0	0	0	0	0.106	0	0	0.841	0.851
Csf3	Il4ra	10090.ENSMUSP00000037762	10090.ENSMUSP00000033004	0	0	0	0	0.118	0	0.65	0.553	0.85
Cxcl10	Irf7	10090.ENSMUSP00000047646	10090.ENSMUSP00000026571	0	0	0	0	0.465	0	0	0.728	0.848
Ccl2	Ccl3	10090.ENSMUSP00000000193	10090.ENSMUSP00000001008	0	0	0.082	0.852	0.366	0.649	0	0.335	0.846
Fos	Il6	10090.ENSMUSP00000021674	10090.ENSMUSP00000026845	0	0	0	0	0.098	0	0	0.836	0.846
Cxcl10	Icam1	10090.ENSMUSP00000047646	10090.ENSMUSP00000083587	0	0	0	0	0.332	0	0	0.756	0.83
Fgf2	Lif	10090.ENSMUSP00000143094	10090.ENSMUSP00000067066	0	0	0	0	0.182	0	0	0.801	0.83
Fos	Il1b	10090.ENSMUSP00000021674	10090.ENSMUSP00000028881	0	0	0	0	0.126	0	0	0.811	0.828
Il6	Irf7	10090.ENSMUSP00000026845	10090.ENSMUSP00000026571	0	0	0	0	0.142	0.051	0	0.8	0.823
Csf2rb	Il2rg	10090.ENSMUSP00000154836	10090.ENSMUSP00000033664	0	0	0	0.571	0.216	0	0.4	0.642	0.816
Il1rn	Il6	10090.ENSMUSP00000110126	10090.ENSMUSP00000026845	0	0	0	0	0.191	0	0	0.782	0.816
Irf7	Trim30a	10090.ENSMUSP00000026571	10090.ENSMUSP00000076189	0	0	0	0	0.57	0.06	0	0.577	0.814
Icam1	Nfkbia	10090.ENSMUSP00000083587	10090.ENSMUSP00000021413	0	0	0	0	0.368	0	0	0.709	0.808
Ccl2	Il1rn	10090.ENSMUSP00000000193	10090.ENSMUSP00000110126	0	0	0	0	0.313	0	0	0.731	0.807
Il2rg	Lif	10090.ENSMUSP00000033664	10090.ENSMUSP00000067066	0	0	0	0	0	0	0.65	0.473	0.807
Csf2rb	Lif	10090.ENSMUSP00000154836	10090.ENSMUSP00000067066	0	0	0	0	0.052	0	0.65	0.45	0.801
Il6	Lif	10090.ENSMUSP00000026845	10090.ENSMUSP00000067066	0	0	0	0	0.16	0	0	0.771	0.8
Il1b	Tnfaip3	10090.ENSMUSP00000028881	10090.ENSMUSP00000019997	0	0	0	0	0.39	0.292	0	0.569	0.798
Cd14	Il1b	10090.ENSMUSP00000056669	10090.ENSMUSP00000028881	0	0	0	0	0.312	0	0	0.715	0.796
Il13ra1	Il6	10090.ENSMUSP00000033418	10090.ENSMUSP00000026845	0	0	0	0	0.061	0	0.65	0.431	0.796
Fgf2	Il6	10090.ENSMUSP00000143094	10090.ENSMUSP00000026845	0	0	0	0	0.105	0	0	0.78	0.795
Il1b	Lcn2	10090.ENSMUSP00000028881	10090.ENSMUSP00000053962	0	0	0	0	0.183	0	0	0.752	0.788
Cxcl10	Gbp2	10090.ENSMUSP00000047646	10090.ENSMUSP00000132435	0	0	0	0	0.6	0	0	0.49	0.787
Gbp2	Psmb8	10090.ENSMUSP00000132435	10090.ENSMUSP00000025196	0	0	0	0	0.579	0	0	0.511	0.785
Csf2rb	Csf3	10090.ENSMUSP00000154836	10090.ENSMUSP00000037762	0	0	0	0	0.047	0	0.65	0.403	0.783
Csf3	Il2rg	10090.ENSMUSP00000037762	10090.ENSMUSP00000033664	0	0	0	0	0.041	0	0.65	0.392	0.778
Bcl3	Socs3	10090.ENSMUSP00000113851	10090.ENSMUSP00000059129	0	0	0	0	0.576	0.054	0	0.49	0.777
Cd14	Il6	10090.ENSMUSP00000056669	10090.ENSMUSP00000026845	0	0	0	0	0.145	0	0	0.745	0.773
Fgf2	Il1b	10090.ENSMUSP00000143094	10090.ENSMUSP00000028881	0	0	0	0	0.072	0	0	0.766	0.773
Ccl2	Socs3	10090.ENSMUSP00000000193	10090.ENSMUSP00000059129	0	0	0	0	0.191	0	0	0.73	0.772
Ikbke	Tnfaip3	10090.ENSMUSP00000054126	10090.ENSMUSP00000019997	0	0	0	0	0.142	0.196	0.5	0.412	0.77
Il2rg	Syk	10090.ENSMUSP00000033664	10090.ENSMUSP00000113852	0	0	0	0	0.189	0.094	0.5	0.442	0.767
Fas	Fcgr2b	10090.ENSMUSP00000025691	10090.ENSMUSP00000027966	0	0	0	0	0.117	0	0	0.745	0.765
Cybb	Il1b	10090.ENSMUSP00000015484	10090.ENSMUSP00000028881	0	0	0	0	0.199	0	0	0.713	0.761
Il4ra	Socs3	10090.ENSMUSP00000033004	10090.ENSMUSP00000059129	0	0	0	0	0.231	0.073	0	0.69	0.76
Icam1	Il1a	10090.ENSMUSP00000083587	10090.ENSMUSP00000028882	0	0	0	0	0.203	0	0	0.709	0.759
Fgf2	Icam1	10090.ENSMUSP00000143094	10090.ENSMUSP00000083587	0	0	0	0	0.079	0	0	0.748	0.758
Ccl3	Icam1	10090.ENSMUSP00000001008	10090.ENSMUSP00000083587	0	0	0	0	0.201	0	0	0.706	0.755
Fcer1g	Fcgr2b	10090.ENSMUSP00000078875	10090.ENSMUSP00000027966	0	0	0	0	0.22	0	0	0.698	0.754
Ccl2	Nfkbia	10090.ENSMUSP00000000193	10090.ENSMUSP00000021413	0	0	0	0	0.193	0	0	0.703	0.75
Il1b	Il1rn	10090.ENSMUSP00000028881	10090.ENSMUSP00000110126	0	0	0.092	0.69	0.325	0	0	0.623	0.749
Il6	Lcn2	10090.ENSMUSP00000026845	10090.ENSMUSP00000053962	0	0	0	0	0.085	0	0	0.731	0.743
Cybb	Il6	10090.ENSMUSP00000015484	10090.ENSMUSP00000026845	0	0	0	0	0.106	0	0	0.718	0.738
Il6	Tnfaip3	10090.ENSMUSP00000026845	10090.ENSMUSP00000019997	0	0	0	0	0.302	0	0	0.635	0.735
Bcl3	Fos	10090.ENSMUSP00000113851	10090.ENSMUSP00000021674	0	0	0	0	0.071	0.093	0	0.709	0.733
Csf3	Lif	10090.ENSMUSP00000037762	10090.ENSMUSP00000067066	0	0	0.204	0	0.219	0	0	0.605	0.733
Fgr	Syk	10090.ENSMUSP00000030693	10090.ENSMUSP00000113852	0	0	0	0.716	0.244	0.335	0	0.509	0.732
Ccl3	Nfkbia	10090.ENSMUSP00000001008	10090.ENSMUSP00000021413	0	0	0	0	0.176	0	0	0.687	0.731
Il1a	Nfkbia	10090.ENSMUSP00000028882	10090.ENSMUSP00000021413	0	0	0	0	0.261	0	0	0.646	0.728
Fgr	Lcp2	10090.ENSMUSP00000030693	10090.ENSMUSP00000056621	0	0	0	0	0.209	0.095	0	0.648	0.726
Irf7	Nfkbia	10090.ENSMUSP00000026571	10090.ENSMUSP00000021413	0	0	0	0	0.075	0.058	0	0.708	0.723
Fos	Nfkbia	10090.ENSMUSP00000021674	10090.ENSMUSP00000021413	0	0	0	0	0.15	0.072	0	0.675	0.722
Fcgr2b	Il6	10090.ENSMUSP00000027966	10090.ENSMUSP00000026845	0	0	0	0	0.131	0	0	0.691	0.72
Il13ra1	Lif	10090.ENSMUSP00000033418	10090.ENSMUSP00000067066	0	0	0.203	0	0	0	0.65	0.08	0.72
Icam1	Relb	10090.ENSMUSP00000083587	10090.ENSMUSP00000092355	0	0	0	0	0.425	0.119	0	0.487	0.717
Relb	Tnfaip3	10090.ENSMUSP00000092355	10090.ENSMUSP00000019997	0	0	0	0	0.338	0.076	0	0.573	0.716
Ccl2	Cd14	10090.ENSMUSP00000000193	10090.ENSMUSP00000056669	0	0	0	0	0.225	0	0	0.648	0.715
Ccl2	Fgf2	10090.ENSMUSP00000000193	10090.ENSMUSP00000143094	0	0	0	0	0.105	0	0	0.693	0.714
Ikbke	Nfkbia	10090.ENSMUSP00000054126	10090.ENSMUSP00000021413	0	0	0	0	0.061	0.168	0	0.662	0.713
Ccl2	Il4ra	10090.ENSMUSP00000000193	10090.ENSMUSP00000033004	0	0	0	0	0.164	0	0	0.669	0.712
Irf7	Socs3	10090.ENSMUSP00000026571	10090.ENSMUSP00000059129	0	0	0	0	0.107	0.093	0	0.673	0.712
Ifih1	Il6	10090.ENSMUSP00000028259	10090.ENSMUSP00000026845	0	0	0	0	0.144	0	0	0.676	0.711
Bcl3	Icam1	10090.ENSMUSP00000113851	10090.ENSMUSP00000083587	0	0	0	0	0.419	0	0	0.522	0.71
Ccl4	Icam1	10090.ENSMUSP00000019074	10090.ENSMUSP00000083587	0	0	0	0	0.189	0	0	0.657	0.71
Nfkbie	Tnfaip3	10090.ENSMUSP00000024742	10090.ENSMUSP00000019997	0	0	0	0	0.266	0.058	0	0.614	0.71
Il6	Relb	10090.ENSMUSP00000026845	10090.ENSMUSP00000092355	0	0	0	0	0.138	0.076	0	0.66	0.706
Ccl3	Ccrl2	10090.ENSMUSP00000001008	10090.ENSMUSP00000107519	0	0	0	0	0.331	0	0	0.576	0.704
Fas	Il6	10090.ENSMUSP00000025691	10090.ENSMUSP00000026845	0	0	0	0	0.145	0	0	0.668	0.704
Ccl2	Lcn2	10090.ENSMUSP00000000193	10090.ENSMUSP00000053962	0	0	0	0	0.104	0	0	0.68	0.701
Csf3	Il13ra1	10090.ENSMUSP00000037762	10090.ENSMUSP00000033418	0	0	0	0	0.043	0	0.65	0.171	0.698
Bcl3	Il6	10090.ENSMUSP00000113851	10090.ENSMUSP00000026845	0	0	0	0	0.165	0.041	0	0.652	0.697
Fcgr2b	Il1b	10090.ENSMUSP00000027966	10090.ENSMUSP00000028881	0	0	0	0	0.183	0	0	0.644	0.697
Il4ra	Lif	10090.ENSMUSP00000033004	10090.ENSMUSP00000067066	0	0	0	0	0.073	0	0.65	0.142	0.697
Icam1	Lcn2	10090.ENSMUSP00000083587	10090.ENSMUSP00000053962	0	0	0	0	0.115	0	0	0.668	0.693
Il6	Map3k8	10090.ENSMUSP00000026845	10090.ENSMUSP00000025078	0	0	0	0	0.173	0	0	0.639	0.689
Ifih1	Il1b	10090.ENSMUSP00000028259	10090.ENSMUSP00000028881	0	0	0	0	0.164	0	0	0.642	0.688
Ccl3	Il1rn	10090.ENSMUSP00000001008	10090.ENSMUSP00000110126	0	0	0	0	0.234	0	0	0.607	0.686
Nfkbia	Socs3	10090.ENSMUSP00000021413	10090.ENSMUSP00000059129	0	0	0	0	0.356	0.093	0	0.501	0.683
Cxcl10	Eif2ak2	10090.ENSMUSP00000047646	10090.ENSMUSP00000024884	0	0	0	0	0.333	0	0	0.543	0.682
Ccrl2	Cxcl10	10090.ENSMUSP00000107519	10090.ENSMUSP00000047646	0	0	0	0	0.28	0.072	0	0.561	0.681
Cxcl10	Nfkbia	10090.ENSMUSP00000047646	10090.ENSMUSP00000021413	0	0	0	0	0.178	0	0	0.626	0.68
Cd14	Msr1	10090.ENSMUSP00000056669	10090.ENSMUSP00000026021	0	0	0	0	0.168	0.098	0	0.606	0.678
Il1b	Irf7	10090.ENSMUSP00000028881	10090.ENSMUSP00000026571	0	0	0	0	0.104	0	0	0.654	0.677
Il6	Syk	10090.ENSMUSP00000026845	10090.ENSMUSP00000113852	0	0	0	0	0.109	0	0	0.652	0.677
Ccl3	Cd14	10090.ENSMUSP00000001008	10090.ENSMUSP00000056669	0	0	0	0	0.358	0	0	0.517	0.676
Cybb	Icam1	10090.ENSMUSP00000015484	10090.ENSMUSP00000083587	0	0	0	0	0.172	0	0	0.62	0.672
Il1b	Syk	10090.ENSMUSP00000028881	10090.ENSMUSP00000113852	0	0	0	0	0.125	0	0	0.641	0.672
Csf3	Syk	10090.ENSMUSP00000037762	10090.ENSMUSP00000113852	0	0	0	0	0.046	0	0.5	0.364	0.67
Icam1	Socs3	10090.ENSMUSP00000083587	10090.ENSMUSP00000059129	0	0	0	0	0.397	0	0	0.473	0.668
Csf3	Psmb8	10090.ENSMUSP00000037762	10090.ENSMUSP00000025196	0	0	0	0	0.127	0.551	0	0.218	0.667
Ccn1	Fos	10090.ENSMUSP00000029846	10090.ENSMUSP00000021674	0	0	0	0	0.329	0	0	0.523	0.666
Cxcl10	Il1rn	10090.ENSMUSP00000047646	10090.ENSMUSP00000110126	0	0	0	0	0.187	0	0	0.606	0.666
Eif2ak2	Il6	10090.ENSMUSP00000024884	10090.ENSMUSP00000026845	0	0	0	0	0.101	0	0	0.643	0.665
Il1b	Relb	10090.ENSMUSP00000028881	10090.ENSMUSP00000092355	0	0	0	0	0.125	0	0	0.632	0.664
Bcl3	Nfkbie	10090.ENSMUSP00000113851	10090.ENSMUSP00000024742	0	0	0.135	0.772	0.237	0	0	0.53	0.663
Fcer1g	Il2rg	10090.ENSMUSP00000078875	10090.ENSMUSP00000033664	0	0	0	0	0.18	0	0	0.607	0.663
Cd14	Icam1	10090.ENSMUSP00000056669	10090.ENSMUSP00000083587	0	0	0	0	0.185	0	0	0.603	0.662
Fas	Il1b	10090.ENSMUSP00000025691	10090.ENSMUSP00000028881	0	0	0	0	0.16	0	0	0.615	0.662
Tnfsf8	Tnfsf9	10090.ENSMUSP00000030047	10090.ENSMUSP00000040412	0	0	0	0	0.057	0.069	0	0.645	0.661
Csf3	Icam1	10090.ENSMUSP00000037762	10090.ENSMUSP00000083587	0	0	0	0	0.057	0	0	0.654	0.659
Fos	Socs3	10090.ENSMUSP00000021674	10090.ENSMUSP00000059129	0	0	0	0	0.284	0	0	0.543	0.659
Ccrl2	Il1b	10090.ENSMUSP00000107519	10090.ENSMUSP00000028881	0	0	0	0	0.476	0	0	0.375	0.658
Cd14	Irf7	10090.ENSMUSP00000056669	10090.ENSMUSP00000026571	0	0	0	0	0.1	0	0.5	0.298	0.656
Ccl2	Cybb	10090.ENSMUSP00000000193	10090.ENSMUSP00000015484	0	0	0	0	0.125	0	0	0.622	0.655
Eif2ak2	Il1b	10090.ENSMUSP00000024884	10090.ENSMUSP00000028881	0	0	0	0	0.099	0	0	0.626	0.649
Ccl2	Ccn1	10090.ENSMUSP00000000193	10090.ENSMUSP00000029846	0	0	0	0	0.181	0	0	0.587	0.647
Cd14	Ikbke	10090.ENSMUSP00000056669	10090.ENSMUSP00000054126	0	0	0	0	0.104	0.098	0.5	0.231	0.647
Fgf2	Il1a	10090.ENSMUSP00000143094	10090.ENSMUSP00000028882	0	0	0	0	0.1	0	0	0.622	0.646
Ccl2	Fcgr2b	10090.ENSMUSP00000000193	10090.ENSMUSP00000027966	0	0	0	0	0.096	0	0	0.623	0.644
Bcl3	Nfkbia	10090.ENSMUSP00000113851	10090.ENSMUSP00000021413	0	0	0.18	0.692	0.199	0	0	0.499	0.642
Gbp2	Irf7	10090.ENSMUSP00000132435	10090.ENSMUSP00000026571	0	0	0	0	0.324	0	0	0.491	0.641
Socs3	Syk	10090.ENSMUSP00000059129	10090.ENSMUSP00000113852	0	0	0	0	0.081	0.073	0.5	0.254	0.64
Icam1	Tnfaip3	10090.ENSMUSP00000083587	10090.ENSMUSP00000019997	0	0	0	0	0.355	0	0	0.461	0.638
Ikbke	Il6	10090.ENSMUSP00000054126	10090.ENSMUSP00000026845	0	0	0	0	0.105	0	0	0.612	0.638
Ccl4	Il1rn	10090.ENSMUSP00000019074	10090.ENSMUSP00000110126	0	0	0	0	0.187	0	0	0.572	0.637
Cxcl10	Socs3	10090.ENSMUSP00000047646	10090.ENSMUSP00000059129	0	0	0	0	0.272	0	0	0.518	0.634
Fcgr2b	Fgr	10090.ENSMUSP00000027966	10090.ENSMUSP00000030693	0	0	0	0	0.19	0.094	0.4	0.259	0.63
Pik3r5	Syk	10090.ENSMUSP00000021283	10090.ENSMUSP00000113852	0	0	0	0	0.118	0	0.5	0.227	0.629
Csf2rb	Fcer1g	10090.ENSMUSP00000154836	10090.ENSMUSP00000078875	0	0	0	0	0.227	0	0	0.537	0.627
Fas	Icam1	10090.ENSMUSP00000025691	10090.ENSMUSP00000083587	0	0	0	0	0.202	0	0	0.552	0.627
Fcer1g	Fgr	10090.ENSMUSP00000078875	10090.ENSMUSP00000030693	0	0	0	0	0.298	0.097	0	0.459	0.627
Il13ra1	Il1b	10090.ENSMUSP00000033418	10090.ENSMUSP00000028881	0	0	0	0	0.133	0	0	0.585	0.624
Rsad2	Trim30a	10090.ENSMUSP00000020970	10090.ENSMUSP00000076189	0	0	0	0	0.278	0.049	0	0.495	0.622
Pik3r5	Socs3	10090.ENSMUSP00000021283	10090.ENSMUSP00000059129	0	0	0	0	0.103	0	0.54	0.156	0.621
Fos	Irf7	10090.ENSMUSP00000021674	10090.ENSMUSP00000026571	0	0	0	0	0.083	0.098	0	0.576	0.618
Ccl2	Irf7	10090.ENSMUSP00000000193	10090.ENSMUSP00000026571	0	0	0	0	0.155	0	0	0.562	0.614
Nfkbia	Syk	10090.ENSMUSP00000021413	10090.ENSMUSP00000113852	0	0	0	0	0.076	0.095	0	0.573	0.612
Cxcl10	Fgf2	10090.ENSMUSP00000047646	10090.ENSMUSP00000143094	0	0	0	0	0.053	0	0	0.607	0.611
Ccl3	Fgf2	10090.ENSMUSP00000001008	10090.ENSMUSP00000143094	0	0	0	0	0.047	0	0	0.608	0.61
Ccl2	Tnfaip3	10090.ENSMUSP00000000193	10090.ENSMUSP00000019997	0	0	0	0	0.298	0	0	0.465	0.609
Gbp2	Rsad2	10090.ENSMUSP00000132435	10090.ENSMUSP00000020970	0	0	0	0	0.257	0	0	0.495	0.609
Ccl4	Cd14	10090.ENSMUSP00000019074	10090.ENSMUSP00000056669	0	0	0	0	0.287	0	0	0.474	0.608
Ccl2	Fos	10090.ENSMUSP00000000193	10090.ENSMUSP00000021674	0	0	0	0	0.127	0	0	0.567	0.606
Ccl2	Msr1	10090.ENSMUSP00000000193	10090.ENSMUSP00000026021	0	0	0	0	0.202	0.097	0	0.491	0.601
Il1a	Lif	10090.ENSMUSP00000028882	10090.ENSMUSP00000067066	0	0	0	0	0.239	0	0	0.497	0.601
Socs3	Tnfaip3	10090.ENSMUSP00000059129	10090.ENSMUSP00000019997	0	0	0	0	0.292	0	0	0.455	0.598
Il13ra1	Il2rg	10090.ENSMUSP00000033418	10090.ENSMUSP00000033664	0	0	0	0.591	0.054	0.093	0	0.568	0.597
Fos	Syk	10090.ENSMUSP00000021674	10090.ENSMUSP00000113852	0	0	0	0	0.047	0.097	0	0.567	0.595
Icam1	Irf7	10090.ENSMUSP00000083587	10090.ENSMUSP00000026571	0	0	0	0	0.128	0.041	0	0.555	0.595
Cybb	Syk	10090.ENSMUSP00000015484	10090.ENSMUSP00000113852	0	0	0	0	0.33	0.059	0	0.408	0.594
Ikbke	Relb	10090.ENSMUSP00000054126	10090.ENSMUSP00000092355	0	0	0	0	0.158	0.128	0	0.492	0.594
Il1b	Lif	10090.ENSMUSP00000028881	10090.ENSMUSP00000067066	0	0	0	0	0.15	0	0	0.542	0.594
Il1b	Il4ra	10090.ENSMUSP00000028881	10090.ENSMUSP00000033004	0	0	0	0	0.12	0	0	0.556	0.592
Cxcl10	Tnfaip3	10090.ENSMUSP00000047646	10090.ENSMUSP00000019997	0	0	0	0	0.27	0	0	0.461	0.59
Il6	Msr1	10090.ENSMUSP00000026845	10090.ENSMUSP00000026021	0	0	0	0	0.137	0.104	0	0.513	0.59
Map3k8	Tnfaip3	10090.ENSMUSP00000025078	10090.ENSMUSP00000019997	0	0	0	0	0.347	0.057	0	0.384	0.588
Nfkbia	Psmb8	10090.ENSMUSP00000021413	10090.ENSMUSP00000025196	0	0	0	0	0.168	0.087	0.4	0.203	0.588
Fcer1g	Pik3r5	10090.ENSMUSP00000078875	10090.ENSMUSP00000021283	0	0	0	0	0.14	0	0.5	0.115	0.586
Ikbke	Il1b	10090.ENSMUSP00000054126	10090.ENSMUSP00000028881	0	0	0	0	0.123	0	0	0.546	0.585
Ifih1	Trim30a	10090.ENSMUSP00000028259	10090.ENSMUSP00000076189	0	0	0	0	0.427	0.095	0	0.261	0.583
Cd14	Il1a	10090.ENSMUSP00000056669	10090.ENSMUSP00000028882	0	0	0	0	0.213	0	0	0.491	0.582
Ccrl2	Il6	10090.ENSMUSP00000107519	10090.ENSMUSP00000026845	0	0	0	0	0.178	0	0	0.51	0.58
Ccl4	Ccrl2	10090.ENSMUSP00000019074	10090.ENSMUSP00000107519	0	0	0	0	0.335	0	0	0.389	0.576
Bcl3	Tnfaip3	10090.ENSMUSP00000113851	10090.ENSMUSP00000019997	0	0	0	0	0.205	0.058	0	0.476	0.574
Lif	Socs3	10090.ENSMUSP00000067066	10090.ENSMUSP00000059129	0	0	0	0	0.072	0	0	0.556	0.57
Ccl3	Fcgr2b	10090.ENSMUSP00000001008	10090.ENSMUSP00000027966	0	0	0	0	0.181	0	0	0.493	0.567
Ccl2	Relb	10090.ENSMUSP00000000193	10090.ENSMUSP00000092355	0	0	0	0	0.155	0.117	0	0.465	0.566
Cxcl10	Fas	10090.ENSMUSP00000047646	10090.ENSMUSP00000025691	0	0	0	0	0.222	0	0	0.465	0.566
Il1b	Msr1	10090.ENSMUSP00000028881	10090.ENSMUSP00000026021	0	0	0	0	0.181	0.097	0	0.459	0.565
Cd14	Cxcl10	10090.ENSMUSP00000056669	10090.ENSMUSP00000047646	0	0	0	0	0.146	0	0	0.511	0.564
Cd14	Fcgr2b	10090.ENSMUSP00000056669	10090.ENSMUSP00000027966	0	0	0	0	0.178	0	0	0.49	0.563
Csf3	Il1rn	10090.ENSMUSP00000037762	10090.ENSMUSP00000110126	0	0	0	0	0.133	0	0	0.517	0.563
Map3k8	Nfkbia	10090.ENSMUSP00000025078	10090.ENSMUSP00000021413	0	0	0	0	0.181	0.1	0	0.454	0.563
Psmb8	Relb	10090.ENSMUSP00000025196	10090.ENSMUSP00000092355	0	0	0	0	0.136	0.066	0.4	0.202	0.562
Irf7	Psmb8	10090.ENSMUSP00000026571	10090.ENSMUSP00000025196	0	0	0	0	0.339	0	0	0.363	0.561
Ccl3	Tnfsf9	10090.ENSMUSP00000001008	10090.ENSMUSP00000040412	0	0	0	0	0.151	0	0	0.503	0.56
Bcl3	Il1b	10090.ENSMUSP00000113851	10090.ENSMUSP00000028881	0	0	0	0	0.232	0	0	0.447	0.558
Fcgr2b	Icam1	10090.ENSMUSP00000027966	10090.ENSMUSP00000083587	0	0	0	0	0.136	0	0	0.51	0.558
Ccl4	Fgf2	10090.ENSMUSP00000019074	10090.ENSMUSP00000143094	0	0	0	0	0.046	0	0	0.554	0.556
Cd14	Il1rn	10090.ENSMUSP00000056669	10090.ENSMUSP00000110126	0	0	0	0	0.366	0	0	0.328	0.555
Cxcl10	Ikbke	10090.ENSMUSP00000047646	10090.ENSMUSP00000054126	0	0	0	0	0.108	0	0	0.521	0.555
Fcgr2b	Msr1	10090.ENSMUSP00000027966	10090.ENSMUSP00000026021	0	0	0	0	0.283	0.135	0	0.337	0.553
Ccl2	Lif	10090.ENSMUSP00000000193	10090.ENSMUSP00000067066	0	0	0	0	0.09	0	0	0.528	0.552
Fgr	Icam1	10090.ENSMUSP00000030693	10090.ENSMUSP00000083587	0	0	0	0	0.173	0	0	0.48	0.551
Il1a	Tnfaip3	10090.ENSMUSP00000028882	10090.ENSMUSP00000019997	0	0	0	0	0.216	0	0	0.45	0.55
Il1a	Tnfsf9	10090.ENSMUSP00000028882	10090.ENSMUSP00000040412	0	0	0	0	0.225	0	0	0.442	0.549
Ccl4	Tnfsf9	10090.ENSMUSP00000019074	10090.ENSMUSP00000040412	0	0	0	0	0.122	0	0	0.504	0.546
Fgf2	Fos	10090.ENSMUSP00000143094	10090.ENSMUSP00000021674	0	0	0	0	0.085	0	0	0.522	0.544
Il1b	Map3k8	10090.ENSMUSP00000028881	10090.ENSMUSP00000025078	0	0	0	0	0.215	0	0	0.443	0.544
Map3k8	Relb	10090.ENSMUSP00000025078	10090.ENSMUSP00000092355	0	0	0	0	0.171	0.241	0	0.334	0.544
Ccl2	Fas	10090.ENSMUSP00000000193	10090.ENSMUSP00000025691	0	0	0	0	0.141	0	0	0.49	0.543
Fcgr2b	Il2rg	10090.ENSMUSP00000027966	10090.ENSMUSP00000033664	0	0	0	0	0.096	0	0	0.515	0.542
Cxcl10	Psmb8	10090.ENSMUSP00000047646	10090.ENSMUSP00000025196	0	0	0	0	0.31	0	0	0.361	0.54
Icam1	Il2rg	10090.ENSMUSP00000083587	10090.ENSMUSP00000033664	0	0	0	0	0.303	0	0	0.365	0.539
Icam1	Il1rn	10090.ENSMUSP00000083587	10090.ENSMUSP00000110126	0	0	0	0	0.167	0	0	0.467	0.537
Ccl3	Socs3	10090.ENSMUSP00000001008	10090.ENSMUSP00000059129	0	0	0	0	0.171	0	0	0.461	0.534
Cxcl10	Lcn2	10090.ENSMUSP00000047646	10090.ENSMUSP00000053962	0	0	0	0	0.083	0	0	0.513	0.534
Ccl4	Nfkbia	10090.ENSMUSP00000019074	10090.ENSMUSP00000021413	0	0	0	0	0.171	0	0	0.46	0.533
Irf7	Tnfaip3	10090.ENSMUSP00000026571	10090.ENSMUSP00000019997	0	0	0	0	0.137	0.093	0	0.452	0.533
Ccl2	Ifih1	10090.ENSMUSP00000000193	10090.ENSMUSP00000028259	0	0	0	0	0.143	0	0	0.477	0.532
Il1rn	Relb	10090.ENSMUSP00000110126	10090.ENSMUSP00000092355	0	0	0	0	0.103	0.076	0	0.478	0.53
Cxcl10	Fcgr2b	10090.ENSMUSP00000047646	10090.ENSMUSP00000027966	0	0	0	0	0.111	0	0	0.489	0.526
Cybb	Fcer1g	10090.ENSMUSP00000015484	10090.ENSMUSP00000078875	0	0	0	0	0.295	0	0	0.354	0.525
Il1b	Il2rg	10090.ENSMUSP00000028881	10090.ENSMUSP00000033664	0	0	0	0	0.157	0	0	0.459	0.525
Eif2ak2	Nfkbia	10090.ENSMUSP00000024884	10090.ENSMUSP00000021413	0	0	0	0	0.089	0.058	0	0.49	0.524
Icam1	Syk	10090.ENSMUSP00000083587	10090.ENSMUSP00000113852	0	0	0	0	0.121	0	0	0.48	0.523
Il13ra1	Il1a	10090.ENSMUSP00000033418	10090.ENSMUSP00000028882	0	0	0	0	0.079	0	0	0.503	0.523
Ccl4	Irf7	10090.ENSMUSP00000019074	10090.ENSMUSP00000026571	0	0	0	0	0.104	0	0	0.488	0.521
Cybb	Nfkbia	10090.ENSMUSP00000015484	10090.ENSMUSP00000021413	0	0	0	0	0.124	0	0	0.476	0.521
Fcer1g	Il6	10090.ENSMUSP00000078875	10090.ENSMUSP00000026845	0	0	0	0	0.121	0	0	0.478	0.521
Ccl4	Fcgr2b	10090.ENSMUSP00000019074	10090.ENSMUSP00000027966	0	0	0	0	0.155	0	0	0.455	0.52
Cxcl10	Relb	10090.ENSMUSP00000047646	10090.ENSMUSP00000092355	0	0	0	0	0.213	0.069	0	0.398	0.52
Ccl4	Tnfaip3	10090.ENSMUSP00000019074	10090.ENSMUSP00000019997	0	0	0	0	0.256	0	0	0.381	0.519
Csf3	Lcn2	10090.ENSMUSP00000037762	10090.ENSMUSP00000053962	0	0	0	0	0.104	0	0	0.479	0.513
Il1a	Lcn2	10090.ENSMUSP00000028882	10090.ENSMUSP00000053962	0	0	0	0	0.086	0	0	0.489	0.513
Cd14	Lcn2	10090.ENSMUSP00000056669	10090.ENSMUSP00000053962	0	0	0	0	0.332	0	0	0.3	0.512
Cd14	Csf3	10090.ENSMUSP00000056669	10090.ENSMUSP00000037762	0	0	0	0	0.081	0	0	0.49	0.511
Ccl3	Irf7	10090.ENSMUSP00000001008	10090.ENSMUSP00000026571	0	0	0	0	0.073	0	0	0.493	0.51
Csf3	Nfkbia	10090.ENSMUSP00000037762	10090.ENSMUSP00000021413	0	0	0	0	0.083	0.135	0	0.432	0.51
H2-Q4	Psmb8	10090.ENSMUSP00000080159	10090.ENSMUSP00000025196	0	0	0	0	0.14	0	0	0.454	0.51
Csf3	Irf7	10090.ENSMUSP00000037762	10090.ENSMUSP00000026571	0	0	0	0	0.062	0.042	0	0.495	0.507
Cybb	Fcgr2b	10090.ENSMUSP00000015484	10090.ENSMUSP00000027966	0	0	0	0	0.326	0	0	0.298	0.507
Cd14	Nfkbia	10090.ENSMUSP00000056669	10090.ENSMUSP00000021413	0	0	0	0	0.154	0.091	0	0.41	0.506
Fcgr2b	Il4ra	10090.ENSMUSP00000027966	10090.ENSMUSP00000033004	0	0	0	0	0.107	0.07	0	0.453	0.506
Icam1	Nfkbie	10090.ENSMUSP00000083587	10090.ENSMUSP00000024742	0	0	0	0	0.338	0	0	0.285	0.506
Ccl3	Syk	10090.ENSMUSP00000001008	10090.ENSMUSP00000113852	0	0	0	0	0.132	0	0	0.453	0.505
Il1b	Rsad2	10090.ENSMUSP00000028881	10090.ENSMUSP00000020970	0	0	0	0	0.125	0	0	0.457	0.505
Ccl2	Eif2ak2	10090.ENSMUSP00000000193	10090.ENSMUSP00000024884	0	0	0	0	0.127	0	0	0.455	0.504
Cd14	Il4ra	10090.ENSMUSP00000056669	10090.ENSMUSP00000033004	0	0	0	0	0.143	0.098	0	0.41	0.504
Il6	Rsad2	10090.ENSMUSP00000026845	10090.ENSMUSP00000020970	0	0	0	0	0.101	0	0	0.471	0.504
Fas	Nfkbia	10090.ENSMUSP00000025691	10090.ENSMUSP00000021413	0	0	0	0	0.21	0	0	0.396	0.502
Il1a	Socs3	10090.ENSMUSP00000028882	10090.ENSMUSP00000059129	0	0	0	0	0.172	0	0	0.423	0.502
Nfkbie	Psmb8	10090.ENSMUSP00000024742	10090.ENSMUSP00000025196	0	0	0	0	0.108	0.087	0.4	0.102	0.502
Ccl3	Fcer1g	10090.ENSMUSP00000001008	10090.ENSMUSP00000078875	0	0	0	0	0.262	0	0	0.352	0.501
Ccrl2	Il1a	10090.ENSMUSP00000107519	10090.ENSMUSP00000028882	0	0	0	0	0.326	0	0	0.291	0.501
Ccn1	Il1b	10090.ENSMUSP00000029846	10090.ENSMUSP00000028881	0	0	0	0	0.11	0	0	0.461	0.5
Irf7	Relb	10090.ENSMUSP00000026571	10090.ENSMUSP00000092355	0	0	0	0	0.107	0.092	0	0.433	0.5
Cxcl10	Endou	10090.ENSMUSP00000047646	10090.ENSMUSP00000023105	0	0	0	0	0	0	0	0.496	0.496
Ifih1	Psmb8	10090.ENSMUSP00000028259	10090.ENSMUSP00000025196	0	0	0	0	0.293	0	0	0.316	0.496
Ccl3	Cybb	10090.ENSMUSP00000001008	10090.ENSMUSP00000015484	0	0	0	0	0.136	0	0	0.439	0.495
Cxcl10	Fcer1g	10090.ENSMUSP00000047646	10090.ENSMUSP00000078875	0	0	0	0	0.157	0	0	0.426	0.495
Ikbke	Rsad2	10090.ENSMUSP00000054126	10090.ENSMUSP00000020970	0	0	0	0	0.087	0.051	0	0.458	0.49
Ccl4	Socs3	10090.ENSMUSP00000019074	10090.ENSMUSP00000059129	0	0	0	0	0.155	0	0	0.42	0.489
Fos	Il1a	10090.ENSMUSP00000021674	10090.ENSMUSP00000028882	0	0	0	0	0.09	0	0	0.462	0.489
Il6	Tnfsf9	10090.ENSMUSP00000026845	10090.ENSMUSP00000040412	0	0	0	0	0.105	0	0	0.453	0.489
Ifih1	Nfkbia	10090.ENSMUSP00000028259	10090.ENSMUSP00000021413	0	0	0	0	0.105	0	0	0.451	0.488
Endou	Ifih1	10090.ENSMUSP00000023105	10090.ENSMUSP00000028259	0	0	0	0	0	0	0	0.488	0.487
Fos	Icam1	10090.ENSMUSP00000021674	10090.ENSMUSP00000083587	0	0	0	0	0.1	0	0	0.453	0.487
Il1b	Nfkbie	10090.ENSMUSP00000028881	10090.ENSMUSP00000024742	0	0	0	0	0.199	0	0	0.384	0.486
Il2rg	Lcp2	10090.ENSMUSP00000033664	10090.ENSMUSP00000056621	0	0	0	0	0.356	0	0	0.234	0.485
Fcer1g	Il1b	10090.ENSMUSP00000078875	10090.ENSMUSP00000028881	0	0	0	0	0.184	0	0	0.393	0.484
Ikbke	Nfkbie	10090.ENSMUSP00000054126	10090.ENSMUSP00000024742	0	0	0	0	0.13	0.095	0	0.397	0.484
Csf2rb	Fgr	10090.ENSMUSP00000154836	10090.ENSMUSP00000030693	0	0	0	0	0.31	0.094	0	0.239	0.483
Cybb	Fgr	10090.ENSMUSP00000015484	10090.ENSMUSP00000030693	0	0	0	0	0.355	0.059	0	0.216	0.483
Fcgr2b	Il1a	10090.ENSMUSP00000027966	10090.ENSMUSP00000028882	0	0	0	0	0.154	0	0	0.413	0.482
Il1a	Irf7	10090.ENSMUSP00000028882	10090.ENSMUSP00000026571	0	0	0	0	0.083	0	0	0.457	0.481
Fos	Relb	10090.ENSMUSP00000021674	10090.ENSMUSP00000092355	0	0	0	0	0.084	0.116	0	0.407	0.478
Ccn1	Il6	10090.ENSMUSP00000029846	10090.ENSMUSP00000026845	0	0	0	0	0.116	0	0	0.431	0.476
Ifih1	Tnfaip3	10090.ENSMUSP00000028259	10090.ENSMUSP00000019997	0	0	0	0	0.153	0	0	0.406	0.476
Relb	Syk	10090.ENSMUSP00000092355	10090.ENSMUSP00000113852	0	0	0	0	0.121	0.098	0	0.391	0.476
Gbp2	Il1b	10090.ENSMUSP00000132435	10090.ENSMUSP00000028881	0	0	0	0	0.195	0	0	0.374	0.475
Fas	Il1a	10090.ENSMUSP00000025691	10090.ENSMUSP00000028882	0	0	0	0	0.133	0	0	0.417	0.474
Ccl2	Fcer1g	10090.ENSMUSP00000000193	10090.ENSMUSP00000078875	0	0	0	0	0.158	0	0	0.398	0.472
Ccl3	Tnfaip3	10090.ENSMUSP00000001008	10090.ENSMUSP00000019997	0	0	0	0	0.212	0	0	0.357	0.471
Ccl3	Ifih1	10090.ENSMUSP00000001008	10090.ENSMUSP00000028259	0	0	0	0	0.091	0	0	0.44	0.469
Il1rn	Socs3	10090.ENSMUSP00000110126	10090.ENSMUSP00000059129	0	0	0	0	0.15	0	0	0.4	0.468
Fas	Syk	10090.ENSMUSP00000025691	10090.ENSMUSP00000113852	0	0	0	0	0.11	0.085	0	0.398	0.467
Cxcl10	Lif	10090.ENSMUSP00000047646	10090.ENSMUSP00000067066	0	0	0	0	0.084	0	0	0.44	0.465
Cxcl10	Il4ra	10090.ENSMUSP00000047646	10090.ENSMUSP00000033004	0	0	0	0	0.079	0	0	0.442	0.464
Fgr	Il1b	10090.ENSMUSP00000030693	10090.ENSMUSP00000028881	0	0	0	0	0.287	0.072	0	0.254	0.464
Icam1	Lcp2	10090.ENSMUSP00000083587	10090.ENSMUSP00000056621	0	0	0	0	0.154	0	0	0.391	0.463
Ccl2	Syk	10090.ENSMUSP00000000193	10090.ENSMUSP00000113852	0	0	0	0	0.089	0	0	0.432	0.46
Cxcl10	Nfkbie	10090.ENSMUSP00000047646	10090.ENSMUSP00000024742	0	0	0	0	0.295	0	0	0.264	0.46
Cybb	Lcn2	10090.ENSMUSP00000015484	10090.ENSMUSP00000053962	0	0	0	0	0.134	0.078	0	0.378	0.46
Ccrl2	Tnfaip3	10090.ENSMUSP00000107519	10090.ENSMUSP00000019997	0	0	0	0	0.289	0	0	0.268	0.458
Ccl3	Lif	10090.ENSMUSP00000001008	10090.ENSMUSP00000067066	0	0	0	0	0.083	0	0	0.431	0.456
Il1rn	Tnfaip3	10090.ENSMUSP00000110126	10090.ENSMUSP00000019997	0	0	0	0	0.184	0	0	0.36	0.455
Ccl2	Gbp2	10090.ENSMUSP00000000193	10090.ENSMUSP00000132435	0	0	0	0	0.218	0	0	0.33	0.454
Cd14	Fgf2	10090.ENSMUSP00000056669	10090.ENSMUSP00000143094	0	0	0	0	0	0	0	0.454	0.454
Ccl3	Fos	10090.ENSMUSP00000001008	10090.ENSMUSP00000021674	0	0	0	0	0.104	0	0	0.414	0.452
Il1rn	Il4ra	10090.ENSMUSP00000110126	10090.ENSMUSP00000033004	0	0	0	0	0.128	0.044	0	0.395	0.452
Ccrl2	Fgr	10090.ENSMUSP00000107519	10090.ENSMUSP00000030693	0	0	0	0	0.138	0	0	0.389	0.451
Ccrl2	Icam1	10090.ENSMUSP00000107519	10090.ENSMUSP00000083587	0	0	0	0	0.238	0	0	0.309	0.451
Ifih1	Il1a	10090.ENSMUSP00000028259	10090.ENSMUSP00000028882	0	0	0	0	0.138	0	0	0.389	0.451
Il1rn	Msr1	10090.ENSMUSP00000110126	10090.ENSMUSP00000026021	0	0	0	0	0.336	0	0	0.206	0.45
Il6	Nfkbie	10090.ENSMUSP00000026845	10090.ENSMUSP00000024742	0	0	0	0	0.115	0.041	0	0.404	0.45
Gbp2	H2-Q4	10090.ENSMUSP00000132435	10090.ENSMUSP00000080159	0	0	0	0	0.134	0	0	0.39	0.449
Icam1	Tnfsf9	10090.ENSMUSP00000083587	10090.ENSMUSP00000040412	0	0	0	0	0.071	0	0	0.432	0.449
Cxcl10	Cybb	10090.ENSMUSP00000047646	10090.ENSMUSP00000015484	0	0	0	0	0.131	0	0	0.391	0.448
Cxcl10	Msr1	10090.ENSMUSP00000047646	10090.ENSMUSP00000026021	0	0	0	0	0.152	0	0	0.375	0.448
Bcl3	Ikbke	10090.ENSMUSP00000113851	10090.ENSMUSP00000054126	0	0	0	0	0.134	0.095	0	0.347	0.444
Bcl3	Map3k8	10090.ENSMUSP00000113851	10090.ENSMUSP00000025078	0	0	0	0	0.189	0.1	0	0.299	0.443
Cd14	Syk	10090.ENSMUSP00000056669	10090.ENSMUSP00000113852	0	0	0	0	0.116	0.098	0	0.358	0.443
Cd14	Socs3	10090.ENSMUSP00000056669	10090.ENSMUSP00000059129	0	0	0	0	0.239	0	0	0.297	0.443
Ccl4	Rsad2	10090.ENSMUSP00000019074	10090.ENSMUSP00000020970	0	0	0	0	0.176	0	0	0.351	0.442
Cd14	Cybb	10090.ENSMUSP00000056669	10090.ENSMUSP00000015484	0	0	0	0	0.166	0.066	0	0.342	0.442
Ccl3	Fas	10090.ENSMUSP00000001008	10090.ENSMUSP00000025691	0	0	0	0	0.114	0	0	0.395	0.441
Csf3	Fcgr2b	10090.ENSMUSP00000037762	10090.ENSMUSP00000027966	0	0	0	0	0	0	0	0.441	0.441
Il1a	Relb	10090.ENSMUSP00000028882	10090.ENSMUSP00000092355	0	0	0	0	0.059	0	0	0.43	0.441
Ccl3	Msr1	10090.ENSMUSP00000001008	10090.ENSMUSP00000026021	0	0	0	0	0.161	0.097	0	0.32	0.44
Ccl3	Il4ra	10090.ENSMUSP00000001008	10090.ENSMUSP00000033004	0	0	0	0	0.057	0	0	0.431	0.44
Ccl4	Syk	10090.ENSMUSP00000019074	10090.ENSMUSP00000113852	0	0	0	0	0.132	0	0	0.381	0.44
Cybb	Il1a	10090.ENSMUSP00000015484	10090.ENSMUSP00000028882	0	0	0	0	0.14	0	0	0.375	0.44
Eif2ak2	Ikbke	10090.ENSMUSP00000024884	10090.ENSMUSP00000054126	0	0	0.123	0.571	0.097	0.099	0	0.303	0.436
Gbp2	Icam1	10090.ENSMUSP00000132435	10090.ENSMUSP00000083587	0	0	0	0	0.305	0	0	0.221	0.436
Ccl4	Ifih1	10090.ENSMUSP00000019074	10090.ENSMUSP00000028259	0	0	0	0	0.108	0	0	0.393	0.435
Ikbke	Socs3	10090.ENSMUSP00000054126	10090.ENSMUSP00000059129	0	0	0	0	0.131	0.082	0	0.348	0.435
Ccl4	Lif	10090.ENSMUSP00000019074	10090.ENSMUSP00000067066	0	0	0	0	0.093	0	0	0.399	0.432
Fcer1g	Il4ra	10090.ENSMUSP00000078875	10090.ENSMUSP00000033004	0	0	0	0	0.139	0.097	0	0.324	0.429
Relb	Socs3	10090.ENSMUSP00000092355	10090.ENSMUSP00000059129	0	0	0	0	0.194	0.117	0	0.261	0.428
Fas	Il2rg	10090.ENSMUSP00000025691	10090.ENSMUSP00000033664	0	0	0	0	0.091	0	0	0.396	0.427
Icam1	Il4ra	10090.ENSMUSP00000083587	10090.ENSMUSP00000033004	0	0	0	0	0.151	0	0	0.353	0.427
Il13ra1	Il1rn	10090.ENSMUSP00000033418	10090.ENSMUSP00000110126	0	0	0	0	0.202	0	0	0.312	0.427
Ccl4	Fas	10090.ENSMUSP00000019074	10090.ENSMUSP00000025691	0	0	0	0	0.096	0	0	0.391	0.426
Csf2rb	Il1b	10090.ENSMUSP00000154836	10090.ENSMUSP00000028881	0	0	0	0	0.177	0	0	0.332	0.426
Fas	Irf7	10090.ENSMUSP00000025691	10090.ENSMUSP00000026571	0	0	0	0	0.142	0	0	0.359	0.426
Cxcl10	Il2rg	10090.ENSMUSP00000047646	10090.ENSMUSP00000033664	0	0	0	0	0.172	0	0	0.333	0.425
Cybb	Msr1	10090.ENSMUSP00000015484	10090.ENSMUSP00000026021	0	0	0	0	0.337	0	0	0.168	0.425
Eif2ak2	Socs3	10090.ENSMUSP00000024884	10090.ENSMUSP00000059129	0	0	0	0	0.118	0	0	0.375	0.425
Lcn2	Socs3	10090.ENSMUSP00000053962	10090.ENSMUSP00000059129	0	0	0	0	0.132	0	0	0.365	0.425
Ccn1	Fgf2	10090.ENSMUSP00000029846	10090.ENSMUSP00000143094	0	0	0	0	0.08	0	0	0.399	0.423
Map3k8	Nfkbie	10090.ENSMUSP00000025078	10090.ENSMUSP00000024742	0	0	0	0	0.202	0.1	0	0.261	0.423
Ccl3	Lcn2	10090.ENSMUSP00000001008	10090.ENSMUSP00000053962	0	0	0	0	0.079	0	0	0.398	0.421
Ccl4	Fcer1g	10090.ENSMUSP00000019074	10090.ENSMUSP00000078875	0	0	0	0	0.22	0	0	0.285	0.419
Il6	Tnfsf8	10090.ENSMUSP00000026845	10090.ENSMUSP00000030047	0	0	0	0	0.139	0	0	0.352	0.418
Csf2rb	Cybb	10090.ENSMUSP00000154836	10090.ENSMUSP00000015484	0	0	0	0	0.349	0	0	0.141	0.417
Ifih1	Socs3	10090.ENSMUSP00000028259	10090.ENSMUSP00000059129	0	0	0	0	0.117	0	0	0.364	0.415
Ccrl2	Il1rn	10090.ENSMUSP00000107519	10090.ENSMUSP00000110126	0	0	0	0	0.189	0	0	0.308	0.414
Il1rn	Irf7	10090.ENSMUSP00000110126	10090.ENSMUSP00000026571	0	0	0	0	0.148	0	0	0.34	0.414
Irf7	Syk	10090.ENSMUSP00000026571	10090.ENSMUSP00000113852	0	0	0	0	0.087	0.096	0	0.346	0.413
Fos	Tnfaip3	10090.ENSMUSP00000021674	10090.ENSMUSP00000019997	0	0	0	0	0.18	0	0	0.311	0.411
Fcgr2b	Irf7	10090.ENSMUSP00000027966	10090.ENSMUSP00000026571	0	0	0	0	0.097	0	0	0.374	0.41
Ccl3	Il2rg	10090.ENSMUSP00000001008	10090.ENSMUSP00000033664	0	0	0	0	0.154	0	0	0.33	0.409
Csf2rb	Syk	10090.ENSMUSP00000154836	10090.ENSMUSP00000113852	0	0	0	0	0.217	0.076	0	0.248	0.408
Ccl4	Fos	10090.ENSMUSP00000019074	10090.ENSMUSP00000021674	0	0	0	0	0.093	0	0	0.373	0.407
Csf3	Fos	10090.ENSMUSP00000037762	10090.ENSMUSP00000021674	0	0	0	0	0.086	0	0	0.376	0.405
Fgf2	Il1rn	10090.ENSMUSP00000143094	10090.ENSMUSP00000110126	0	0	0	0	0.09	0	0	0.374	0.405
Fos	Map3k8	10090.ENSMUSP00000021674	10090.ENSMUSP00000025078	0	0	0	0	0.084	0.054	0	0.368	0.404
Cxcl10	Tnfsf9	10090.ENSMUSP00000047646	10090.ENSMUSP00000040412	0	0	0	0	0.104	0	0	0.362	0.403
Il1rn	Lcn2	10090.ENSMUSP00000110126	10090.ENSMUSP00000053962	0	0	0	0	0.147	0	0	0.328	0.403
Il1a	Nfkbie	10090.ENSMUSP00000028882	10090.ENSMUSP00000024742	0	0	0	0	0.203	0	0	0.28	0.402
Cybb	Il1rn	10090.ENSMUSP00000015484	10090.ENSMUSP00000110126	0	0	0	0	0.256	0	0	0.229	0.401
Il1a	Syk	10090.ENSMUSP00000028882	10090.ENSMUSP00000113852	0	0	0	0	0.108	0	0	0.356	0.401
Ccl2	Ikbke	10090.ENSMUSP00000000193	10090.ENSMUSP00000054126	0	0	0	0	0.098	0	0	0.362	0.4
Gbp2	Trim30a	10090.ENSMUSP00000132435	10090.ENSMUSP00000076189	0	0	0	0	0.337	0	0	0.133	0.4
Il1b	Tnfsf9	10090.ENSMUSP00000028881	10090.ENSMUSP00000040412	0	0	0	0	0.113	0	0	0.352	0.4
Il1rn	Nfkbia	10090.ENSMUSP00000110126	10090.ENSMUSP00000021413	0	0	0	0	0.104	0	0	0.358	0.4
Psmb8	Trim30a	10090.ENSMUSP00000025196	10090.ENSMUSP00000076189	0	0	0	0	0.308	0.057	0	0.154	0.4

## Sheet: Table S4
gene	drug	regulatory approval	indication	interaction score
CCL2	CARLUMAB	Not Approved		19.66
CCL2	EMAPTICAP PEGOL	Not Approved	for treatment of kidney disease	19.66
ICAM1	ALICAFORSEN	Not Approved	for treatment of Chron's disease,for treatment of ulcerative colitis,antiinflammatory agent	19.66
ICAM1	BI-505	Not Approved	antineoplastic agent	14.745
CCL2	BINDARIT	Not Approved		9.83001
ICAM1	ENLIMOMAB	Not Approved		9.83001
ICAM1	LIFITEGRAST	Approved	antiinflammatory agent	9.83001
ICAM1	ENLIMOMAB PEGOL	Not Approved		9.83001
IL1B	CANAKINUMAB	Approved	DMARD,antiinflammatory agent	5.78236
CCL2	RS-504393	Not Approved		4.915
IL6	OLOKIZUMAB	Not Approved	DMARD,antiinflammatory agent	4.8147
IL6	CLAZAKIZUMAB	Not Approved	antineoplastic agent	4.8147
IL1B	GEVOKIZUMAB	Not Approved	antidiabetic	3.46941
ICAM1	HYALURONIC ACID	Approved	antileukopenic agent	3.27667
IL6	SILTUXIMAB	Approved		2.40735
IL6	IMIPENEM-CILASTATIN SODIUM	Not Approved		2.40735
IL6	BIAFINE CREAM	Not Approved		2.40735
IL1B	TT-301	Not Approved		2.31294
IL1B	POLYVALENT VACCINE	Not Approved		2.31294
IL1B	PENTAMIDINE	Approved		2.31294
CCL2	RECOMBINANT MONOCYTE CHEMOATTRACTANT PROTEIN-1	Not Approved		1.22875
IL6	PF-04236921	Not Approved	for treatment of Chron's disease,antiinflammatory agent	1.20367
IL6	ZILTIVEKIMAB	Not Approved		1.20367
IL6	SIRUKUMAB	Not Approved	DMARD,antiinflammatory agent	1.20367
IL6	MRA 003 US	Not Approved		1.20367
IL6	ZILTIVEKIMAB	Not Approved		1.20367
IL6	YSIL6	Not Approved		1.20367
IL6	ELSILIMOMAB	Not Approved		1.20367
IL6	MEDI-5117	Not Approved		1.20367
IL6	CLAZAKIZUMAB	Not Approved		1.20367
IL1B	RILONACEPT	Approved	DMARD,antiinflammatory agent	1.15647
IL1B	TILUDRONIC ACID	Approved	Bisphosphonates	1.15647
IL1B	LUTIKIZUMAB	Not Approved		1.15647
IL1B	GLUCOSAMINE	Approved		1.15647
IL1B	CDP-484	Not Approved		1.15647
SOCS3	ANTISENSE OLIGONUCLEOTIDES	Not Approved		0.893637
IL1B	NIMUSTINE	Not Approved		0.867354
SOCS3	PEGINTERFERON ALFA-2A	Approved	for treatment of hepatitis B and C	0.867354
IL6	VITAMIN A PALMITATE	Approved		0.80245
IL1B	AUTOANTIGEN	Not Approved		0.770981
IL1B	THYROGLOBULIN	Approved		0.770981
IL6	METRONIDAZOLE	Approved		0.601837
IL6	ECHINACEA PREPARATION	Approved		0.601837
IL6	CHINESE HERBS	Not Approved		0.601837
IL6	SIGNAL TRANSDUCTION INHIBITOR	Not Approved		0.601837
IL6	HMG-COA REDUCTASE INHIBITOR	Not Approved		0.601837
IL1B	ECHINACEA PREPARATION	Approved		0.578236
IL1B	MAFOSFAMIDE	Not Approved		0.578236
IL1B	CHINESE HERBS	Not Approved		0.578236
IL1B	RISEDRONIC ACID	Approved	Bisphosphonates,antiosteoporotic agent	0.578236
IL6	DIHYDROSPHINGOSINE	Not Approved		0.48147
IL6	BINETRAKIN	Not Approved		0.48147
SOCS3	PEGINTERFERON ALFA-2B	Approved		0.460782
IL6	NELFINAVIR	Approved		0.401225
IL6	SELECTIVE ESTROGEN RECEPTOR MODULATOR	Not Approved		0.401225
IL6	LEVOFLOXACIN ANHYDROUS	Approved		0.401225
SOCS3	RIBAVIRIN	Approved		0.398514
CCL2	RISPERIDONE	Approved	Antipsychotic Agents,antipsychotic agent	0.385491
IL6	LINEZOLID	Approved		0.343907
IL6	VITAMIN K	Approved	Antifibrinolytic Agents	0.343907
IL6	GALLIUM NITRATE	Approved		0.343907
IL1B	MITOGEN-ACTIVATED PROTEIN KINASE INHIBITOR	Not Approved		0.33042
IL1B	CELASTROL	Not Approved		0.289118
IL6	SAQUINAVIR	Approved		0.267483
IL1B	DRUGSATFDA.NDA:008378	Not Approved		0.256994
IL1B	DIACETYLRHEIN	Approved	antidiabetic	0.256994
IL6	GEMFIBROZIL	Approved	Antilipemic Agents	0.240735
IL1B	CLODRONIC ACID	Approved	antineoplastic agent	0.231294
IL6	IFOSFAMIDE	Approved	Antineoplastic Agents	0.21885
IL1B	ACITRETIN	Approved	Keratolytic Agents	0.216838
IL1B	ANTICONVULSANT AGENT	Not Approved		0.210268
IL1B	OFLOXACIN	Approved		0.210268
IL6	ENZYME INHIBITOR	Not Approved		0.200612
IL6	INTERFERON ALFA-2B	Approved	Antineoplastic Agents; Immunomodulatory Agents,for treatment of hepatitis C,for treatment of hepatitis B and C,for treatment of hepatitis	0.171954
IL1B	GALLIUM NITRATE	Approved		0.16521
IL1B	FLUTICASONE	Approved	glucocorticoid,antiinflammatory agent,for treatment of symptomatic exophthalmos associated with thyroid-related eye disease,bronchodilator	0.16521
IL1B	ETIDRONIC ACID	Approved		0.16521
IL1B	CEFACLOR ANHYDROUS	Approved		0.16521
IL1B	NICARDIPINE	Approved	Anti-Arrhythmia Agents; Antihypertensive Agents	0.154196
IL6	SELENIUM	Approved		0.141609
IL1B	HYDROQUINONE	Approved		0.136055
IL1B	BECLOMETHASONE	Approved	glucocorticoid,antiinflammatory agent	0.128497
IL6	DULOXETINE HYDROCHLORIDE	Approved	antidepressant	0.114636
IL1B	USTEKINUMAB	Approved	Antipsoriatic Agents,DMARD,antiinflammatory agent	0.11014
IL1B	ERYTHROMYCIN	Approved		0.105134
IL6	FENOFIBRATE	Approved	anticholesterolaemic agent,antidyslipidaemic agent	0.100306
IL6	IBUDILAST	Not Approved	neuroprotectant	0.100306
IL6	ETANERCEPT-SZZS	Approved	DMARD,antiinflammatory agent	0.100306
IL1B	IBUDILAST	Not Approved	neuroprotectant	0.0963726
IL6	FENTANYL CITRATE	Approved	adjuvant to anesthesia,opioid,analgesic	0.096294
IL6	INFLIXIMAB-DYYB	Approved	DMARD,antiinflammatory agent	0.0925904
IL6	ARSENIC TRIOXIDE	Approved	antineoplastic agent	0.0925904
IL1B	INFLIXIMAB-DYYB	Approved	DMARD,antiinflammatory agent	0.0889594
IL1B	MELATONIN	Approved	Hypnotics and Sedatives	0.0889594
IL1B	LANSOPRAZOLE	Approved	antiulcer agent,Proton pump inhibitor	0.0826051
IL6	RITUXIMAB	Approved	antineoplastic agent	0.080245
IL6	ADALIMUMAB-ADBM	Approved	DMARD,antiinflammatory agent	0.080245
IL6	MIDOSTAURIN	Approved	antineoplastic agent	0.0752297
IL1B	PRAVASTATIN SODIUM	Approved	anticholesterolaemic agent,antihypecholesterolemic agent	0.0746111
IL6	PEGINTERFERON ALFA-2A	Approved	for treatment of hepatitis B and C	0.0708044
IL1B	PENTOXIFYLLINE	Approved	for treatment of amyotrophic lateral sclerosis (ALS)	0.0680277
IL1B	METFORMIN	Approved	antidiabetic	0.0660841
IL1B	HYDROCORTISONE BUTYRATE	Approved		0.062512
IL1B	PAREGORIC	Approved	analgesic	0.062512
IL1B	VERAPAMIL	Approved	antihypertensive agent	0.0608669
IL1B	LITHIUM	Approved		0.0564133
IL1B	ANTIDEPRESSANT AGENT	Not Approved		0.0502814
IL1B	RESVERATROL	Approved	antineoplastic agent,antidiabetic,for treatment of herpes simplex virus 1	0.0502814
IL1B	RALOXIFENE HYDROCHLORIDE	Approved	Hormone Replacement Agents	0.0492116
IL6	INSULIN, REGULAR, HUMAN	Approved	for treatment of diabetic foot ulcers,antidiabetic	0.0462952
IL6	PEGINTERFERON ALFA-2B	Approved		0.0376148
IL1B	TETRADECANOYLPHORBOL ACETATE	Not Approved		0.0373055
IL1B	CYTARABINE	Approved	antineoplastic agent	0.0340139
IL1B	ASPIRIN	Approved	NSAID	0.033042
IL6	RIBAVIRIN	Approved		0.0325317
IL6	CISPLATIN	Approved		0.00807835
